# Supplementary material
Source: publisher figshare collection journal article supplement (https://asha.figshare.com/articles/dataset/_/14880039)

**Supplemental Material S2.** Plots of all scaled contours.

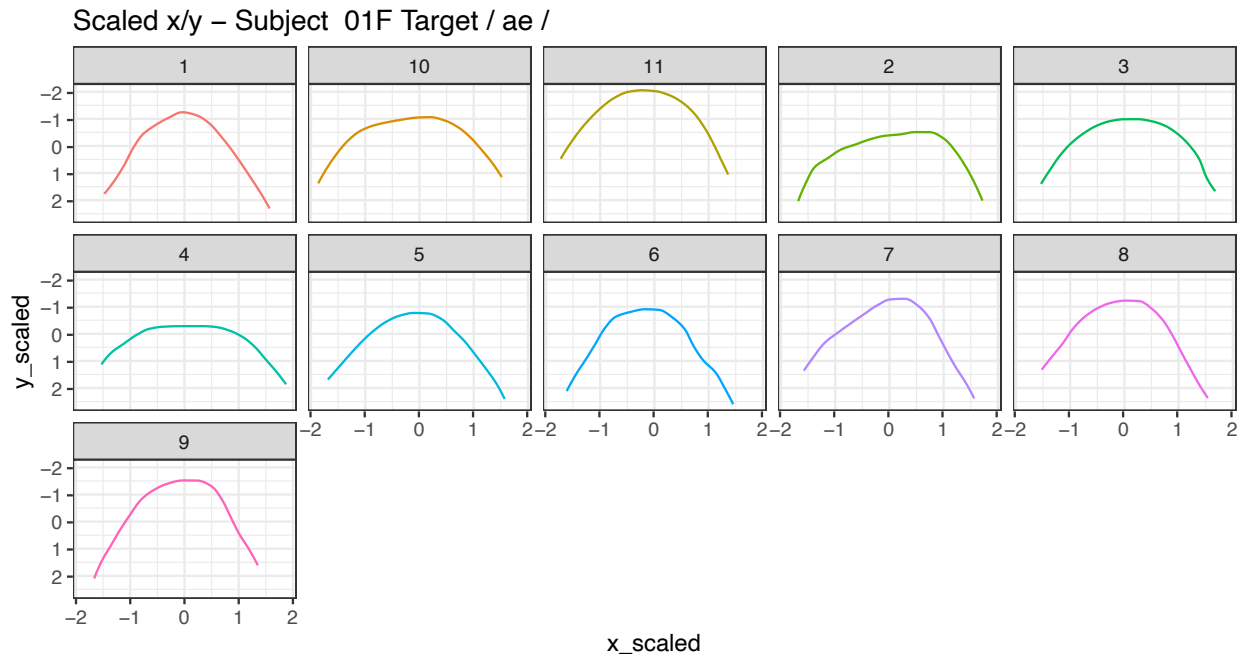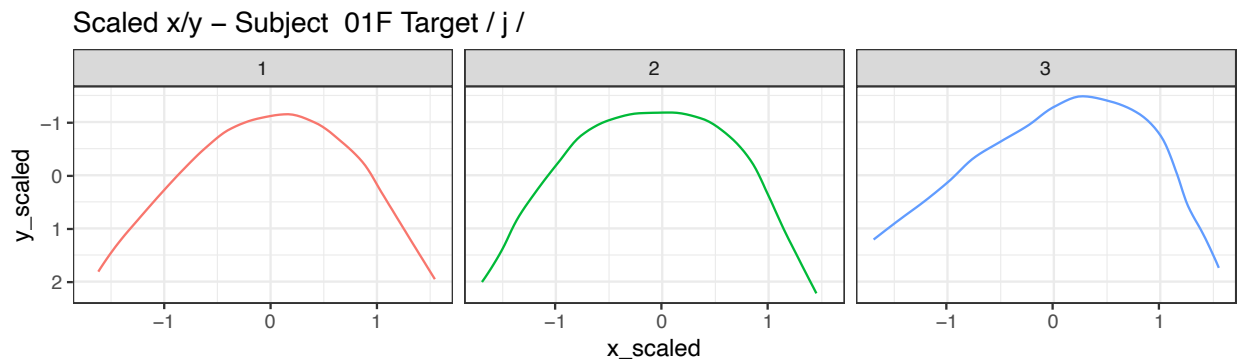

Scaled x/y – Subject 01F Target / k /

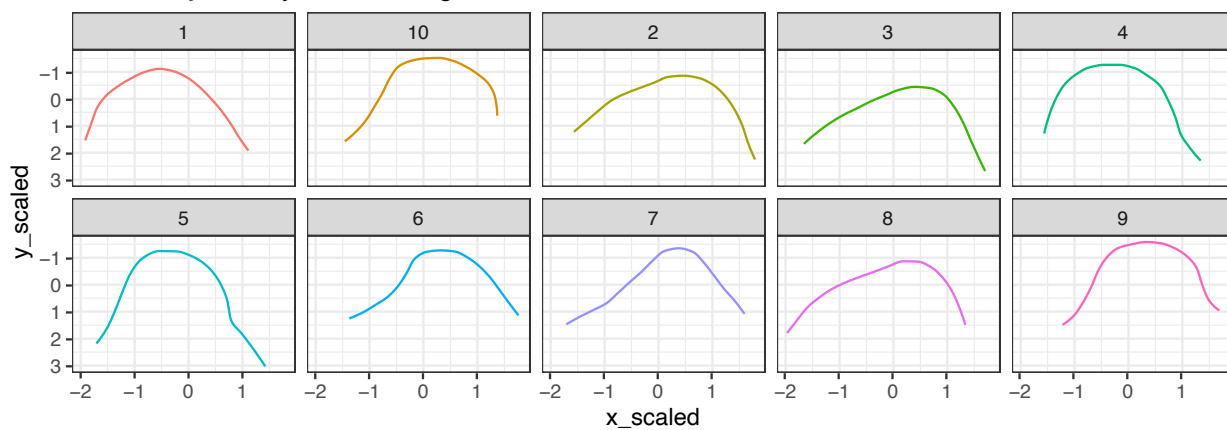

Scaled x/y – Subject 01F Target / l /

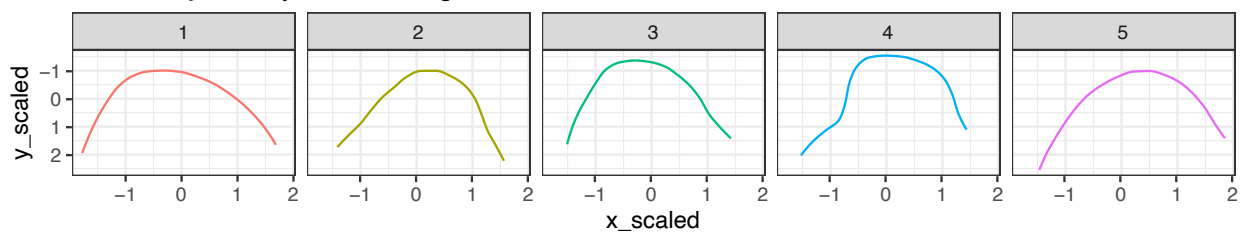

Scaled x/y – Subject 01F Target / r /

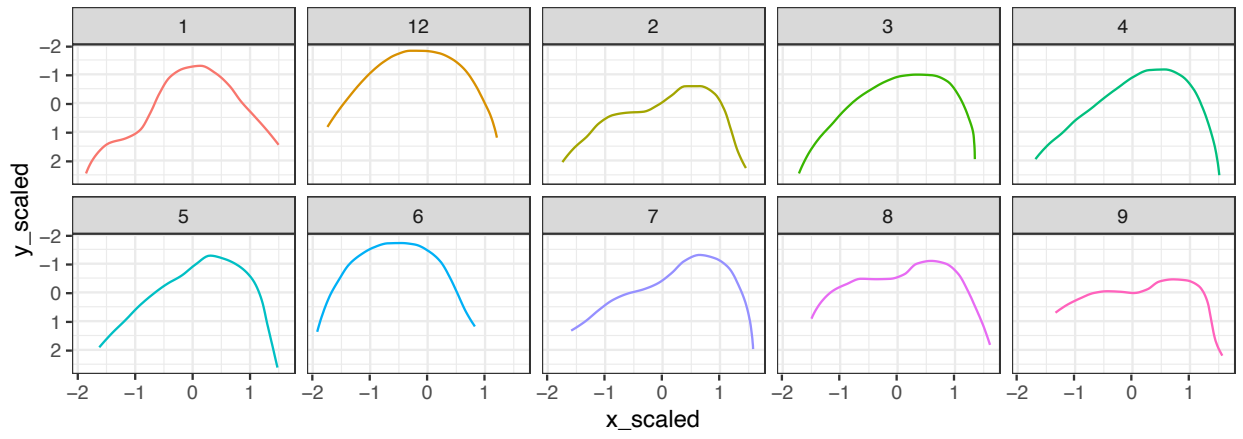

Scaled x/y – Subject 01F Target / t /

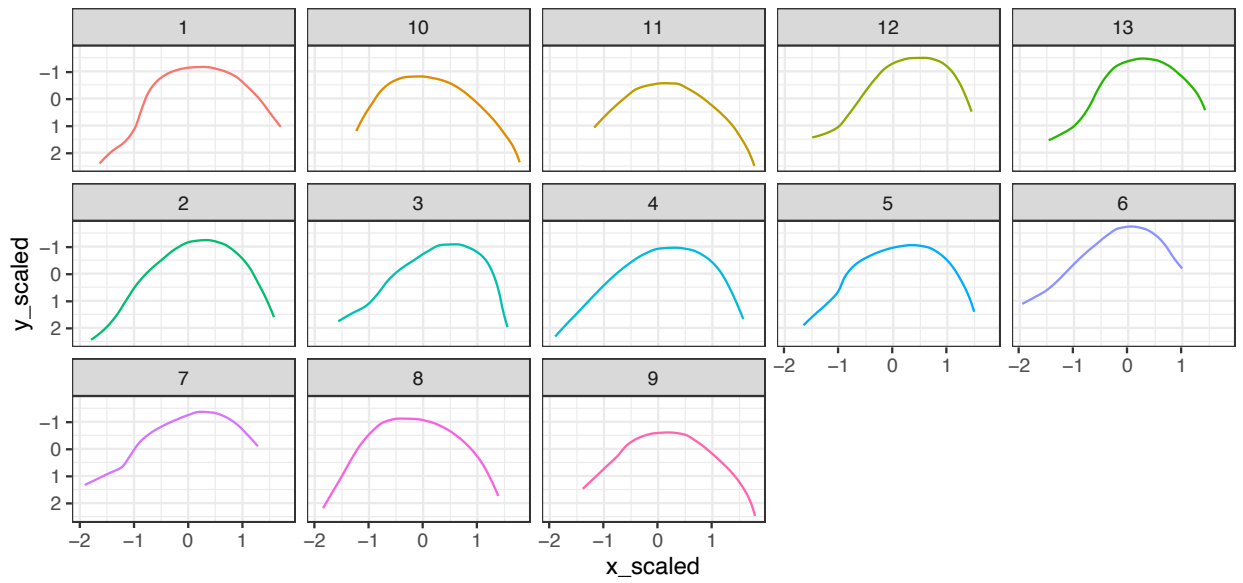

Scaled x/y – Subject 01F Target / w /

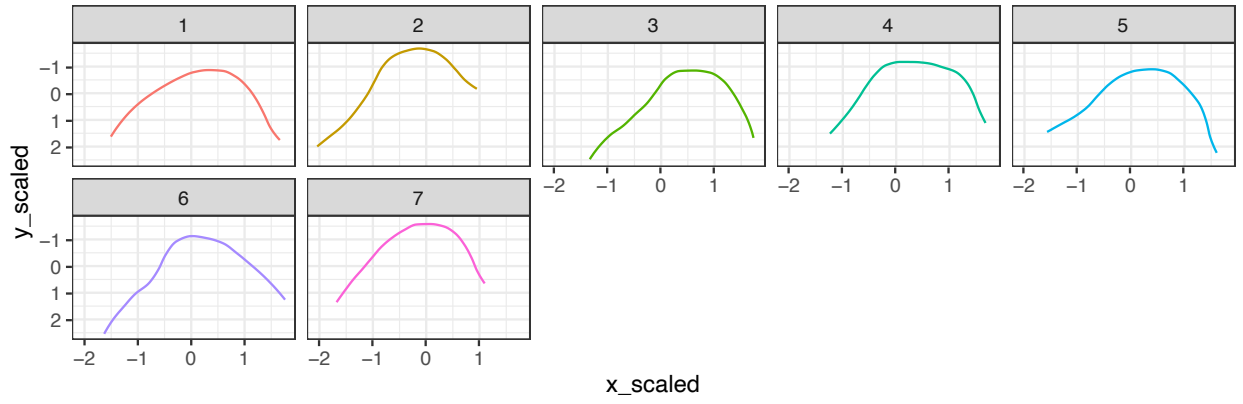

Scaled x/y – Subject 02F Target / ae /

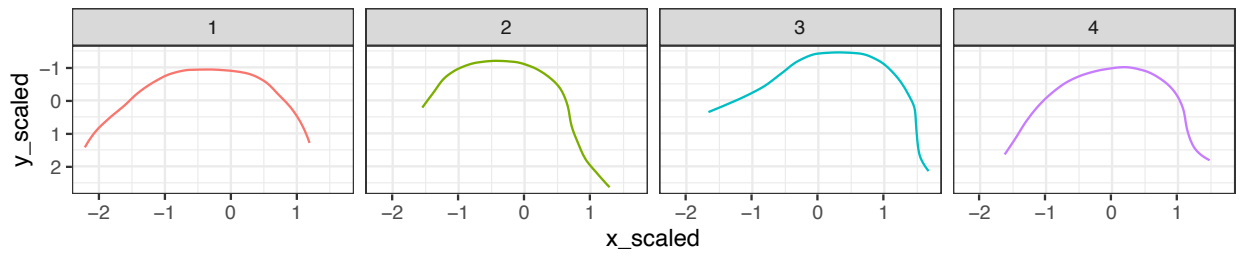

Scaled x/y – Subject 02F Target / j /

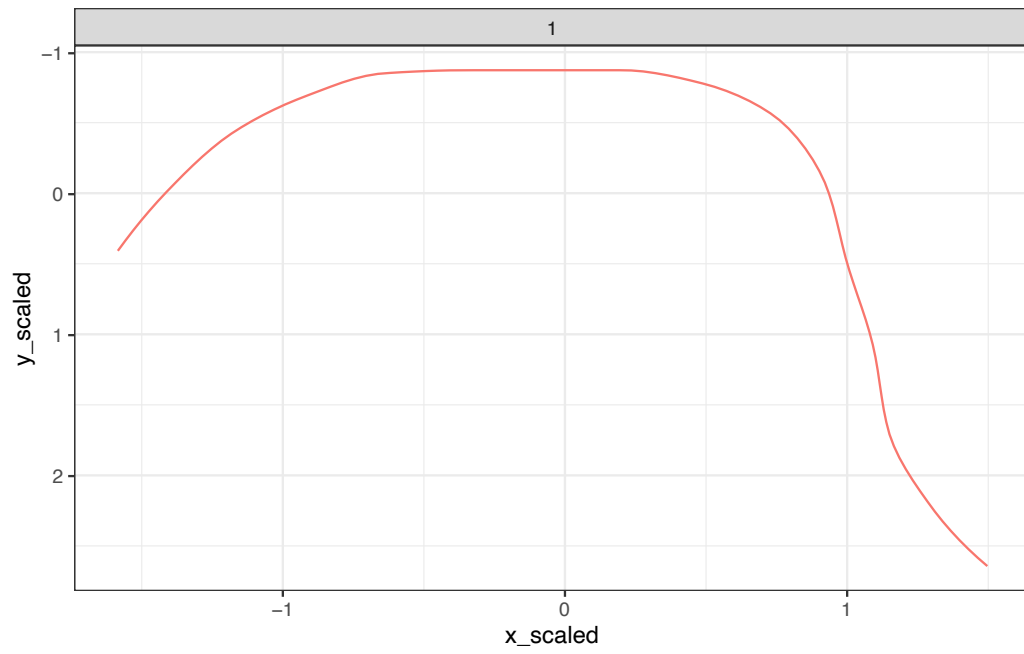

Scaled x/y – Subject 02F Target / k /

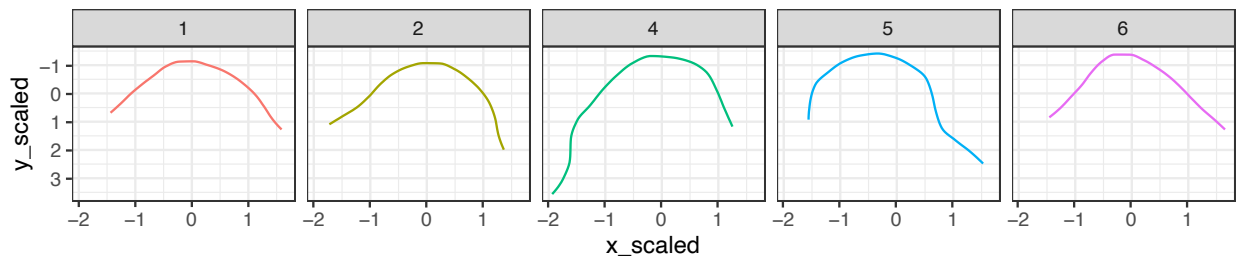

Scaled x/y – Subject 02F Target / l /

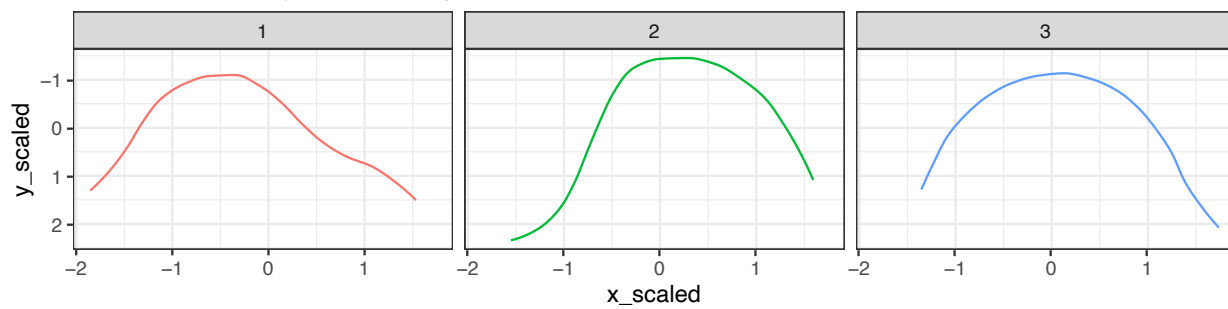

Scaled x/y – Subject 02F Target / r /

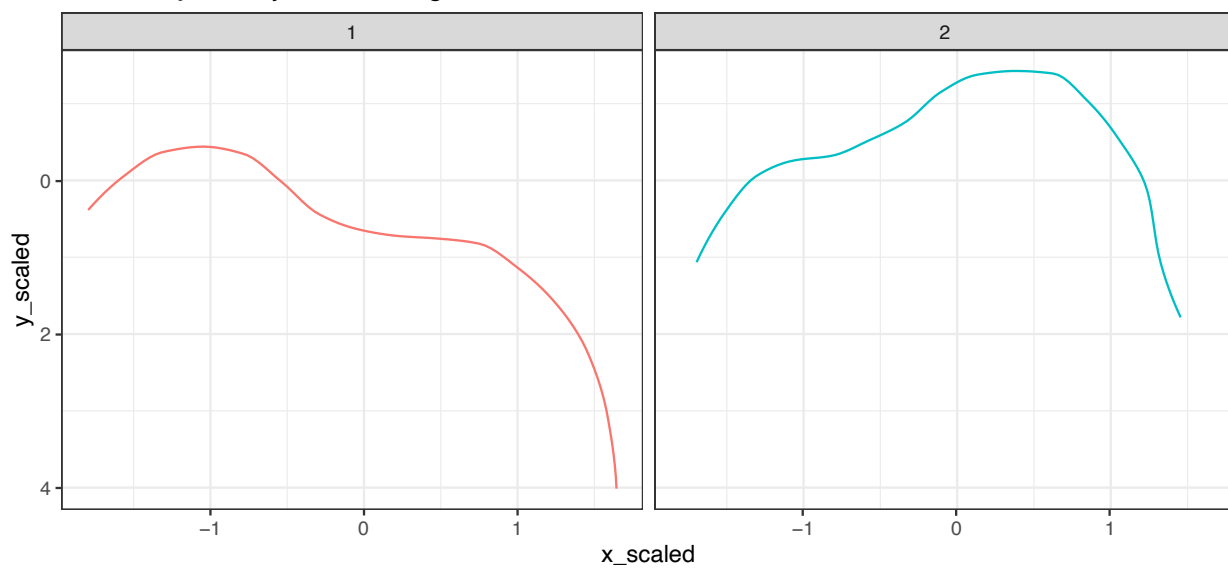

Scaled x/y – Subject 02F Target / t /

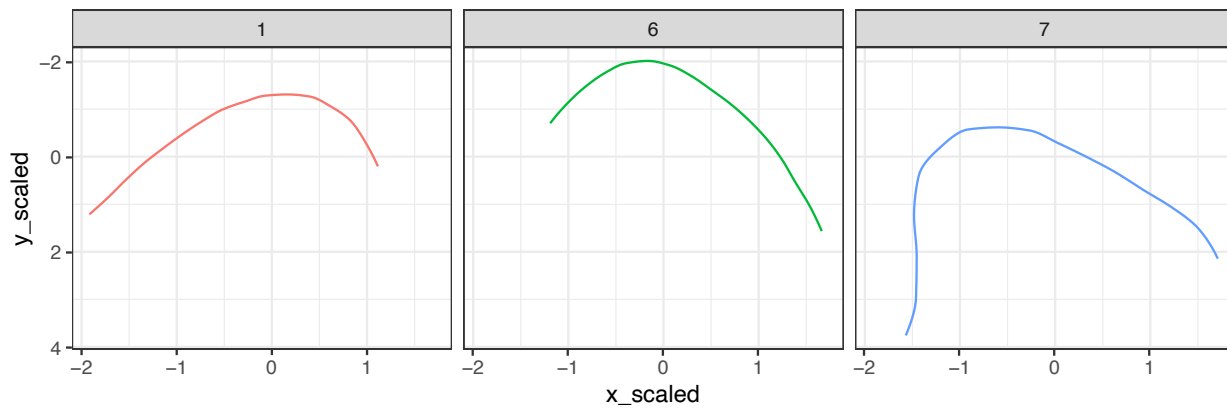

Scaled x/y – Subject 02F Target / w /

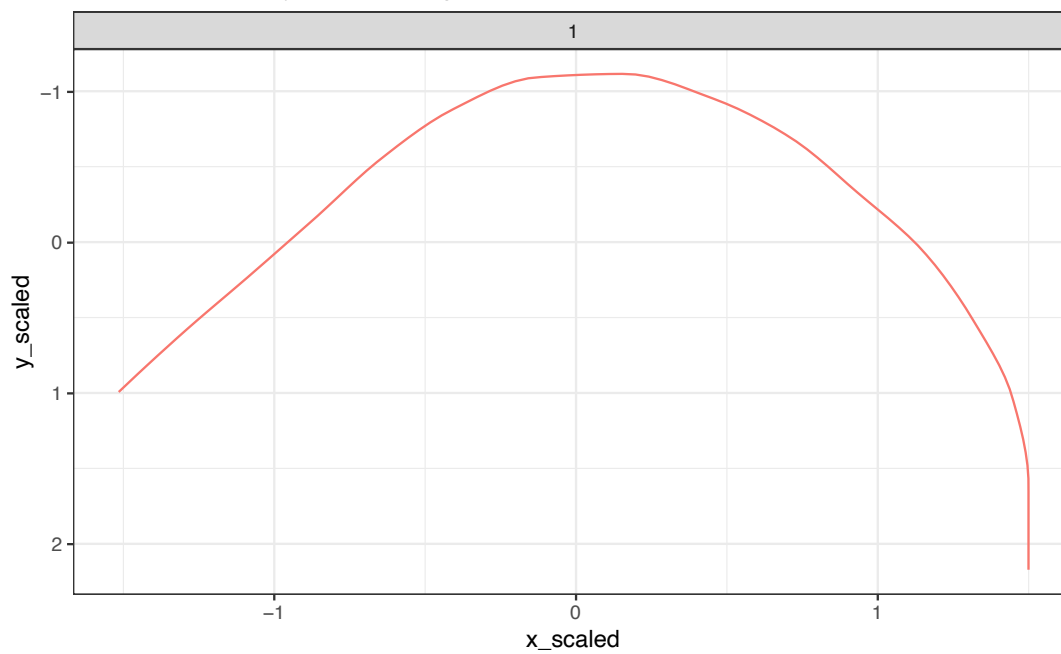

Scaled x/y – Subject 03M Target / ae /

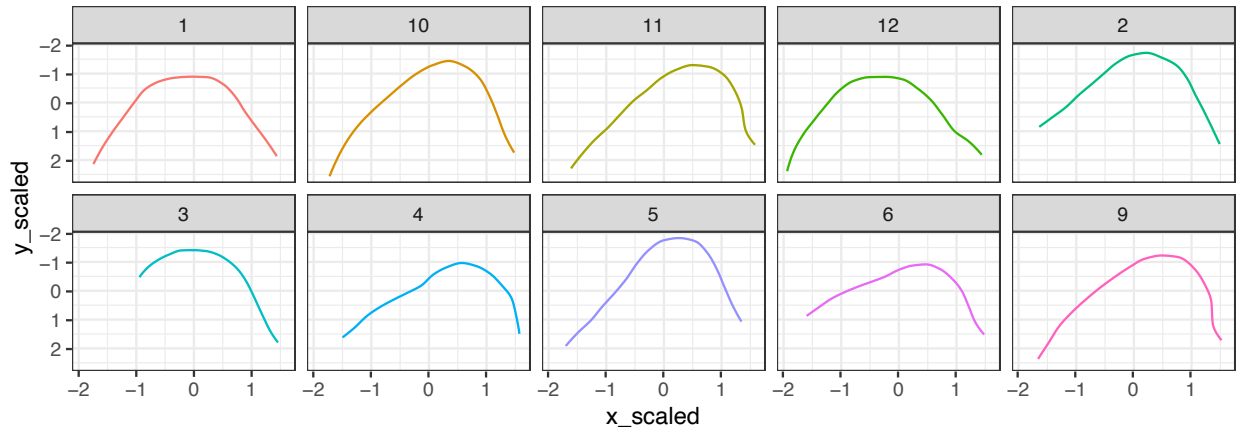

Scaled x/y – Subject 03M Target / j /

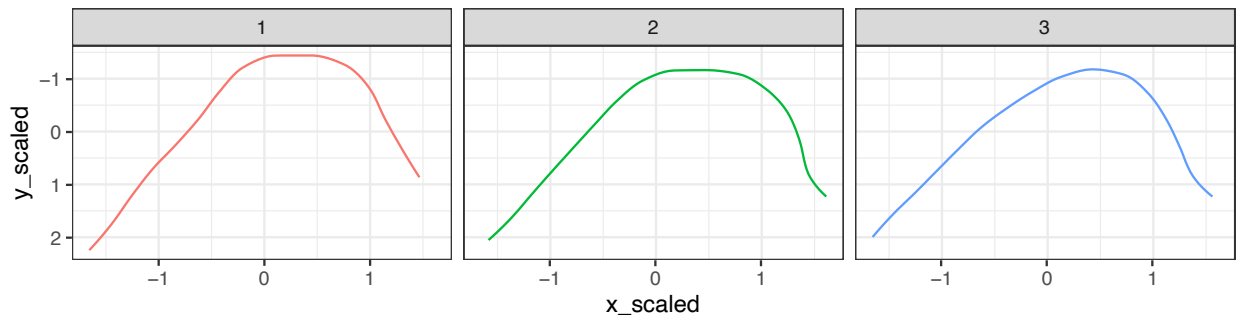



Scaled x/y – Subject 03M Target / k /

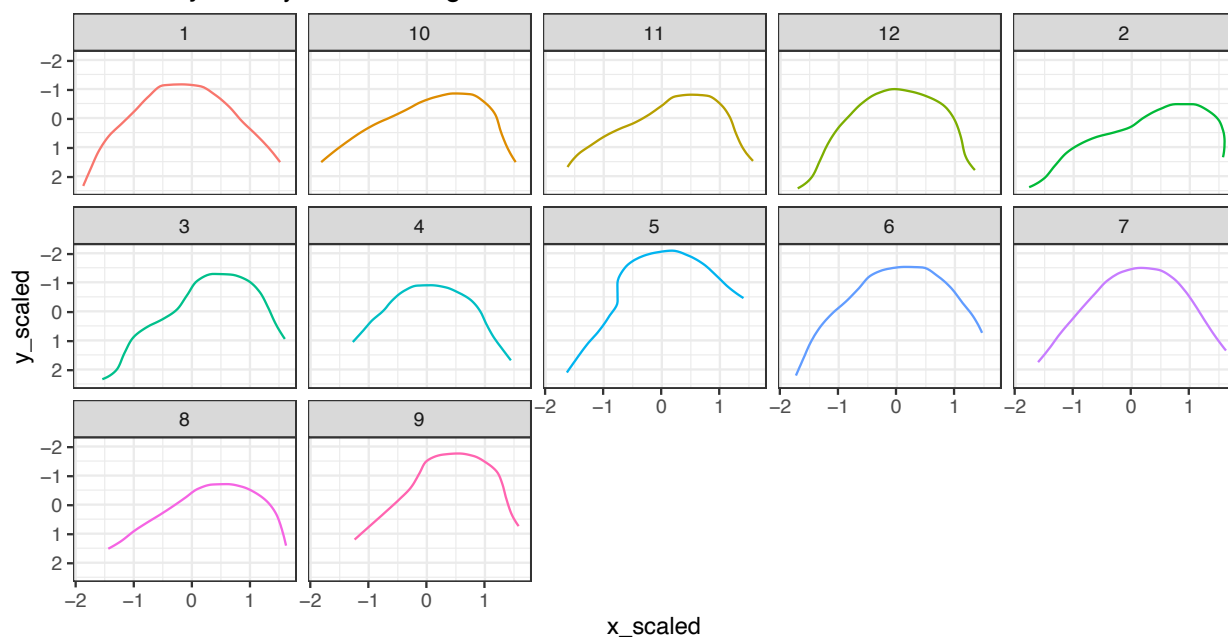

Scaled x/y – Subject 03M Target / l /

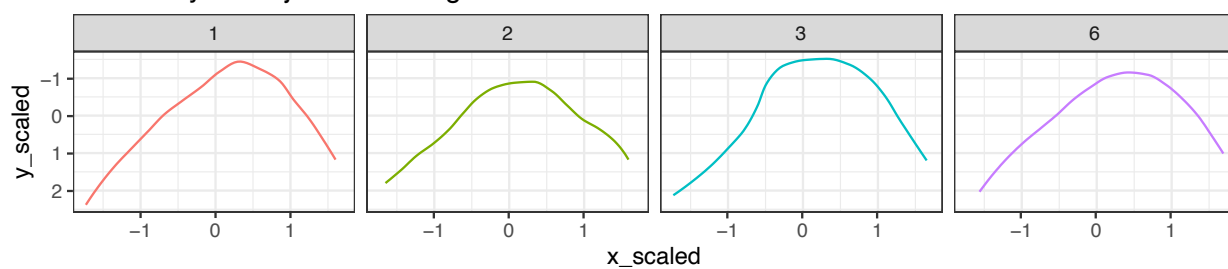

Scaled x/y – Subject 03M Target / r /

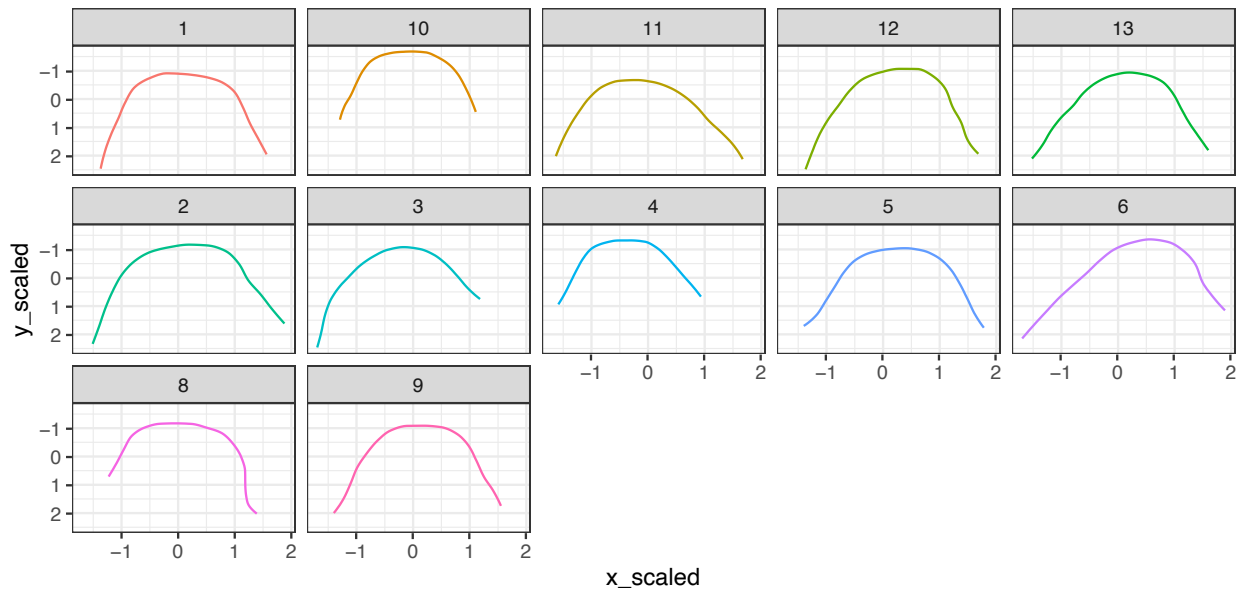

Scaled x/y – Subject 03M Target / t /

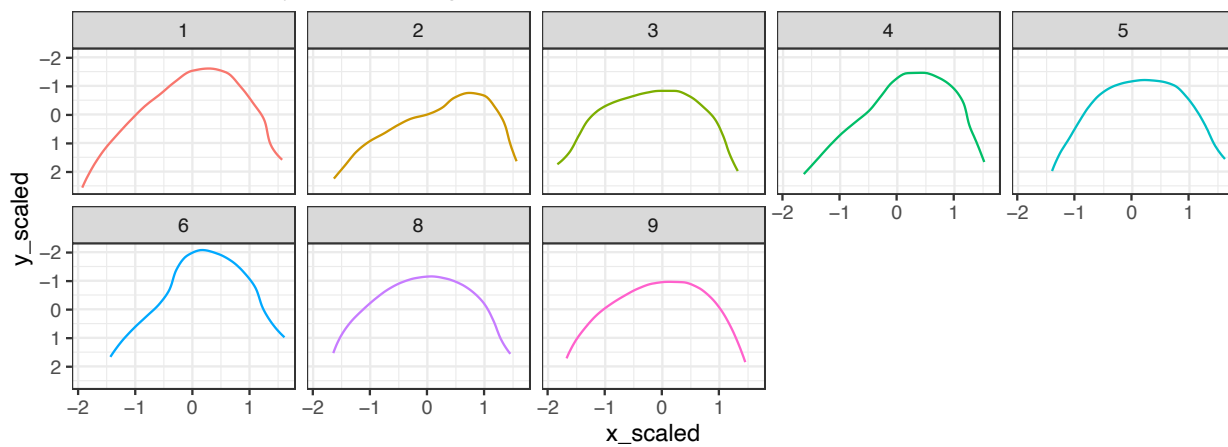

Scaled x/y – Subject 03M Target / w /

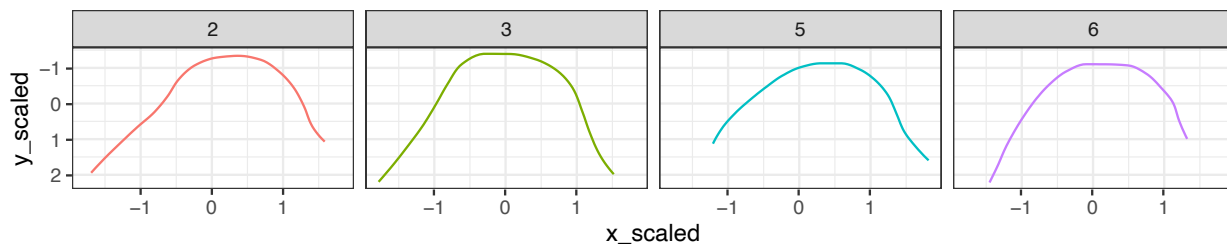

Scaled x/y – Subject 04F Target / ae /

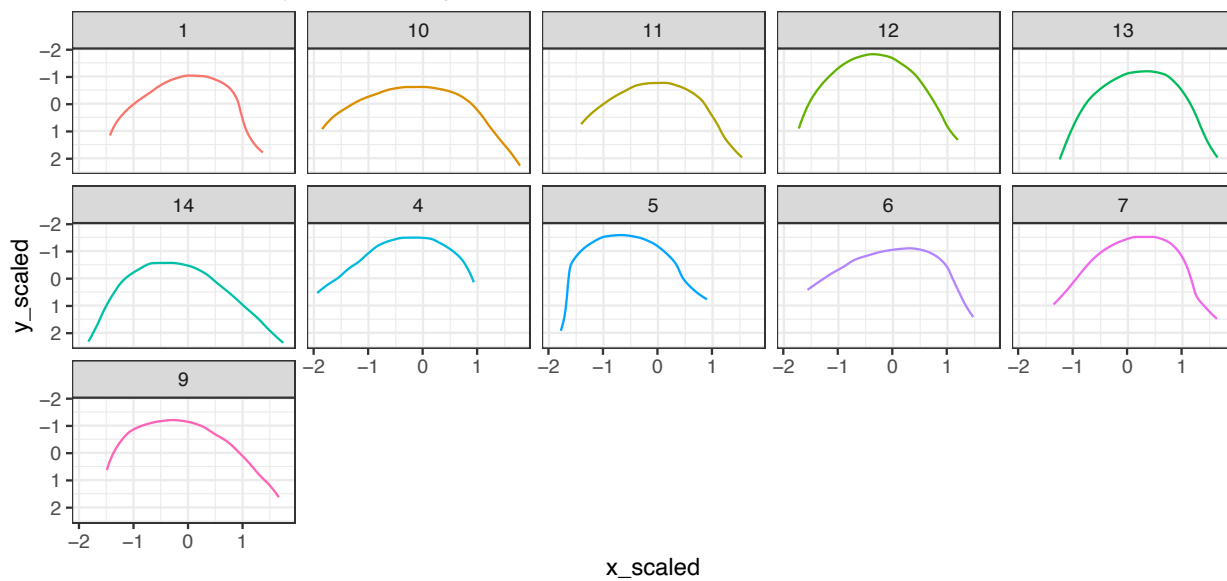

Scaled x/y – Subject 04F Target / j /

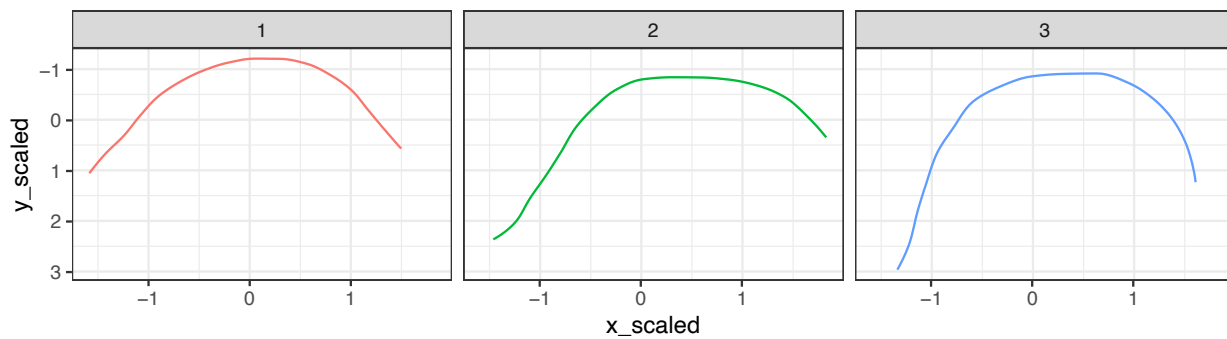

Scaled x/y – Subject 04F Target / k /

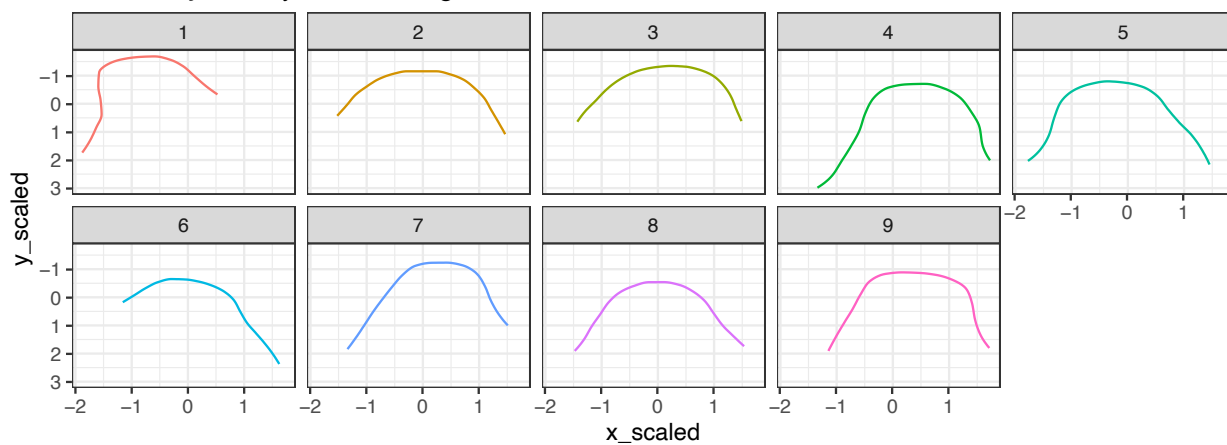

Scaled x/y – Subject 04F Target / l /

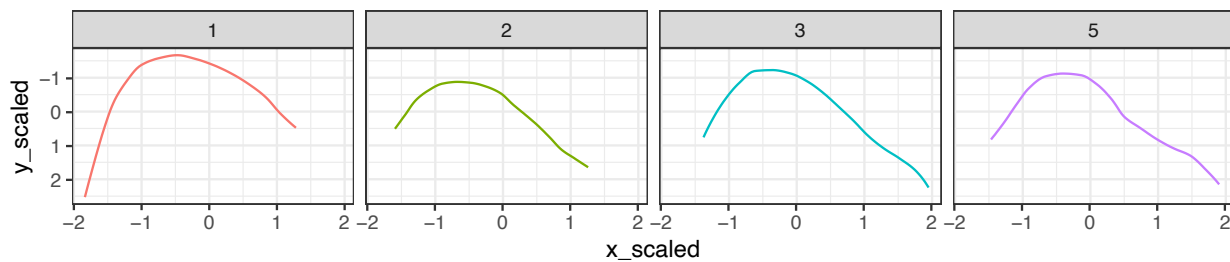

Scaled x/y – Subject 04F Target / r /

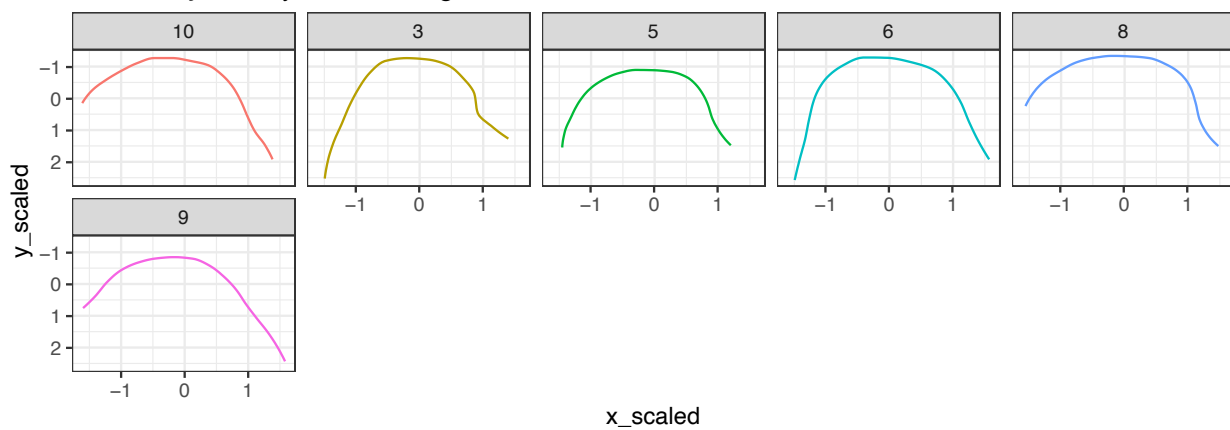

Scaled x/y – Subject 04F Target / t /

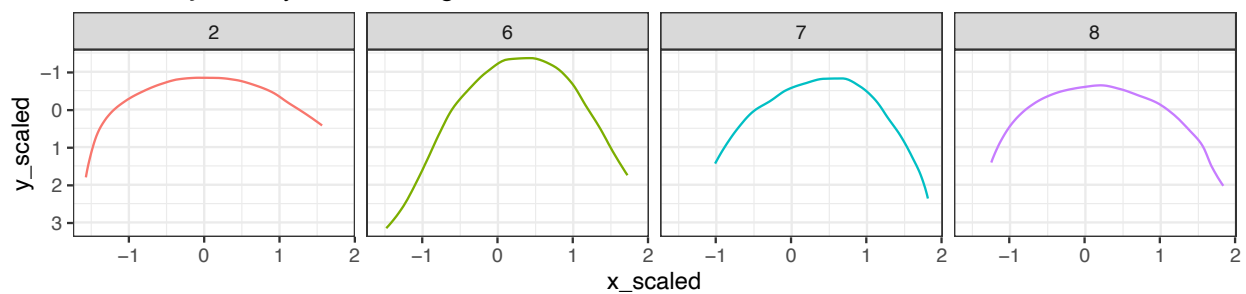

Scaled x/y – Subject 04F Target / w /

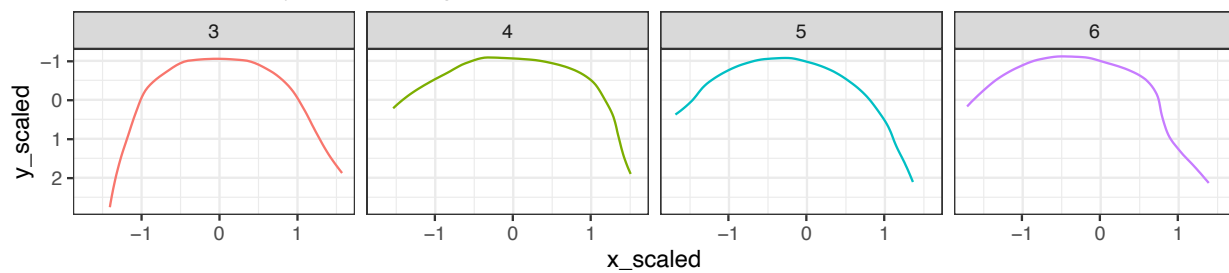

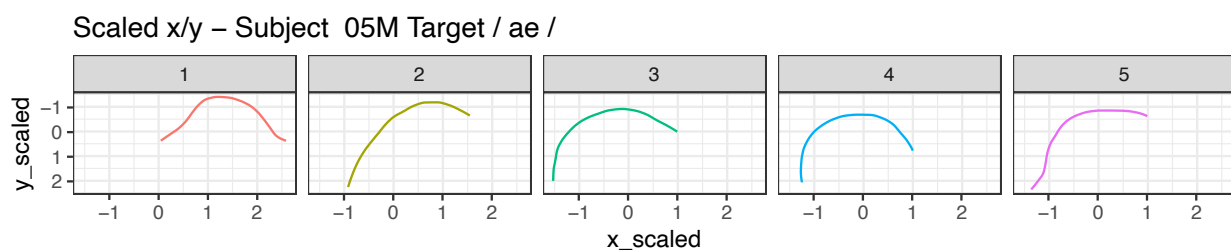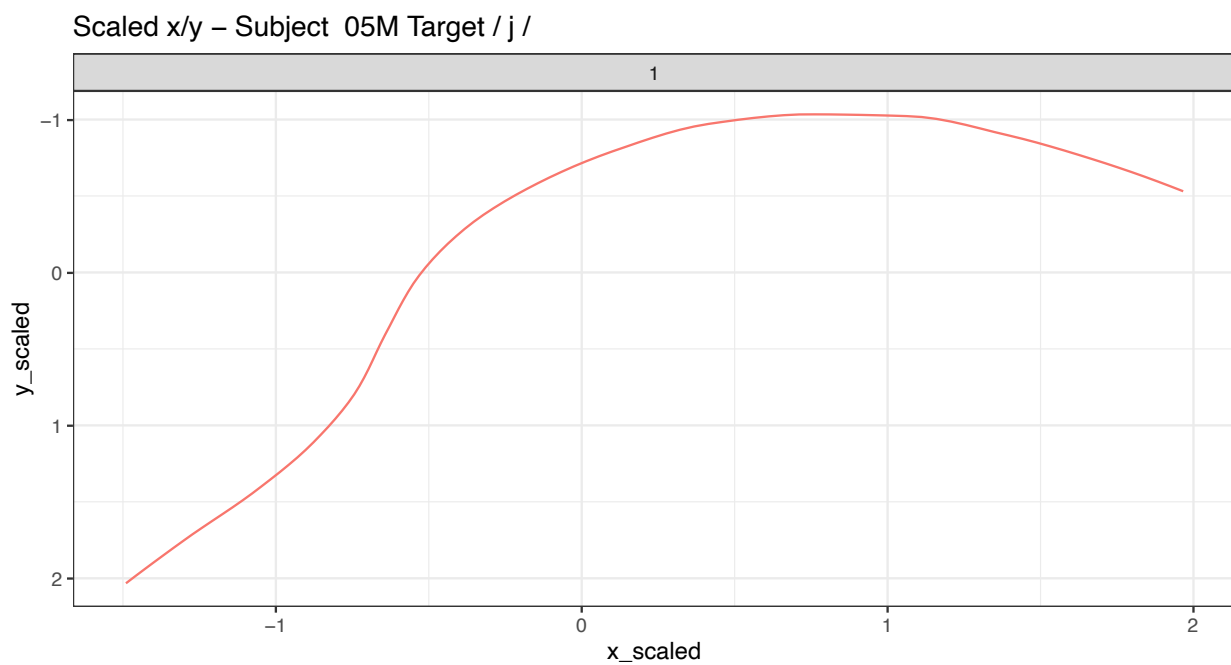

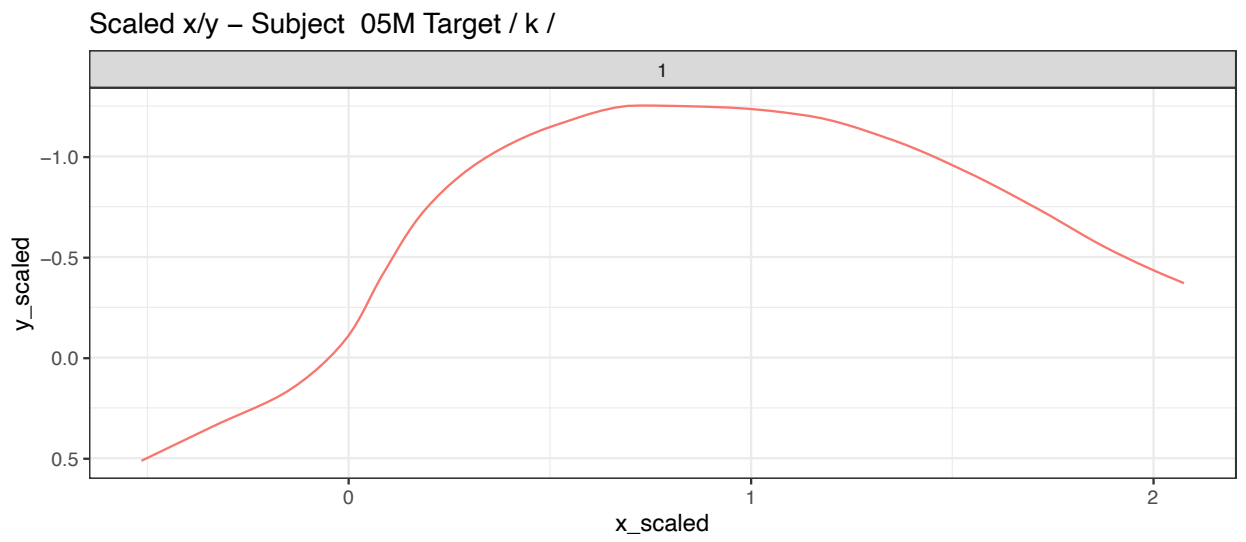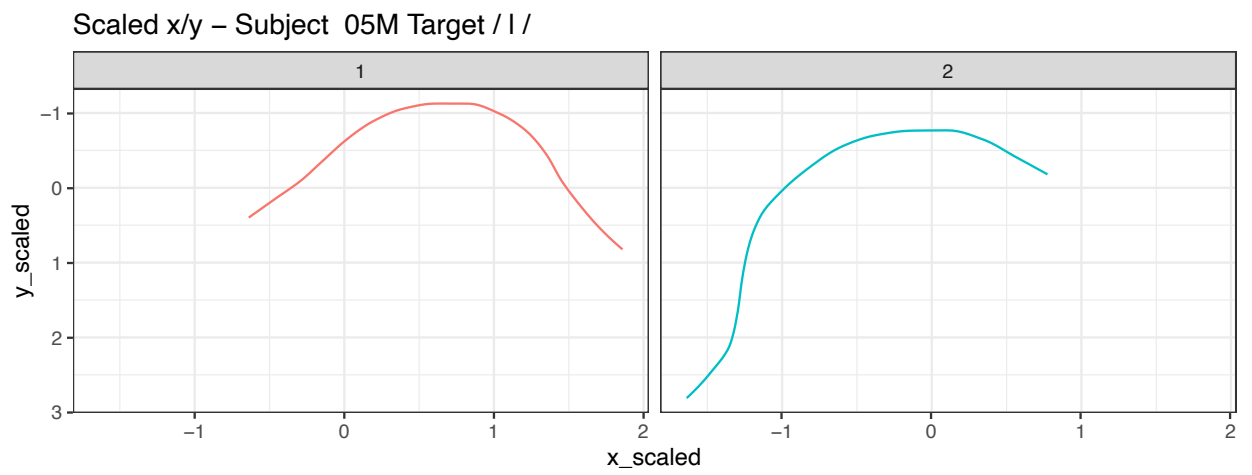



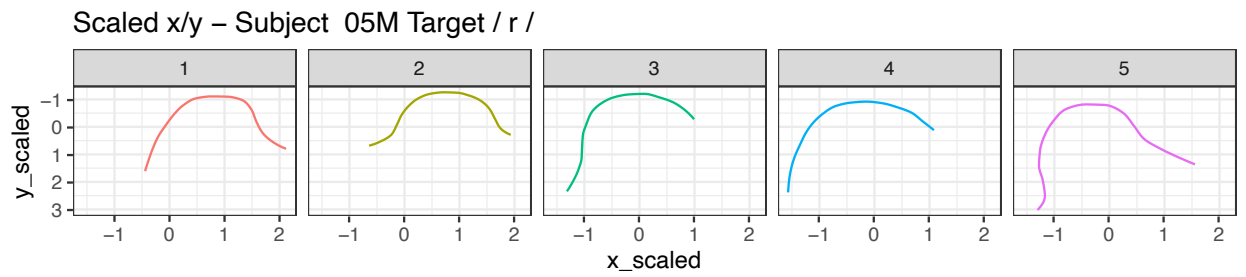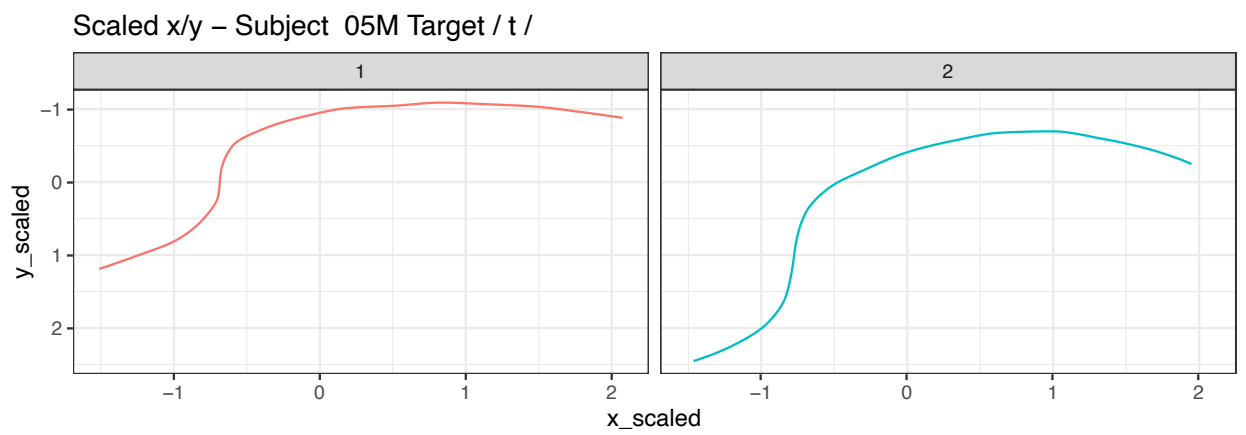

Scaled x/y – Subject 05M Target / w /

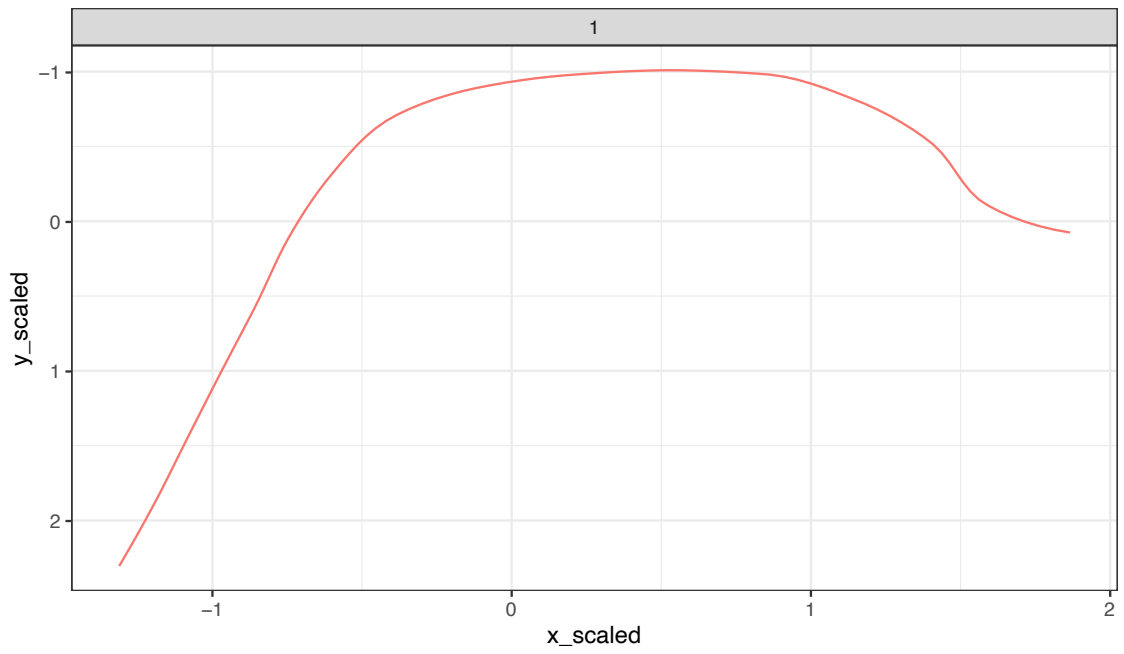

Scaled x/y – Subject 06M Target / ae /

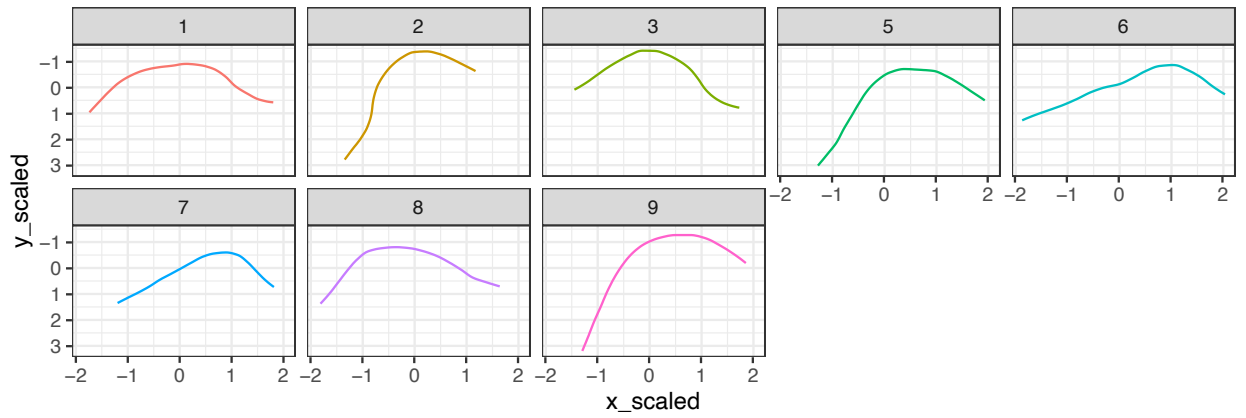

Scaled x/y – Subject 06M Target / j /

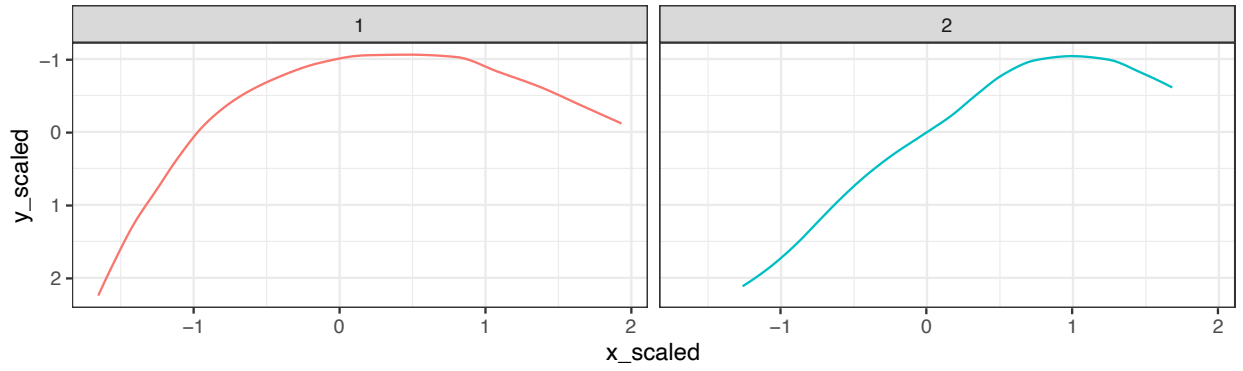

Scaled x/y – Subject 06M Target / k /

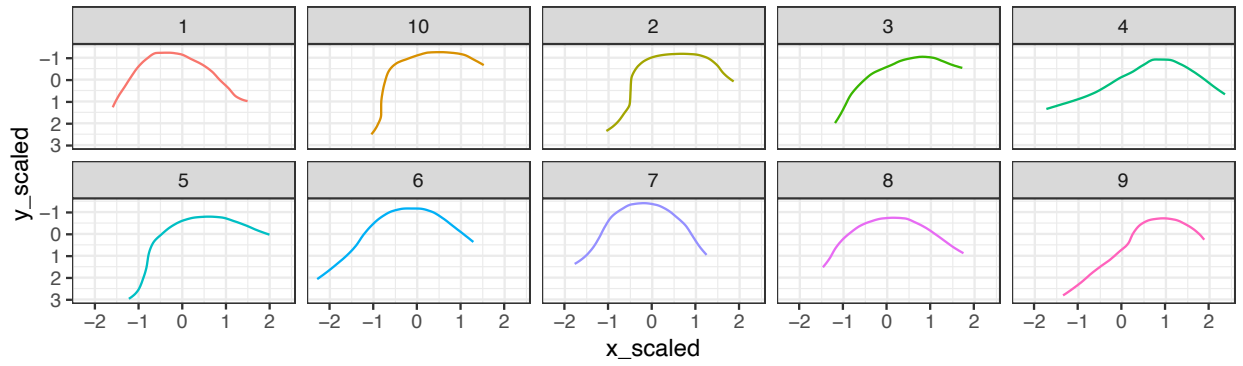

Scaled x/y – Subject 06M Target / l /

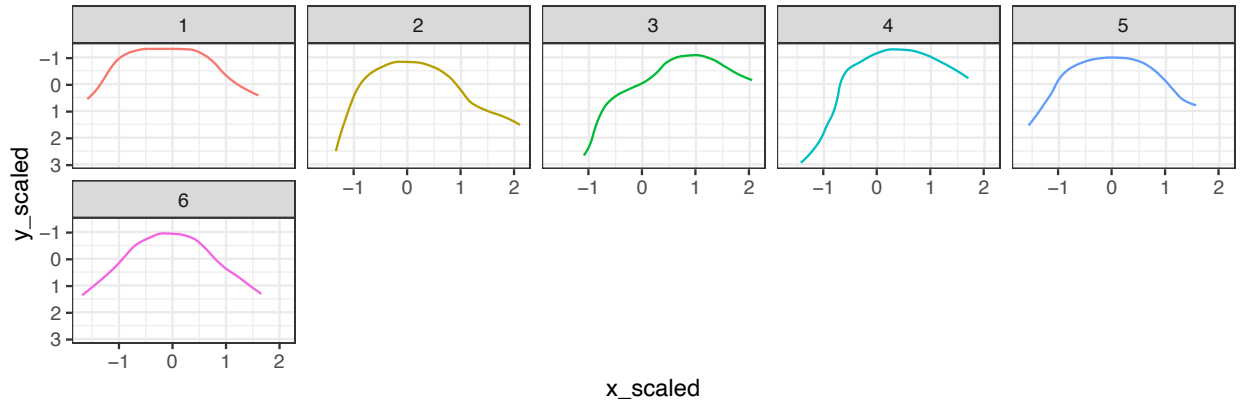

Scaled x/y – Subject 06M Target / r /

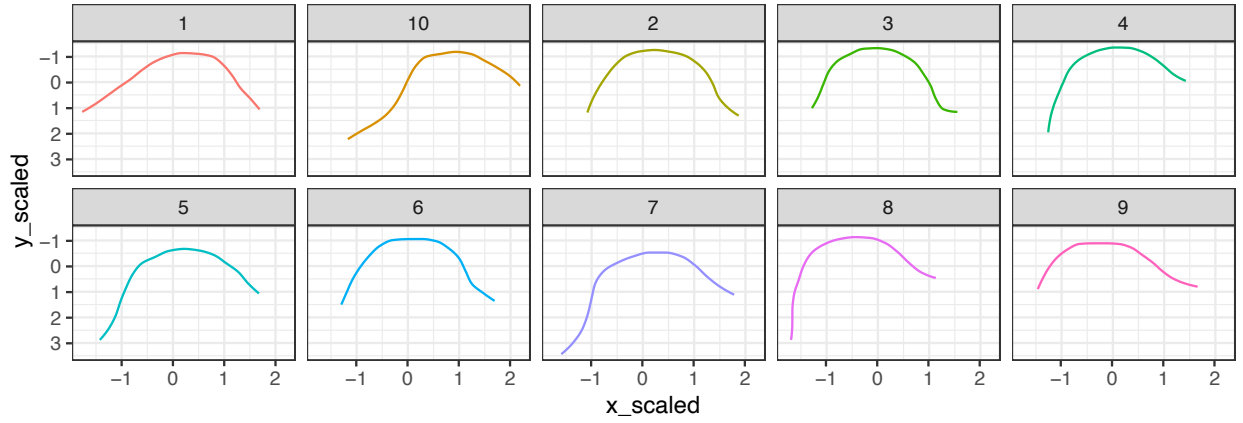

Scaled x/y – Subject 06M Target / t /

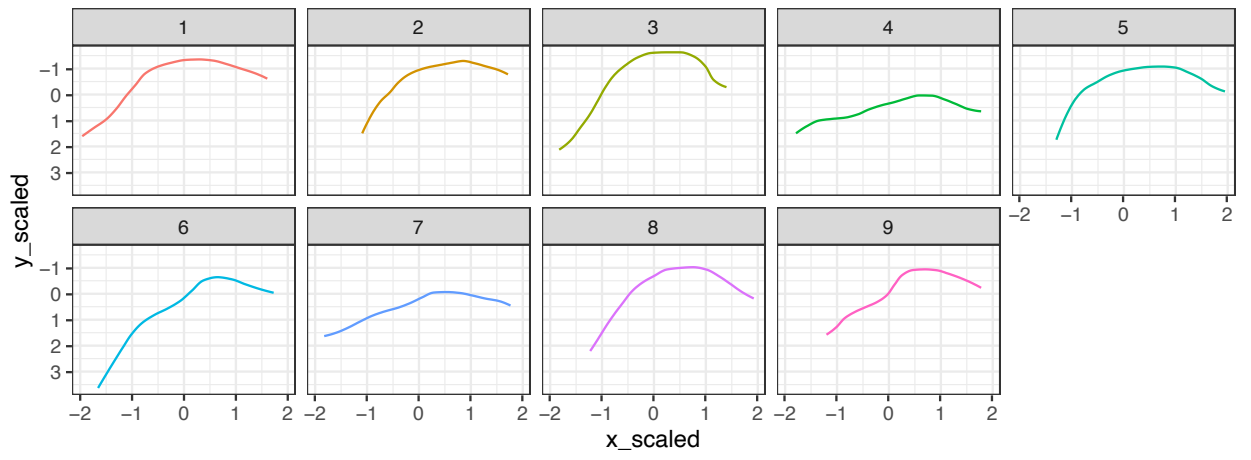

Scaled x/y – Subject 06M Target / w /

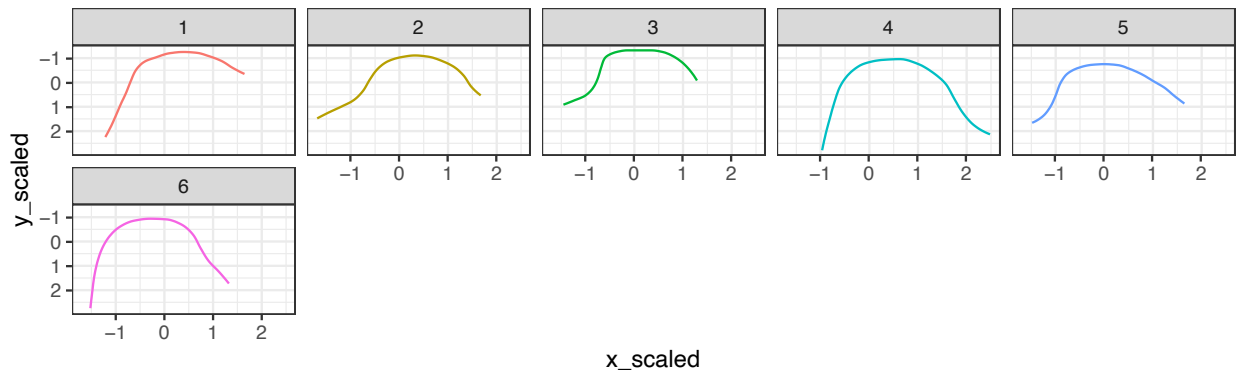

Scaled x/y – Subject 07F Target / ae /

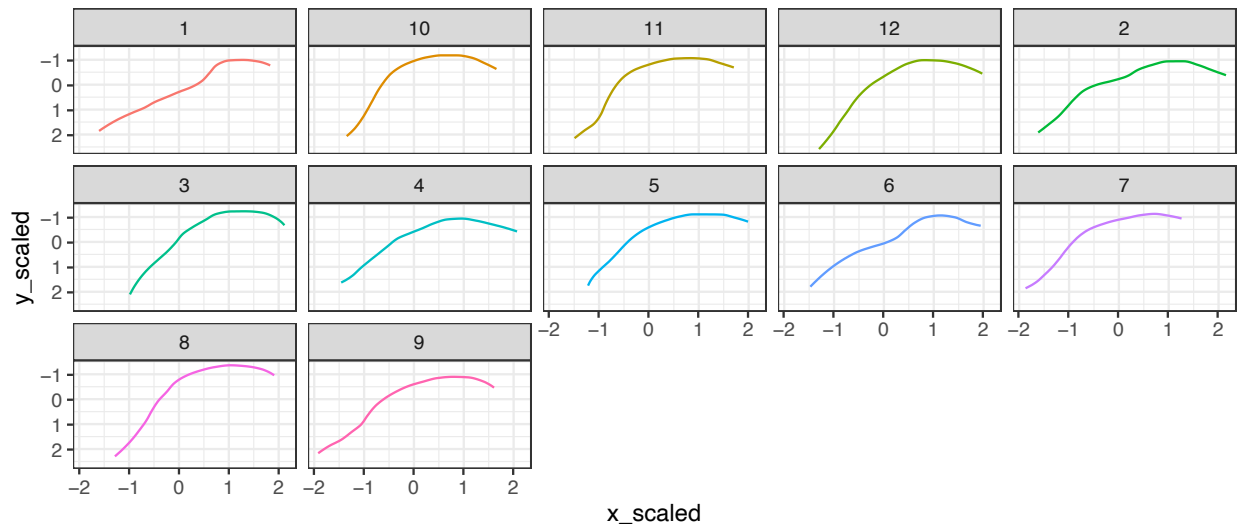

Scaled x/y – Subject 07F Target / j /

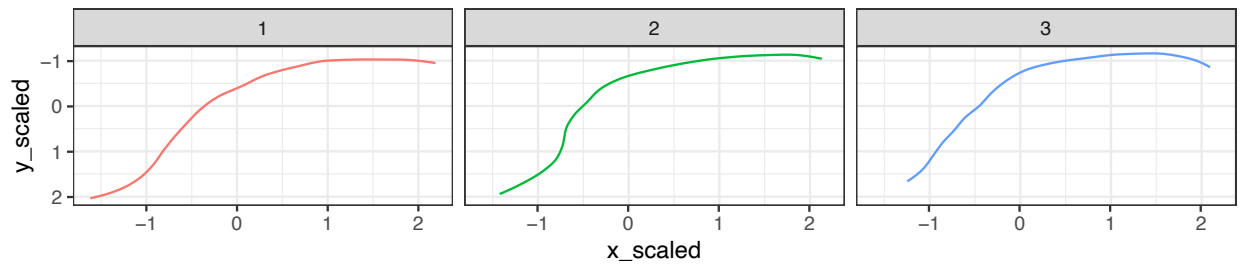

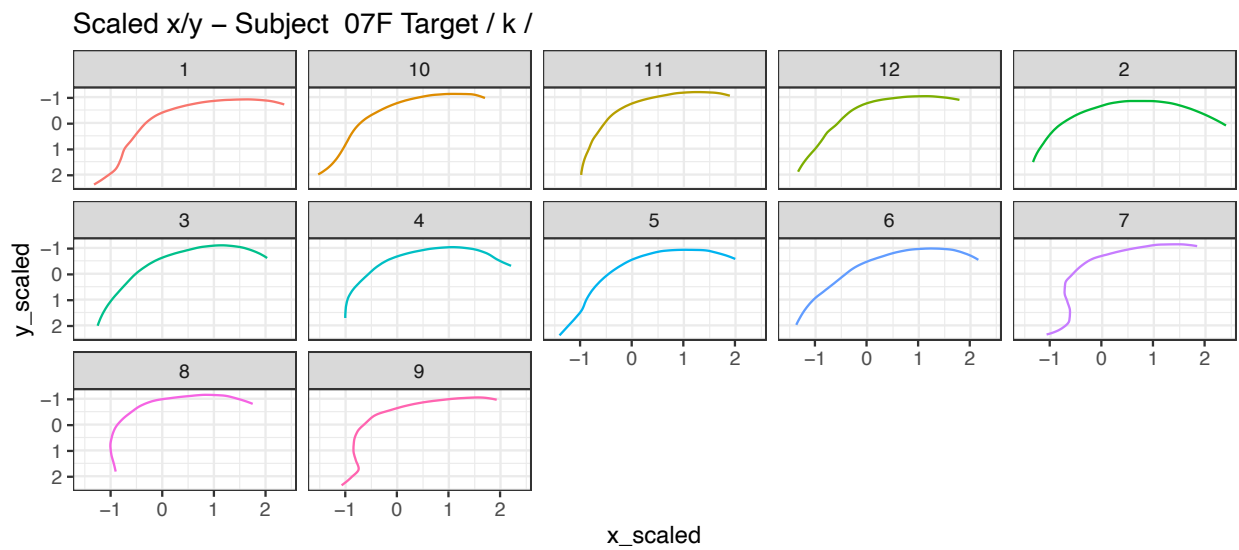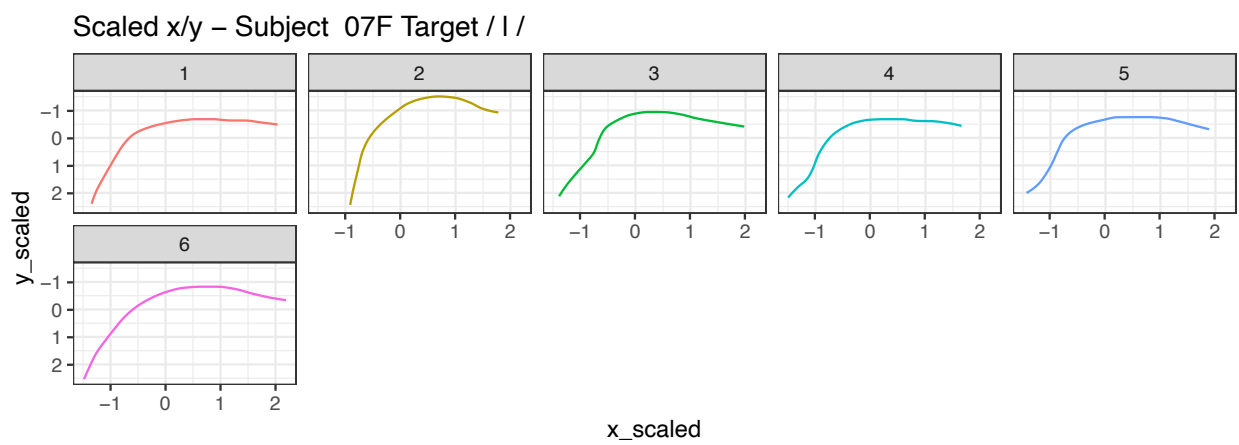

Scaled x/y – Subject 07F Target / r /

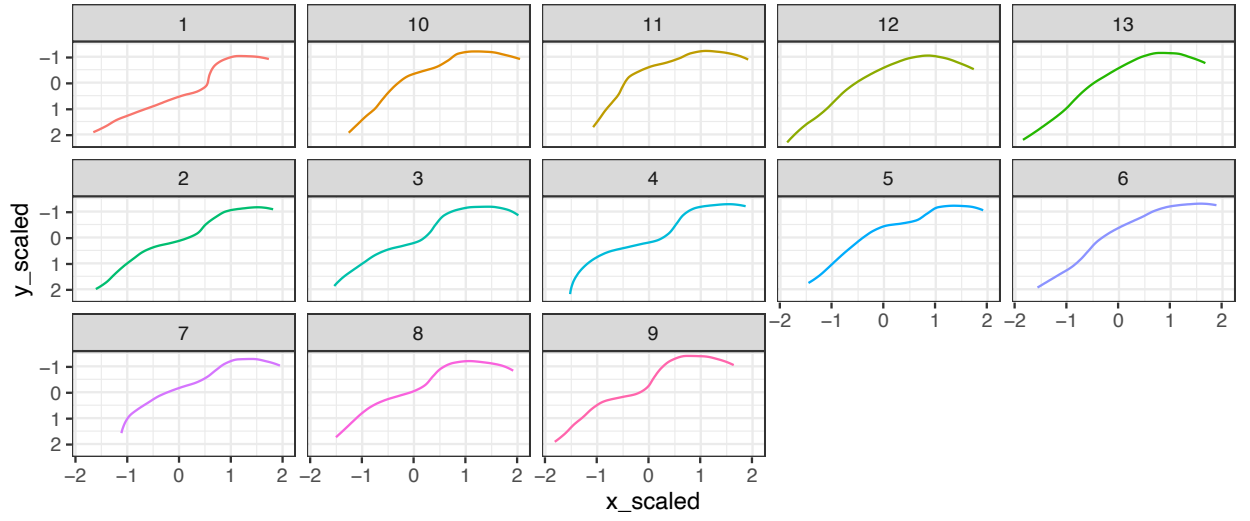

Scaled x/y – Subject 07F Target / t /

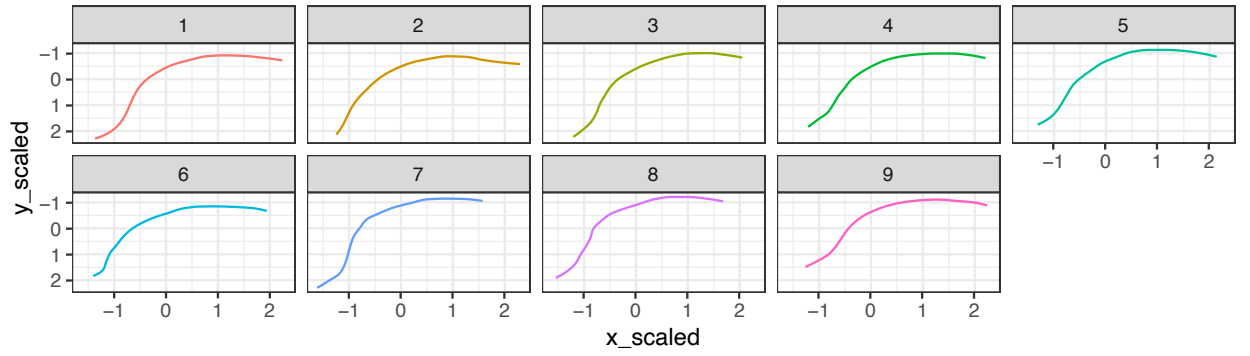



Scaled x/y – Subject 07F Target / w /

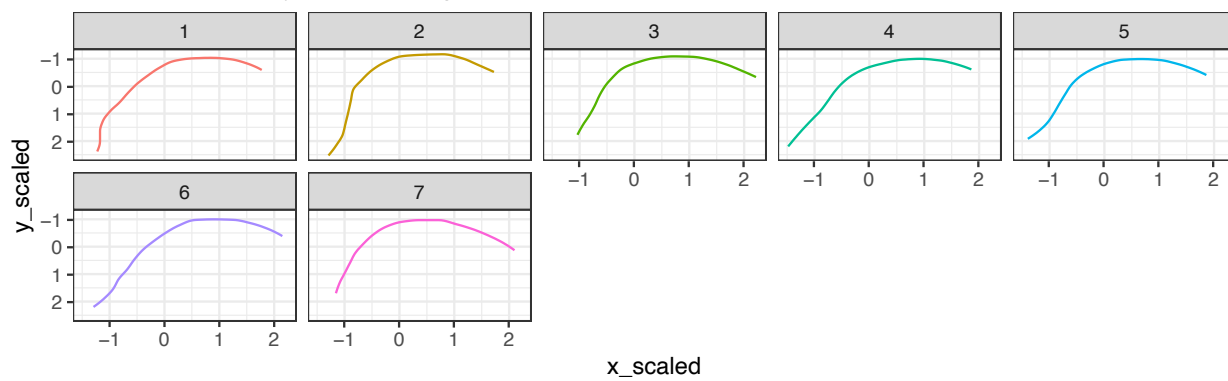

Scaled x/y – Subject 08F Target / ae /

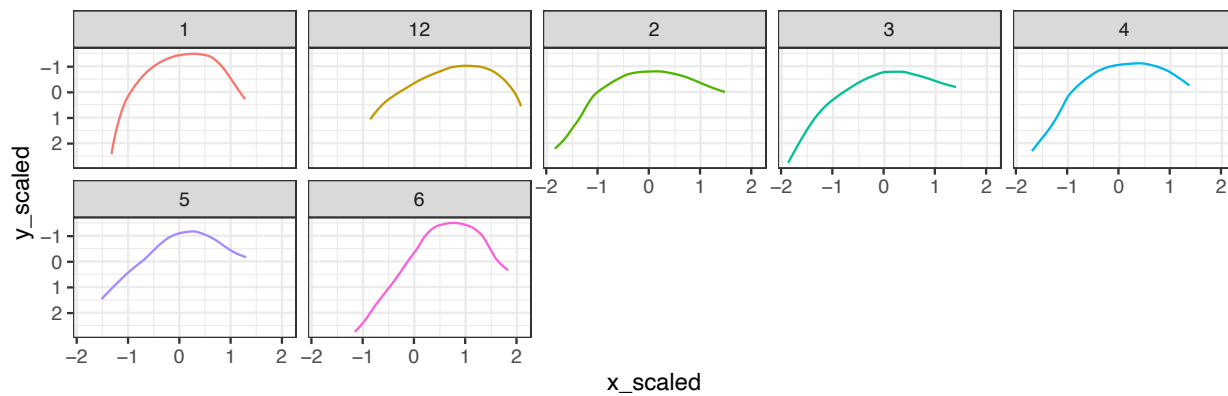

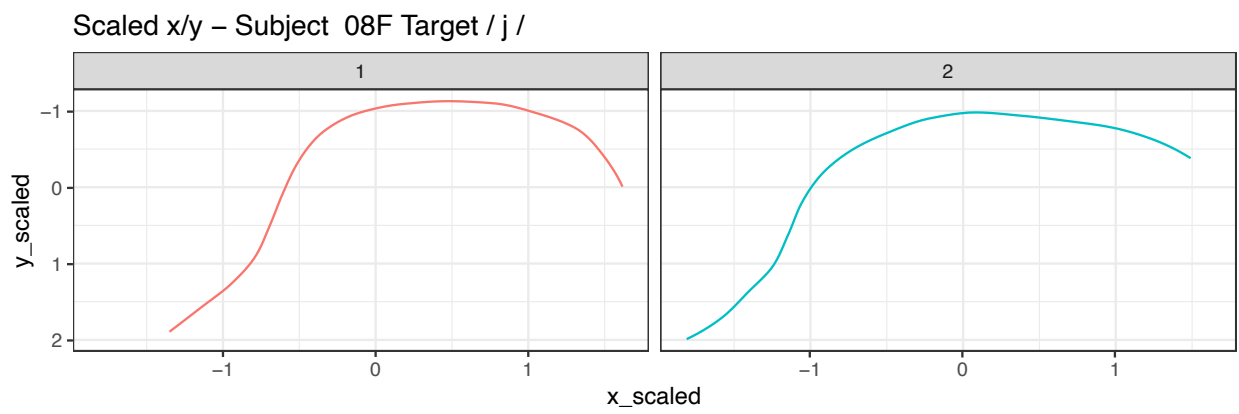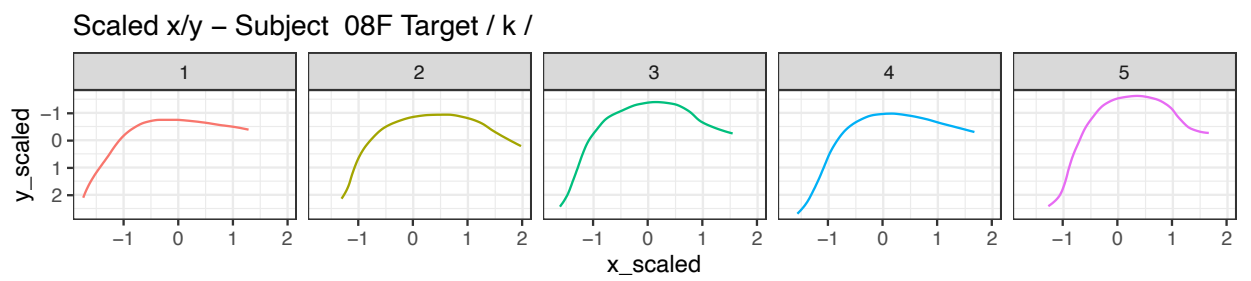

Scaled x/y – Subject 08F Target / l /

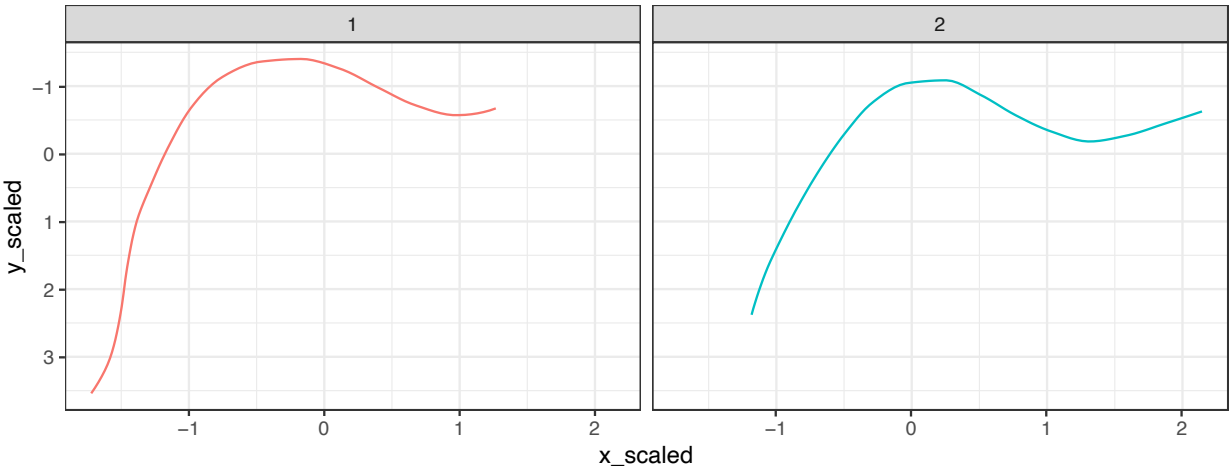

Scaled x/y – Subject 08F Target / r /

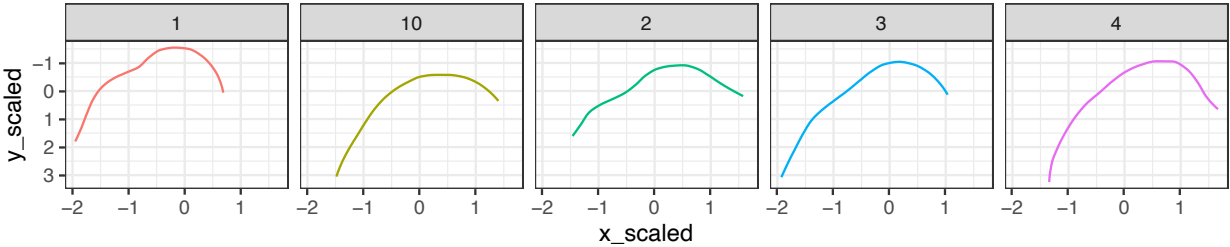

Scaled x/y – Subject 08F Target / t /

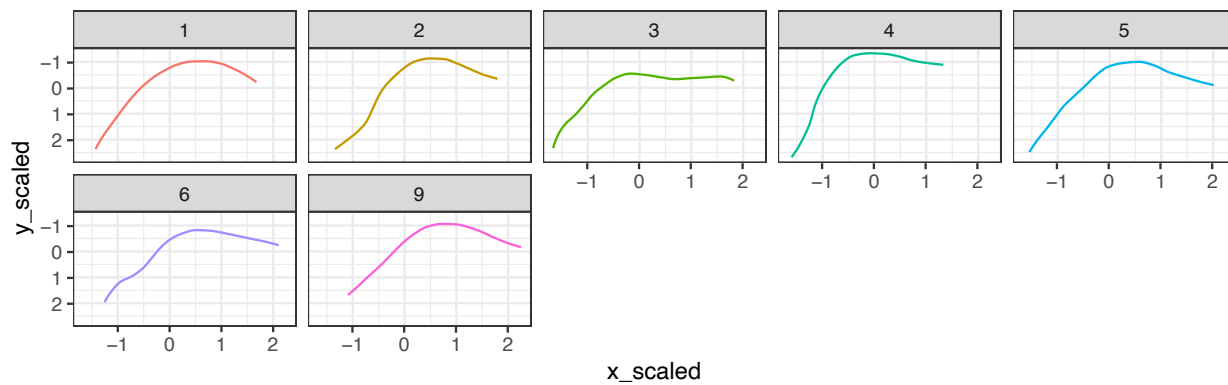

Scaled x/y – Subject 08F Target / w /

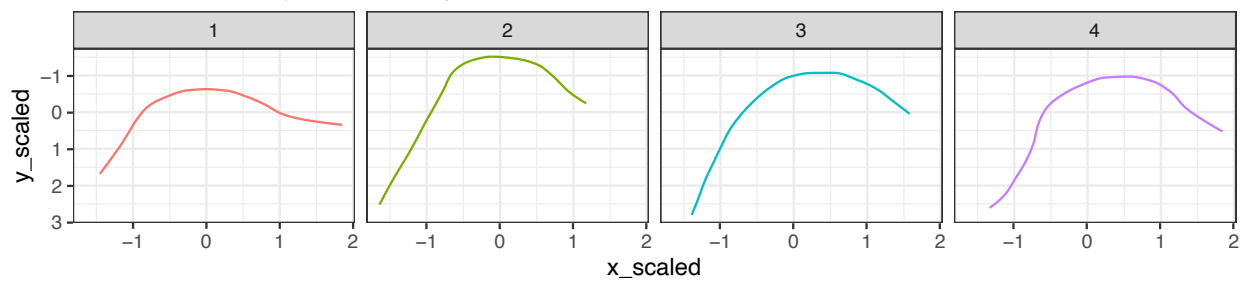

Scaled x/y – Subject 09F Target / ae /

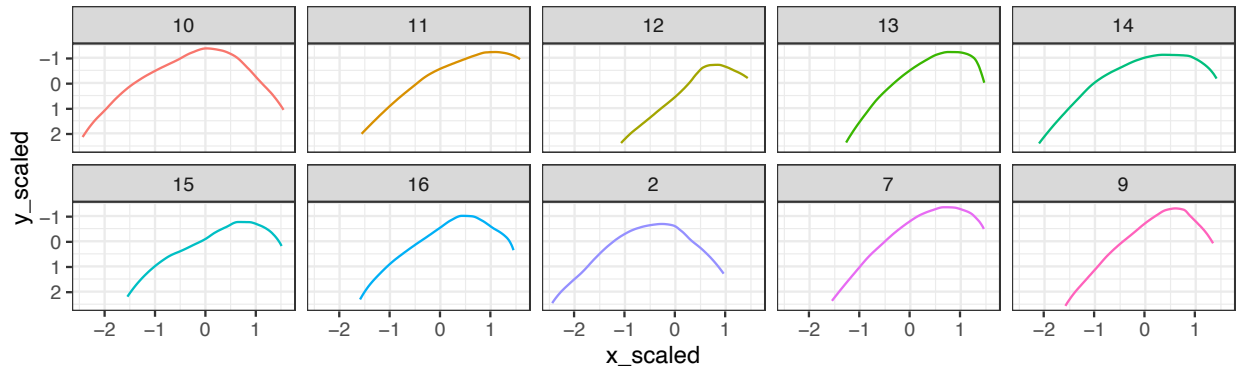

Scaled x/y – Subject 09F Target / j /

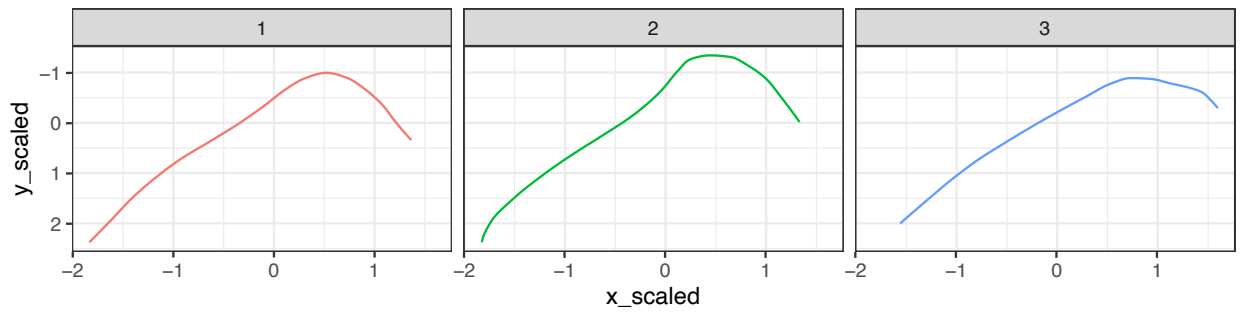

Scaled x/y – Subject 09F Target / k /

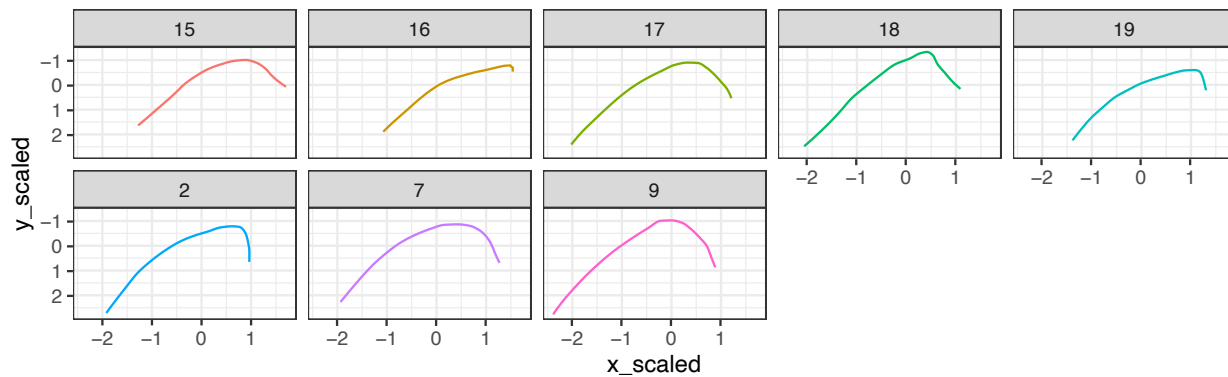

Scaled x/y – Subject 09F Target / l /

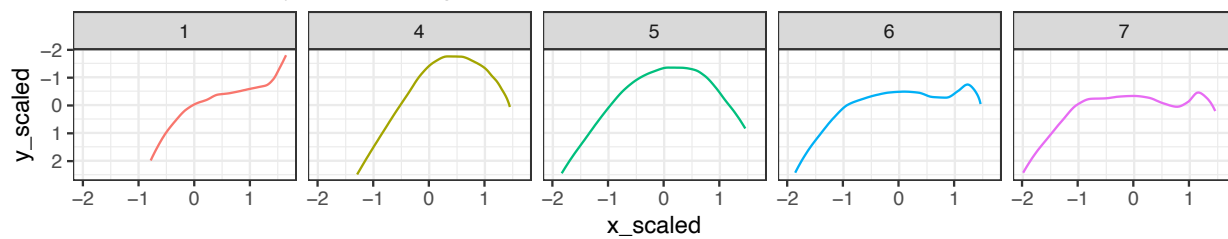

Scaled x/y – Subject 09F Target / r /

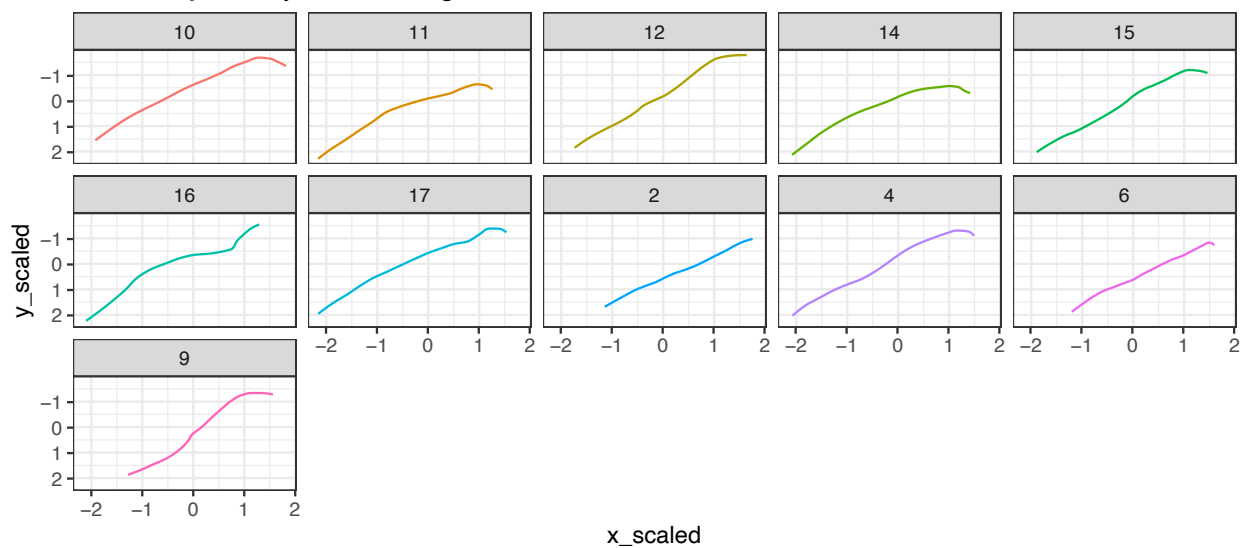

Scaled x/y – Subject 09F Target / t /

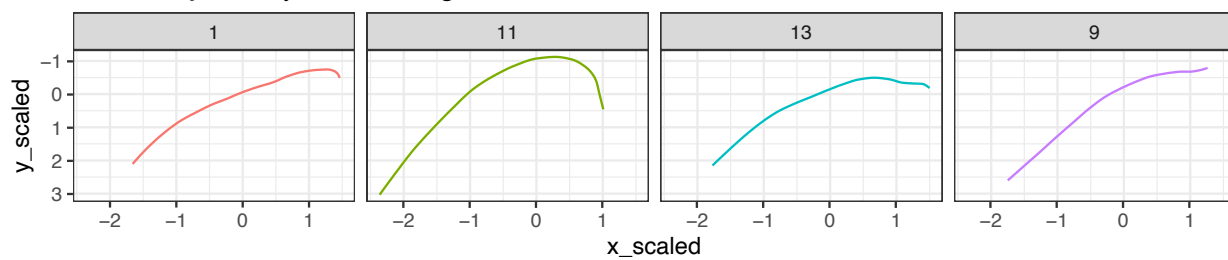

Scaled x/y – Subject 09F Target / w /

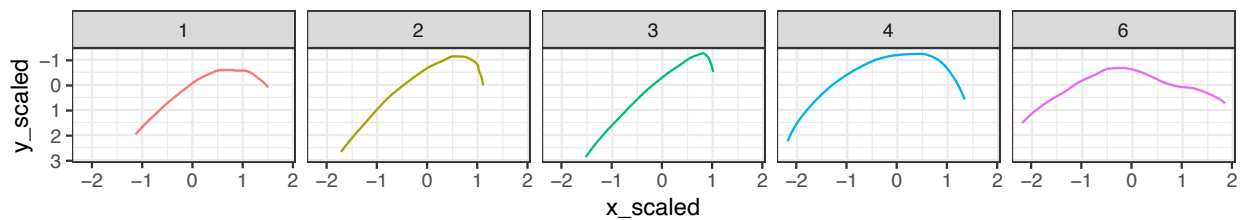

Scaled x/y – Subject 10F Target / ae /

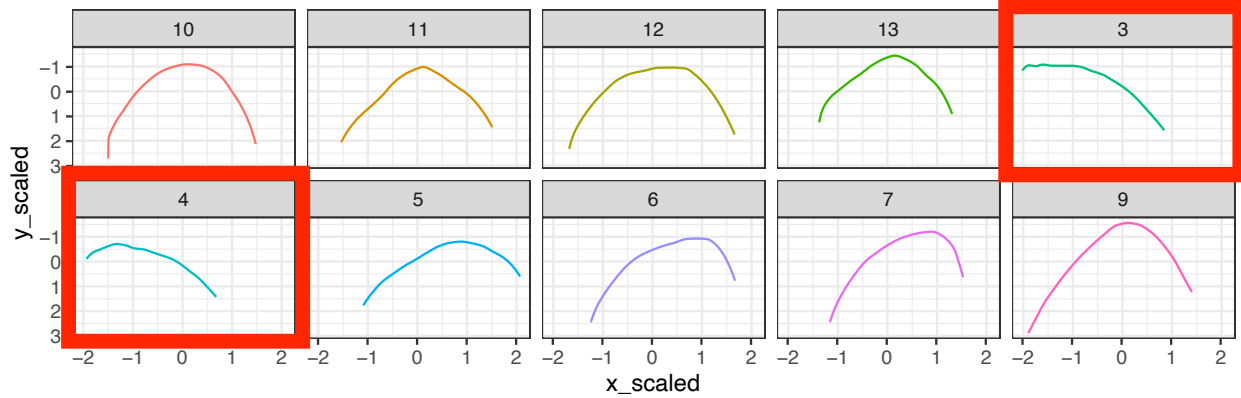



Scaled x/y – Subject 10F Target / j /

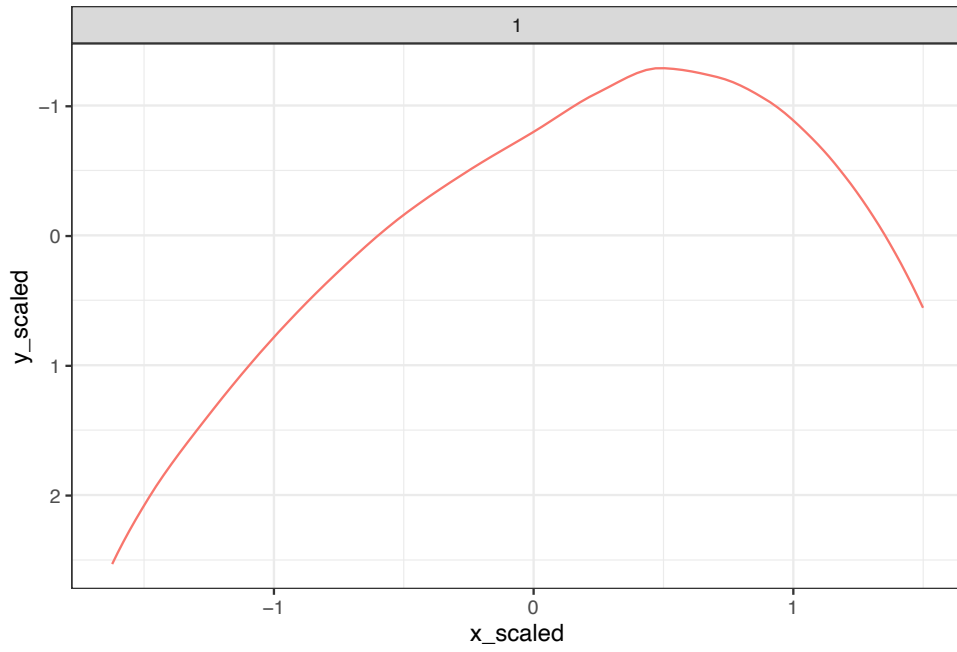

Scaled x/y – Subject 10F Target / k /

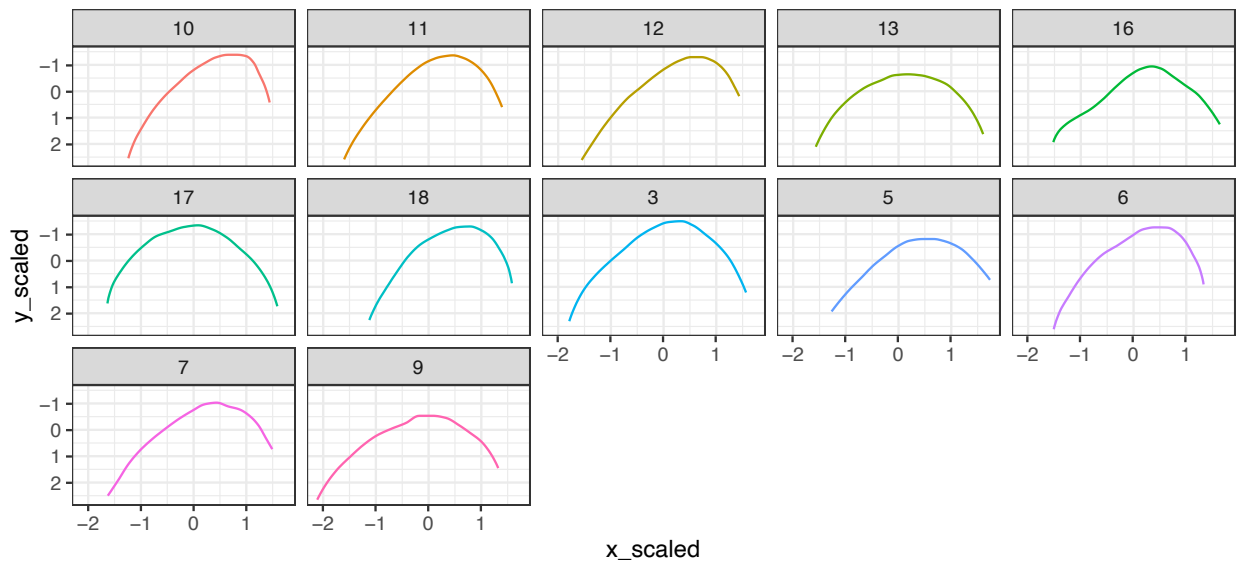

Scaled x/y – Subject 10F Target / l /

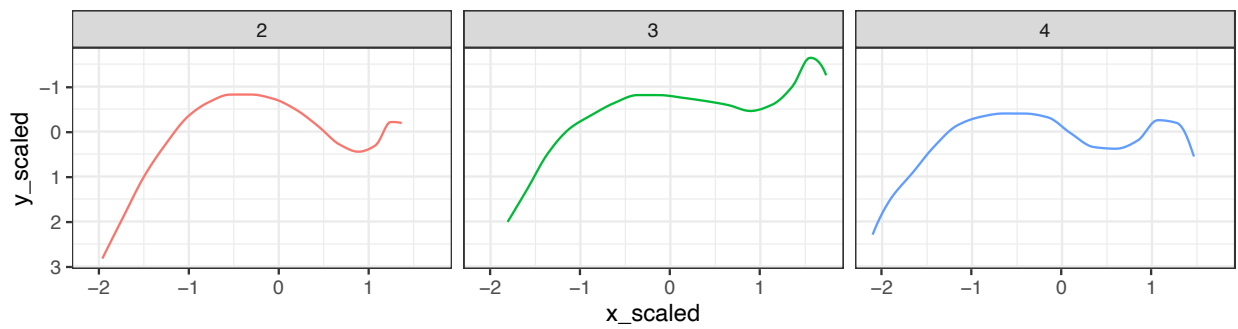

Scaled x/y – Subject 10F Target / r /

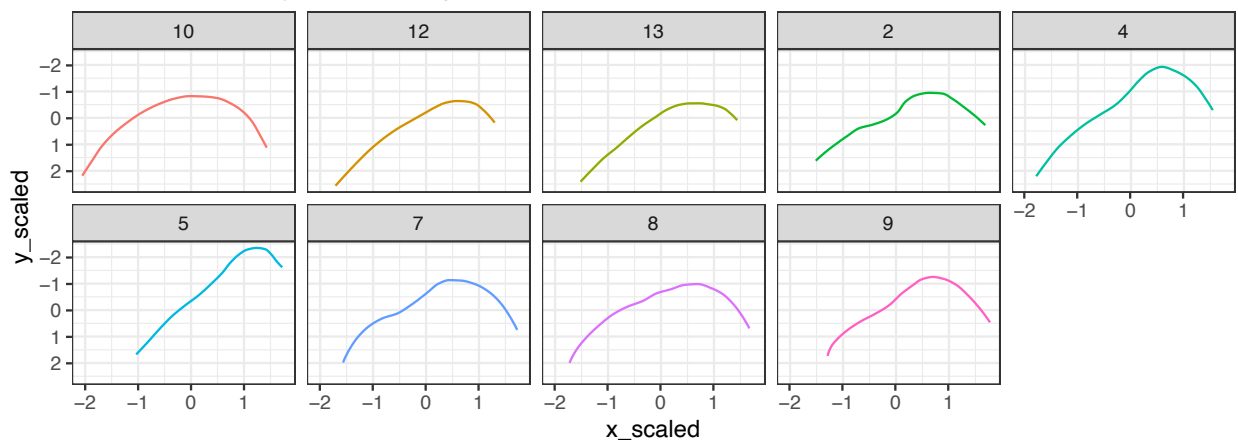

Scaled x/y – Subject 10F Target / t /

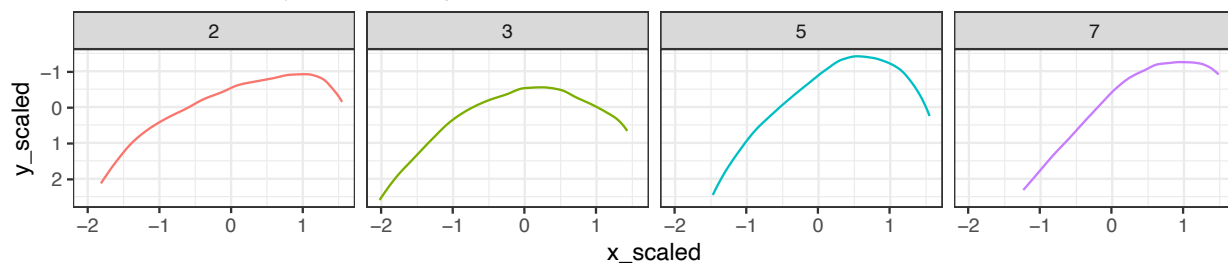

Scaled x/y – Subject 10F Target / w /

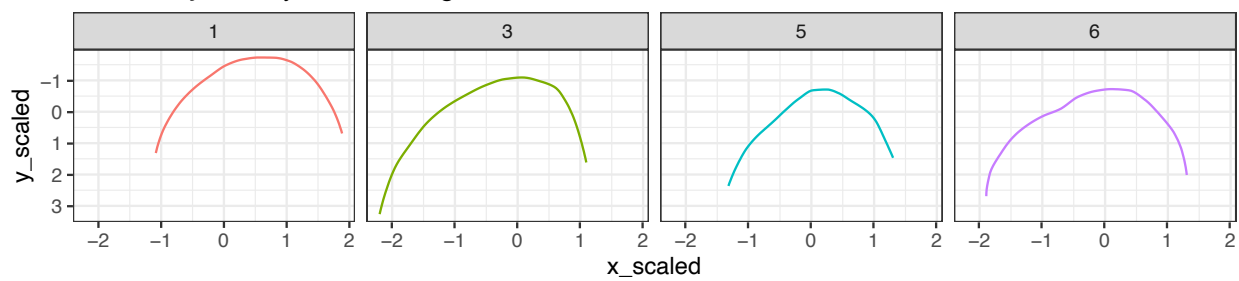

Scaled x/y – Subject 11F Target / ae /

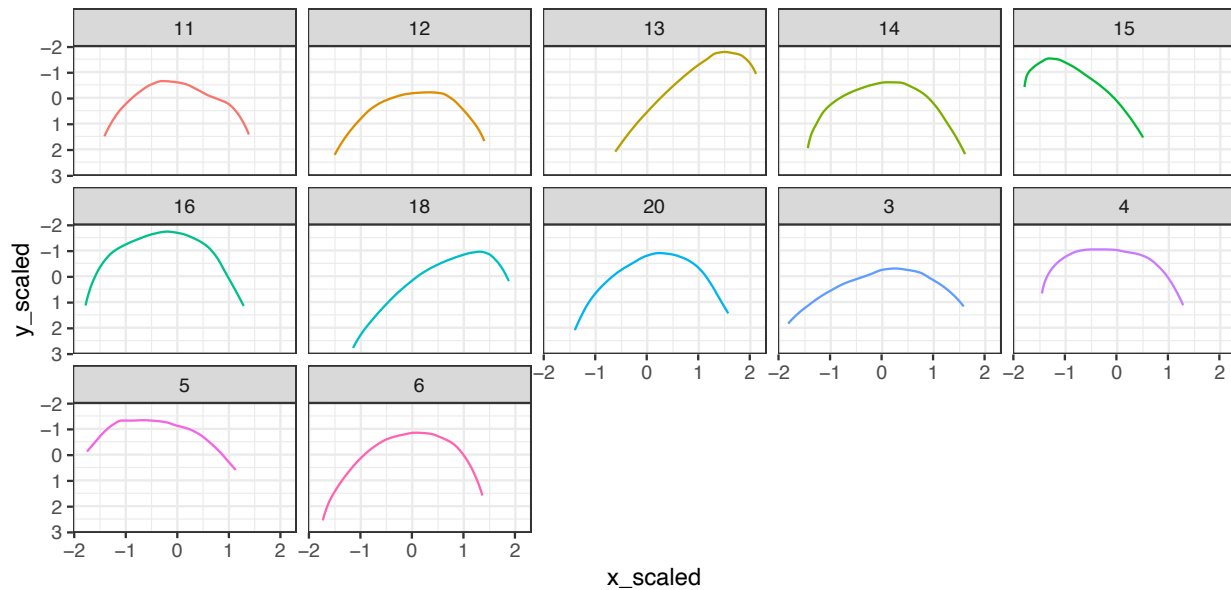

Scaled x/y – Subject 11F Target / j /

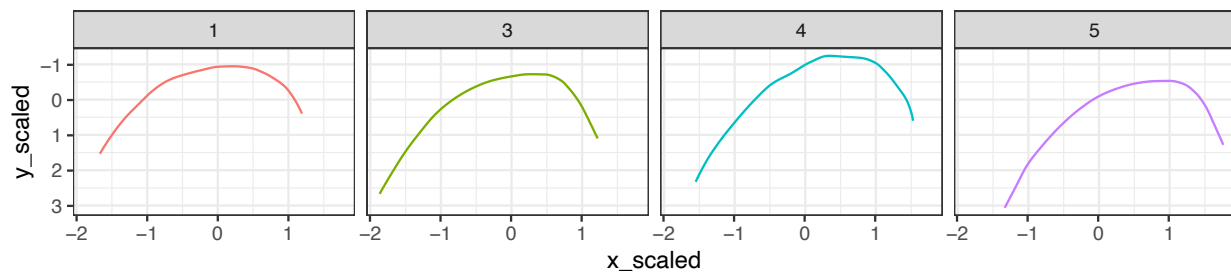

Scaled x/y – Subject 11F Target / k /

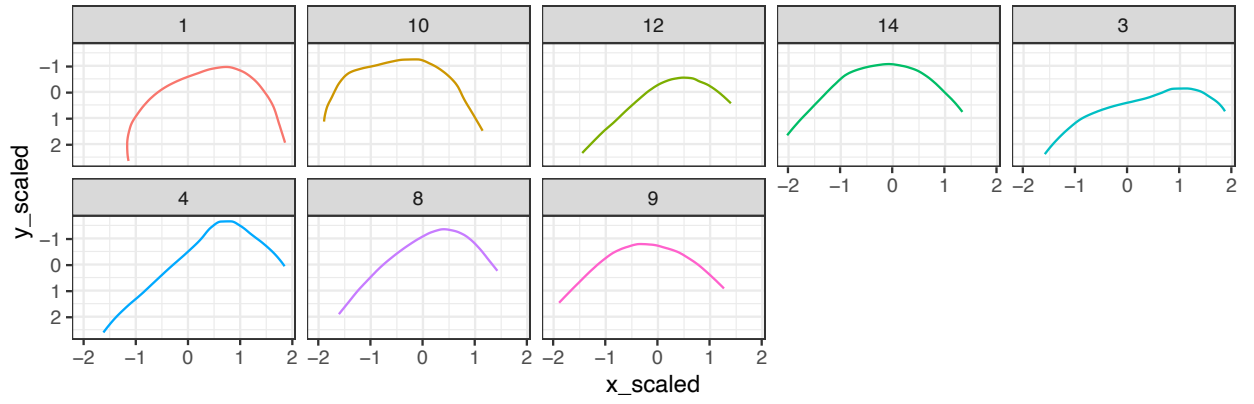

Scaled x/y – Subject 11F Target / l /

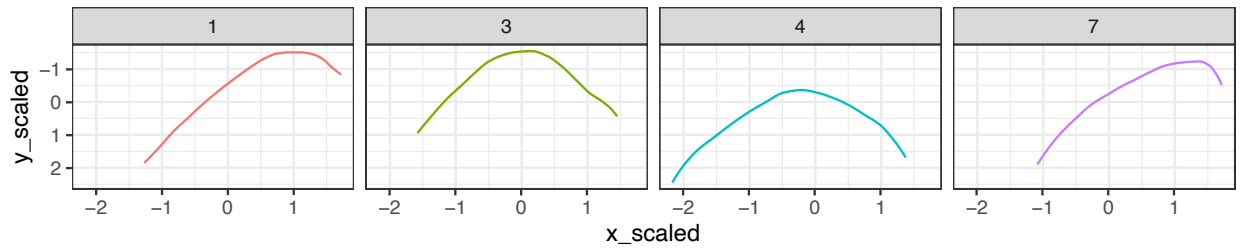

Scaled x/y – Subject 11F Target / r /

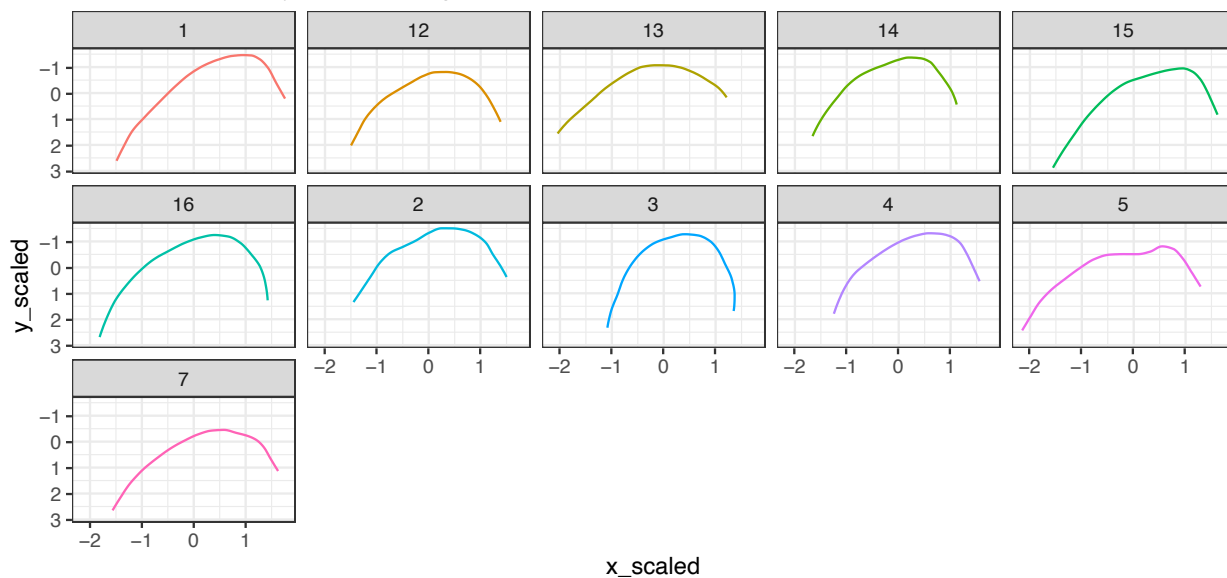

Scaled x/y – Subject 11F Target / t /

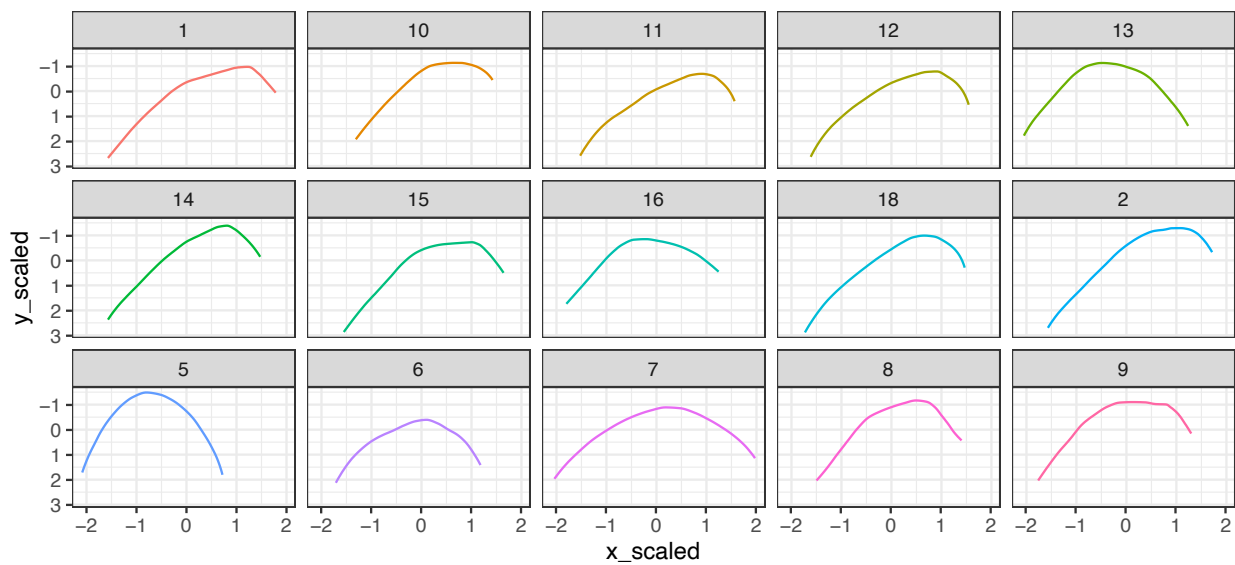

Scaled x/y – Subject 11F Target / w /

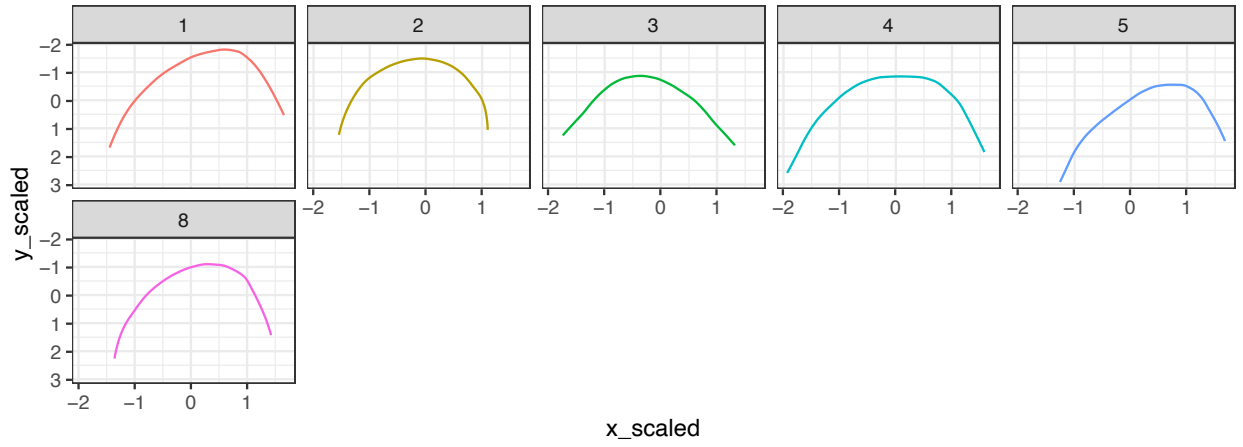

Scaled x/y – Subject 12M Target / ae /

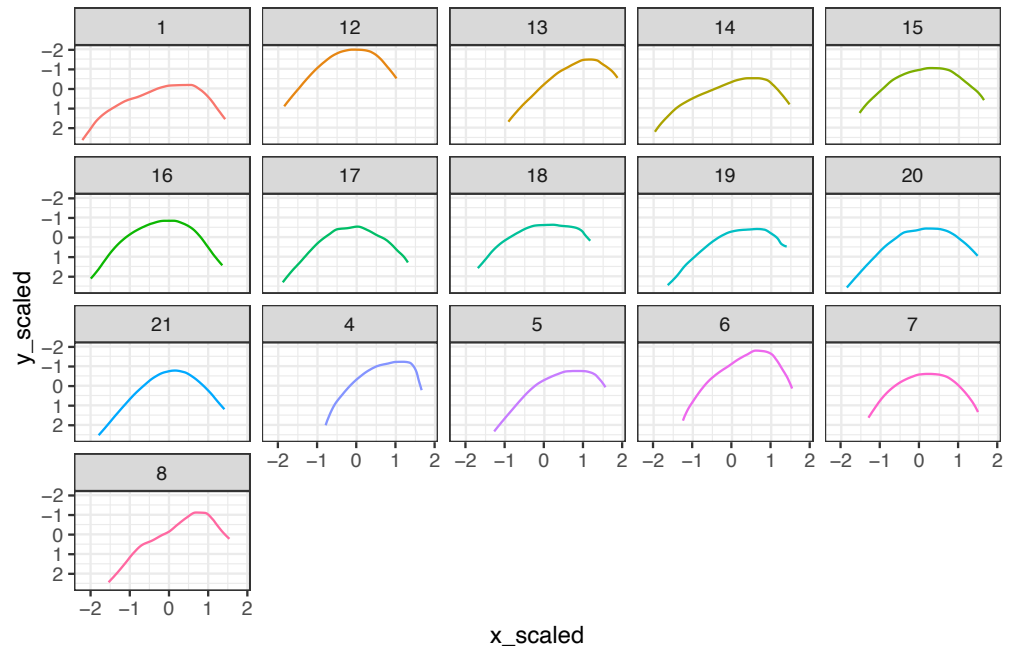

Scaled x/y – Subject 12M Target / j /

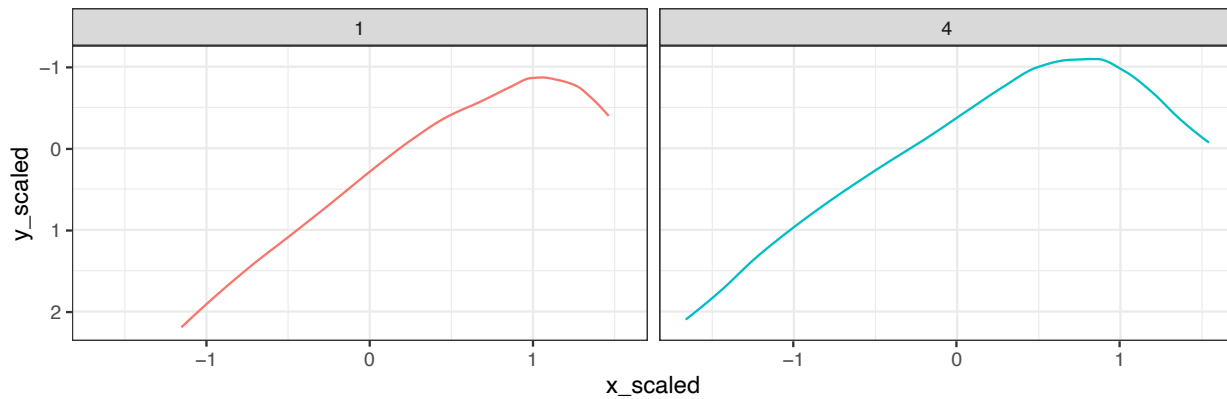

Scaled x/y – Subject 12M Target / k /

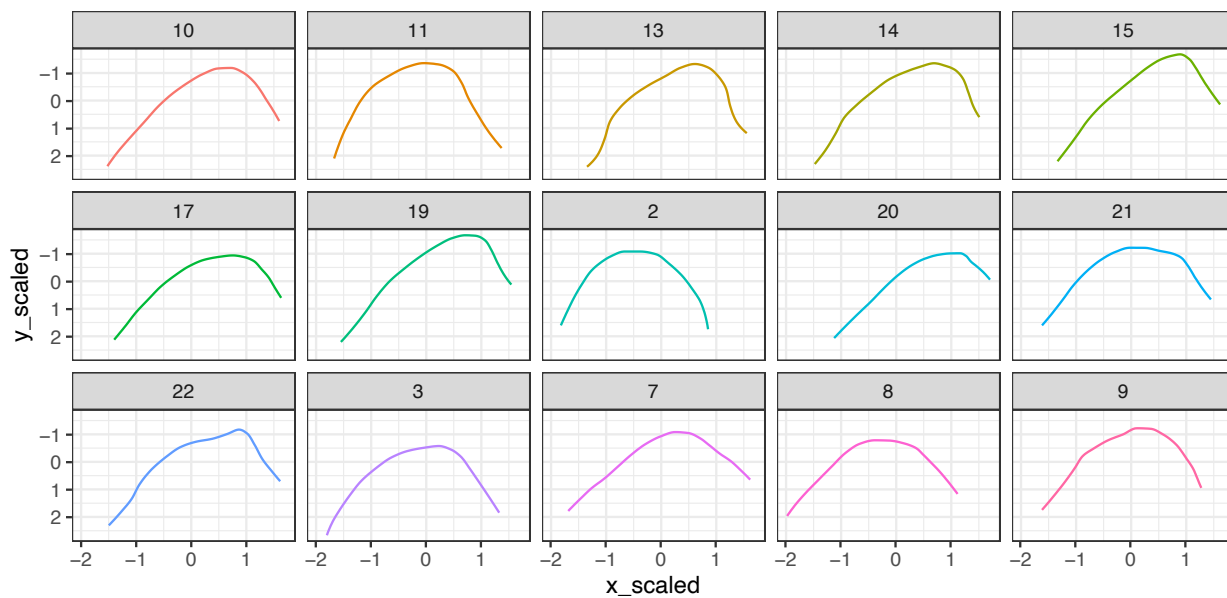



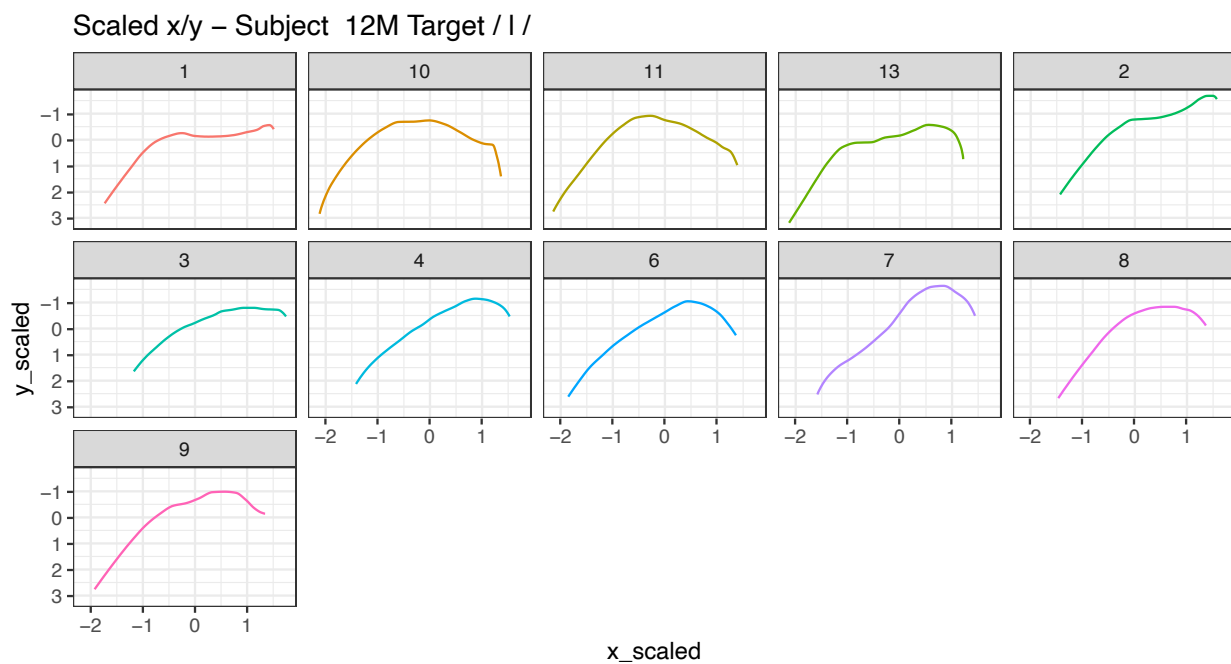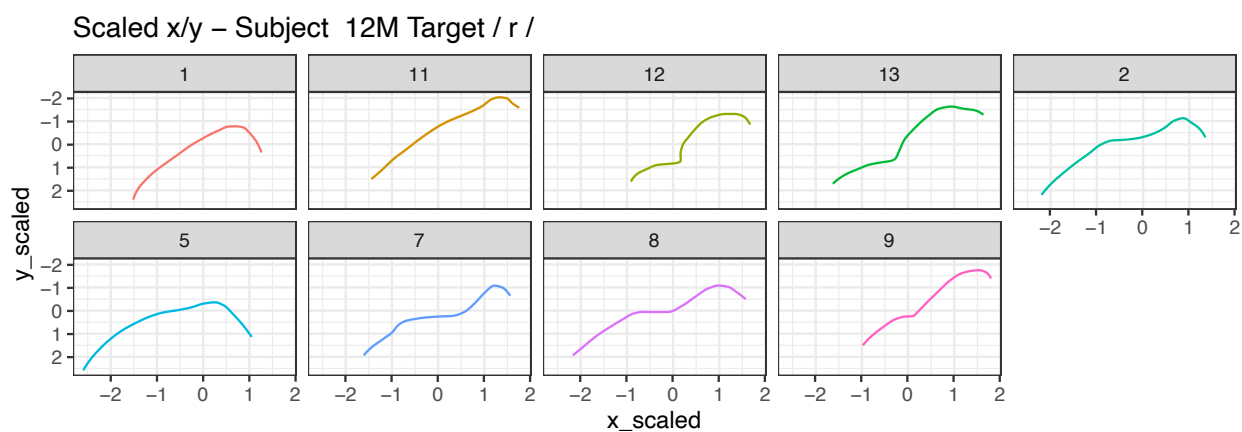

Scaled x/y – Subject 12M Target / t /

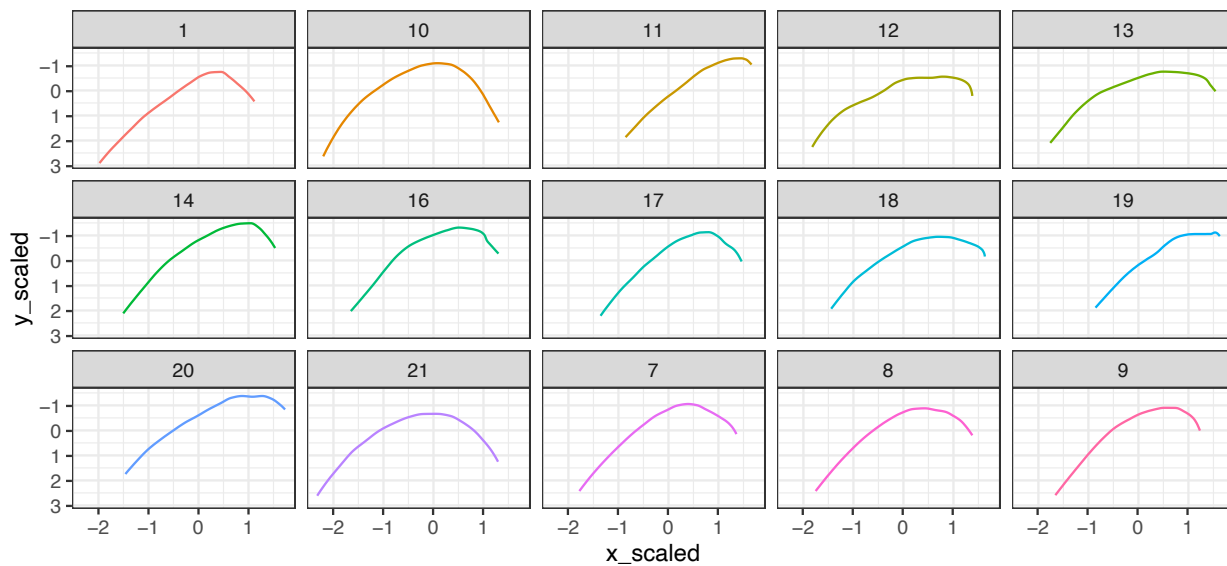

Scaled x/y – Subject 12M Target / w /

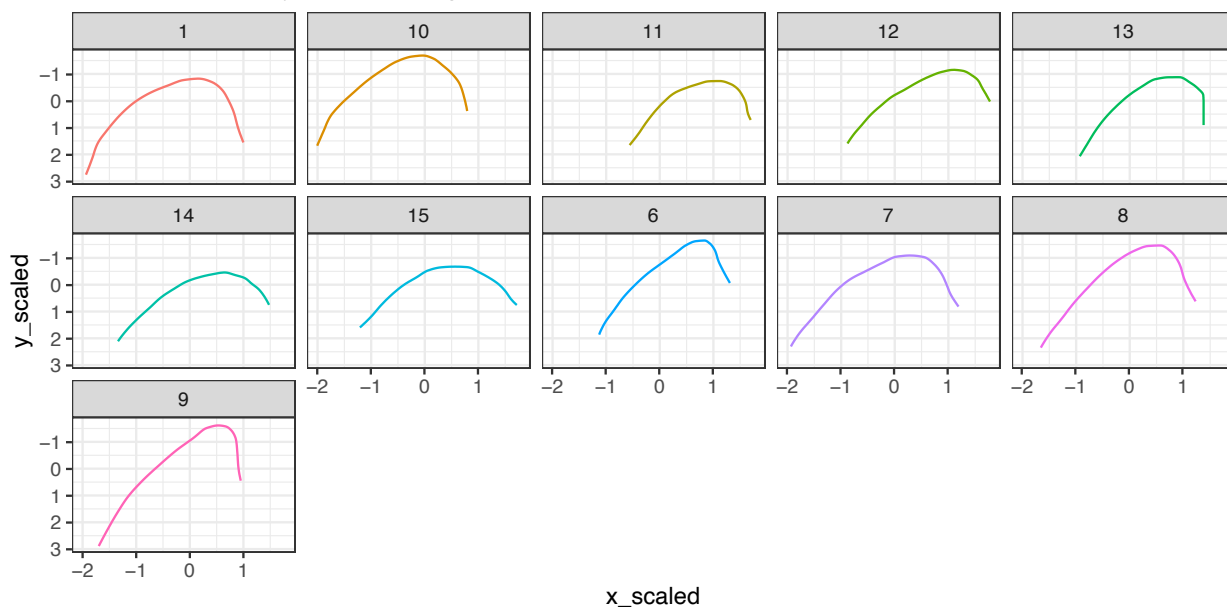

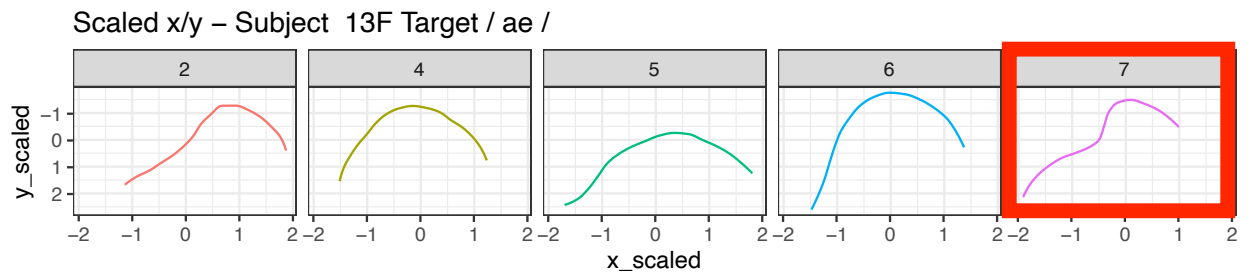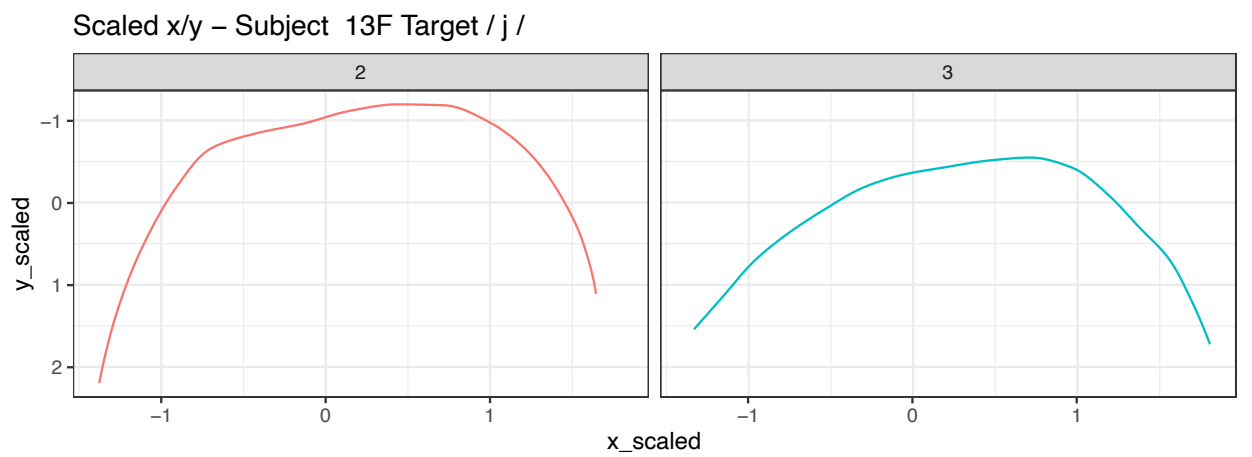

Scaled x/y – Subject 13F Target / k /

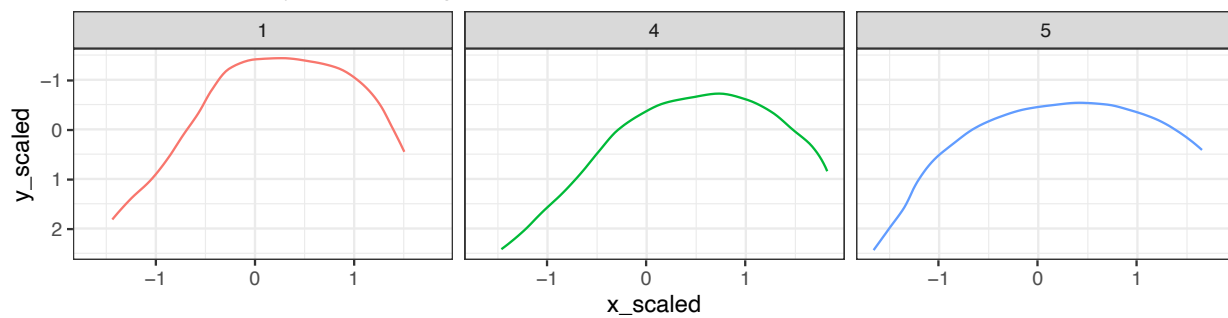

Scaled x/y – Subject 13F Target / l /

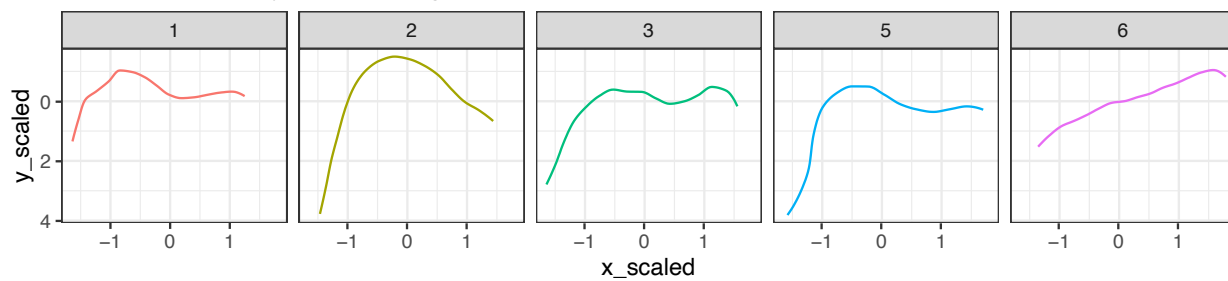

Scaled x/y – Subject 13F Target / r /

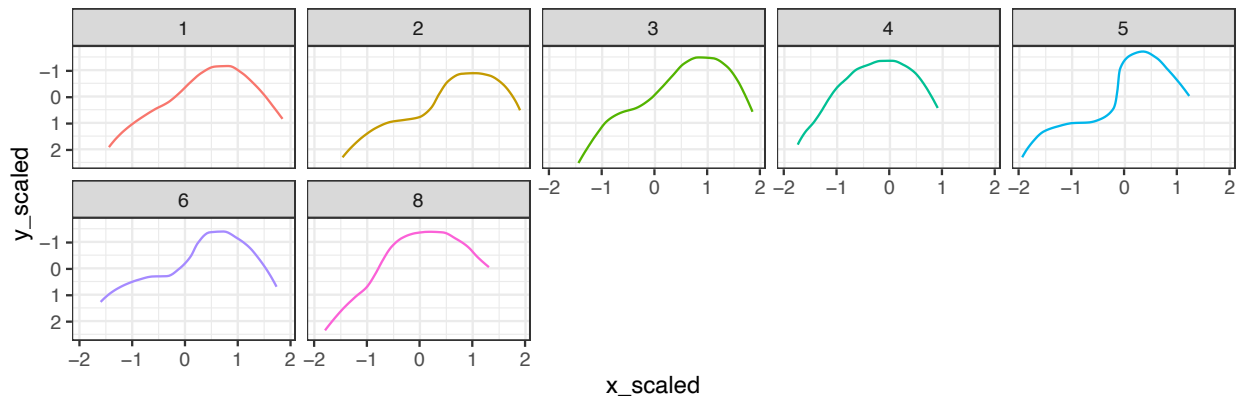

Scaled x/y – Subject 13F Target / t /

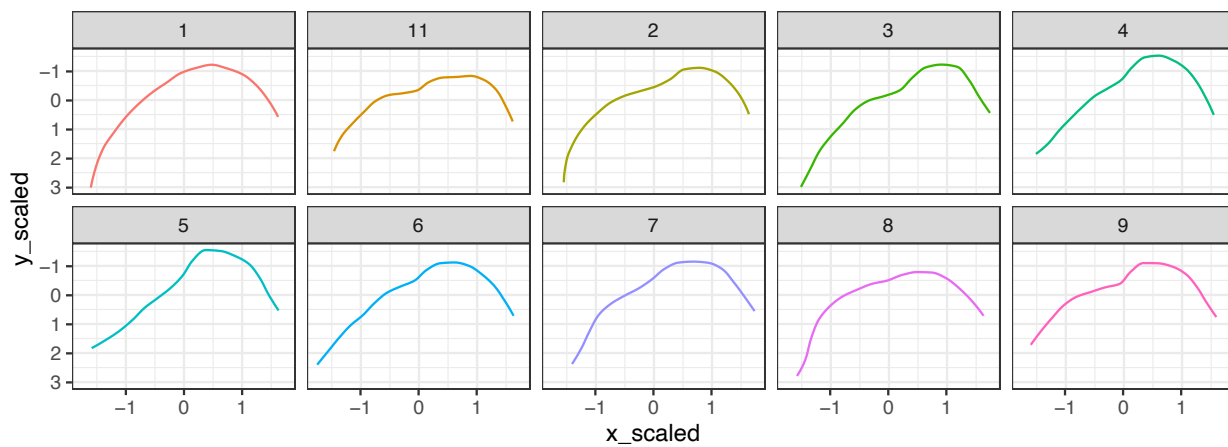

Scaled x/y – Subject 13F Target / w /

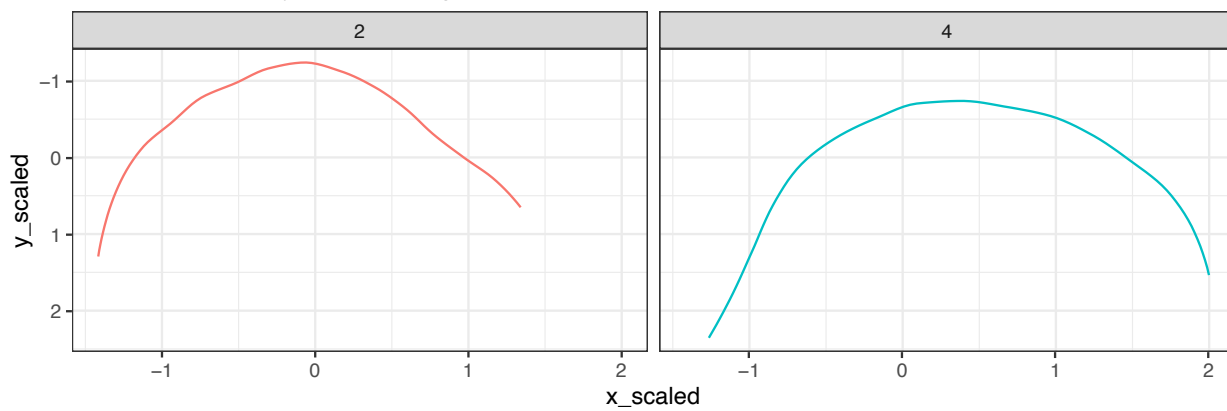

Scaled x/y – Subject 14F Target / ae /

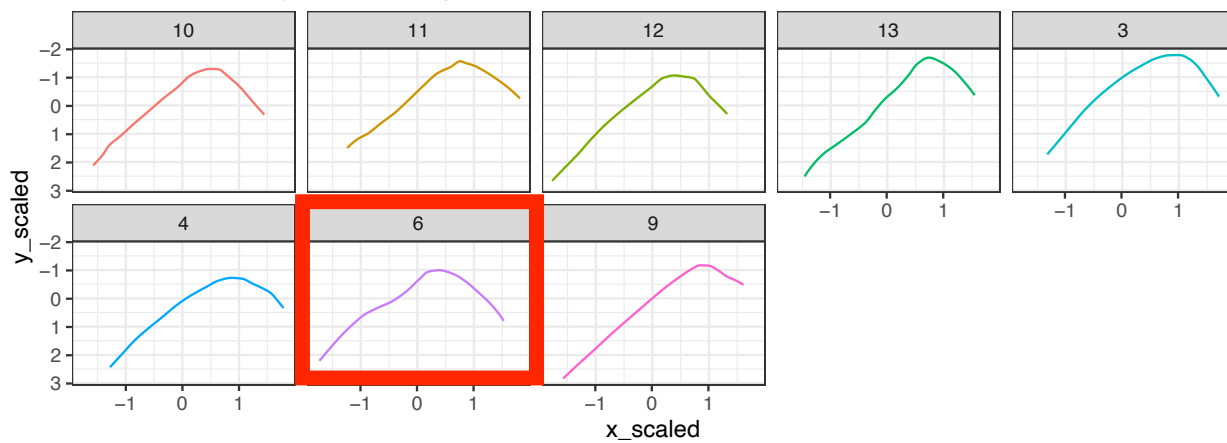

Scaled x/y – Subject 14F Target / k /

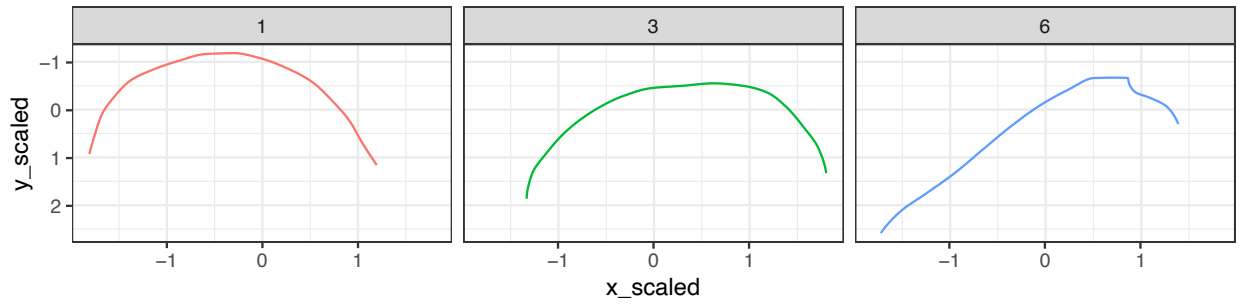

Scaled x/y – Subject 14F Target / l /

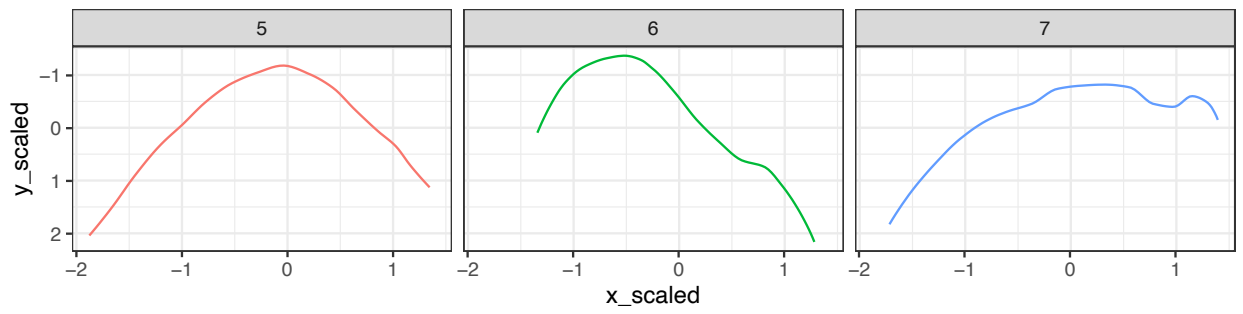

Scaled x/y – Subject 14F Target / r /

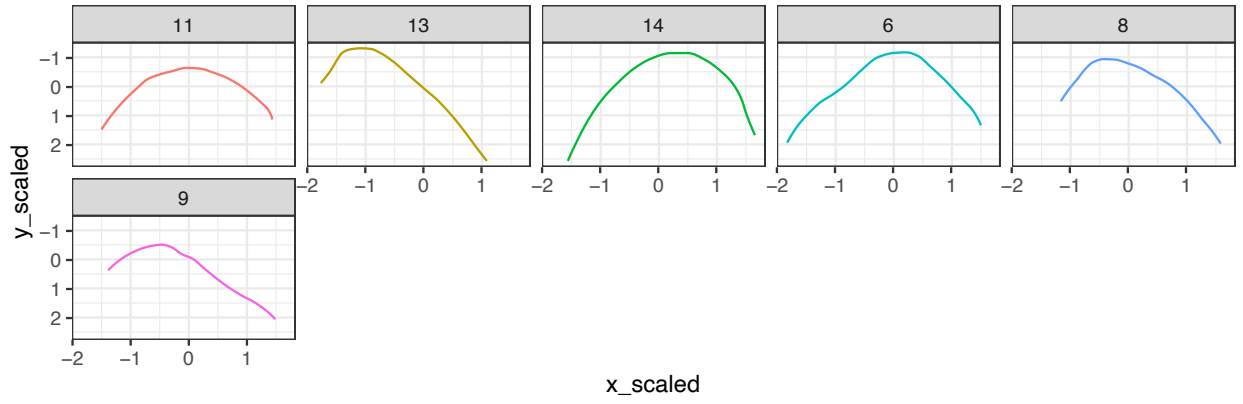

Scaled x/y – Subject 14F Target / t /

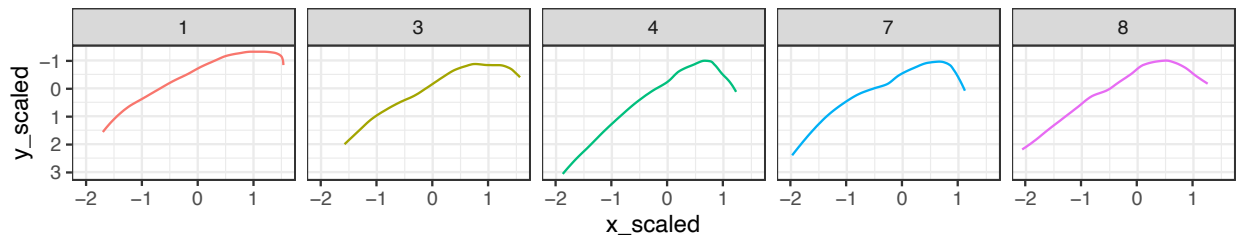



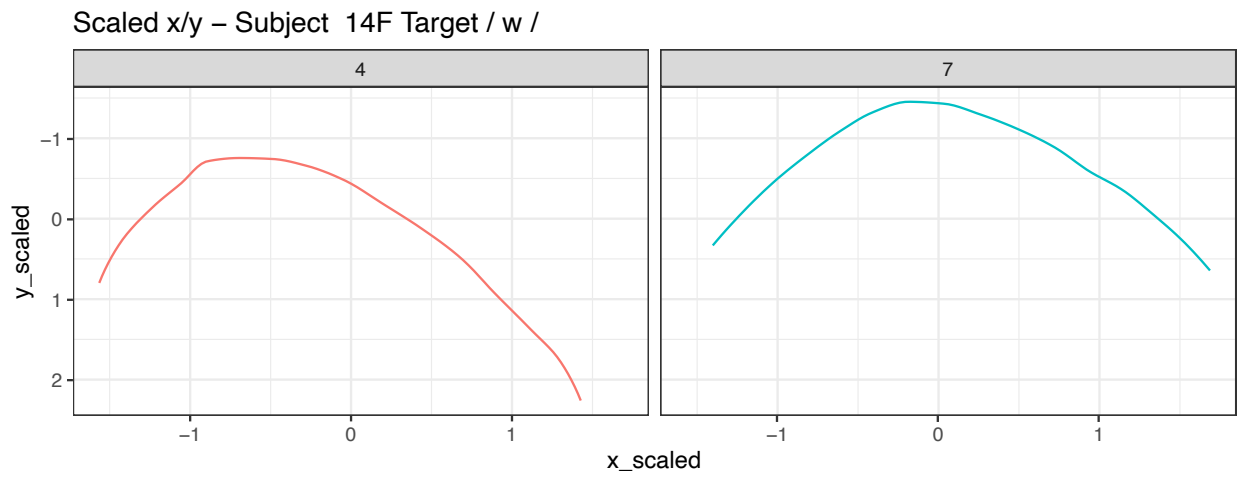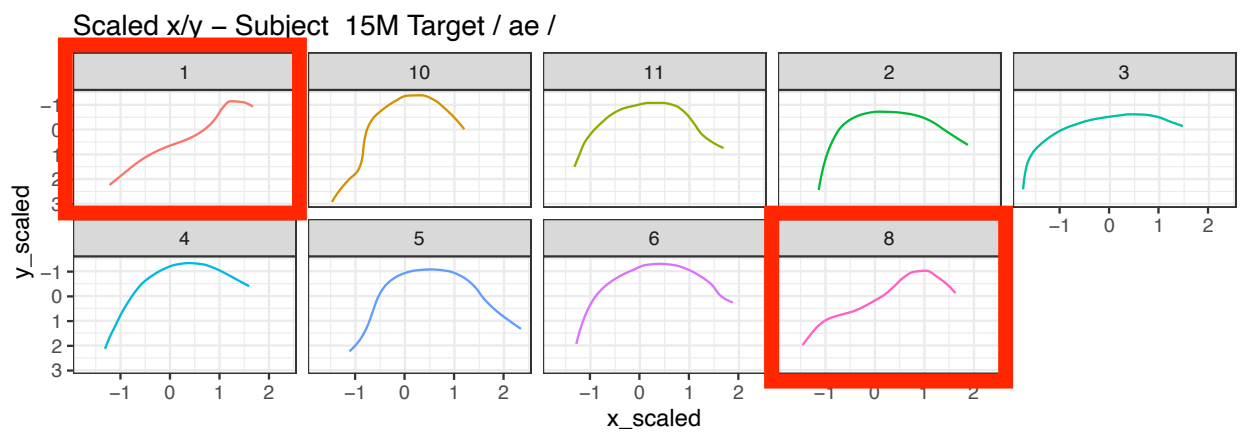

Scaled x/y – Subject 15M Target / j /

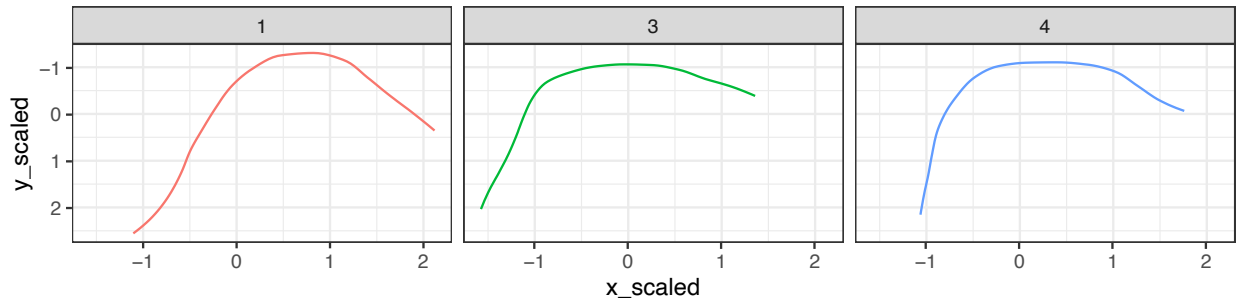

Scaled x/y – Subject 15M Target / k /

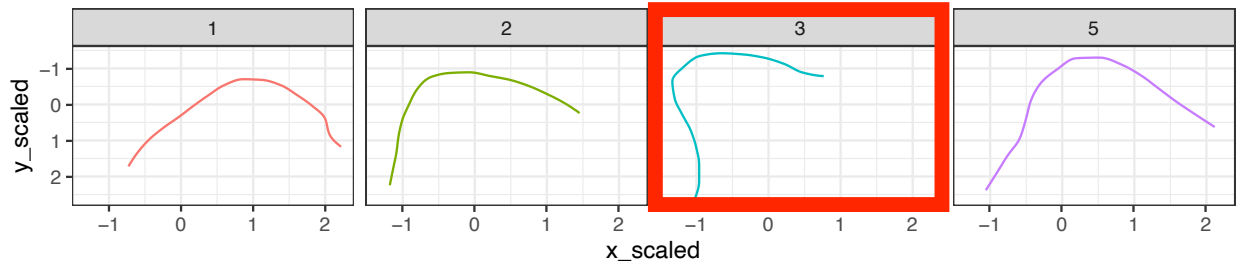

Scaled x/y – Subject 15M Target / I /

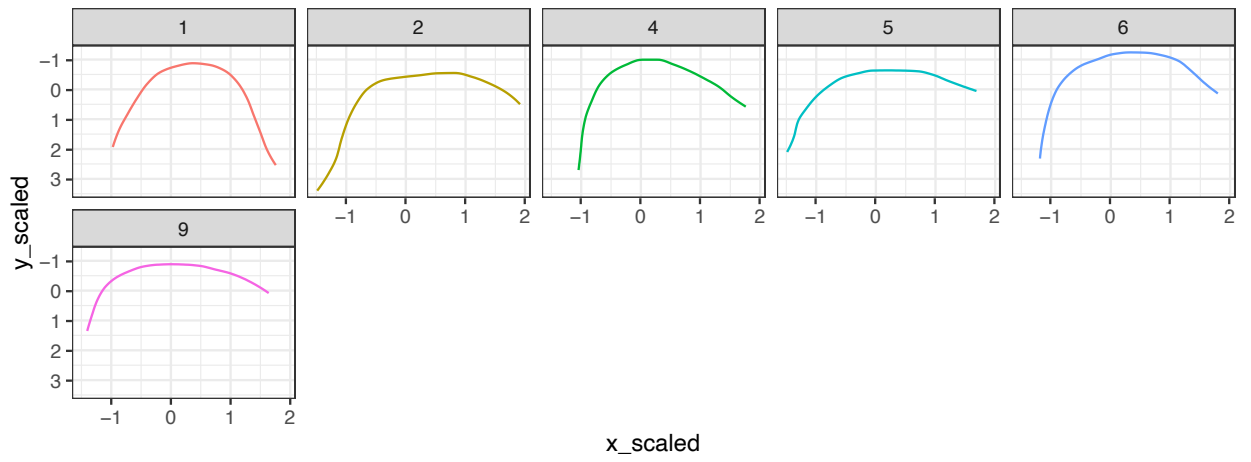

Scaled x/y – Subject 15M Target / r /

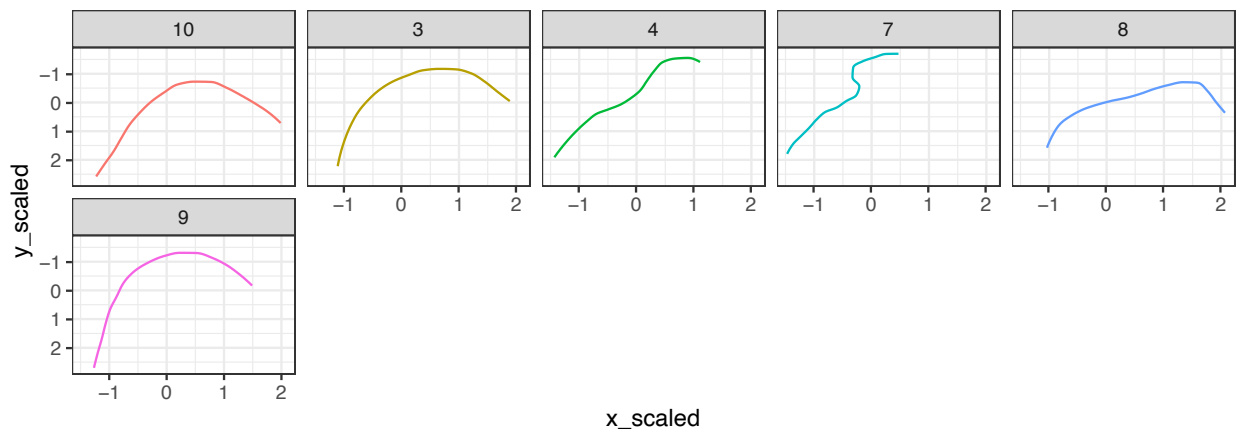

Scaled x/y – Subject 15M Target / t /

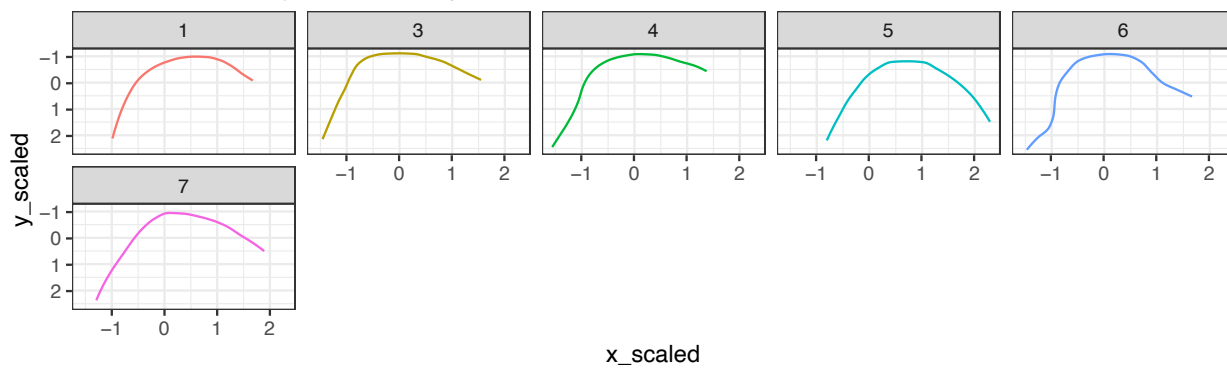

Scaled x/y – Subject 15M Target / w /

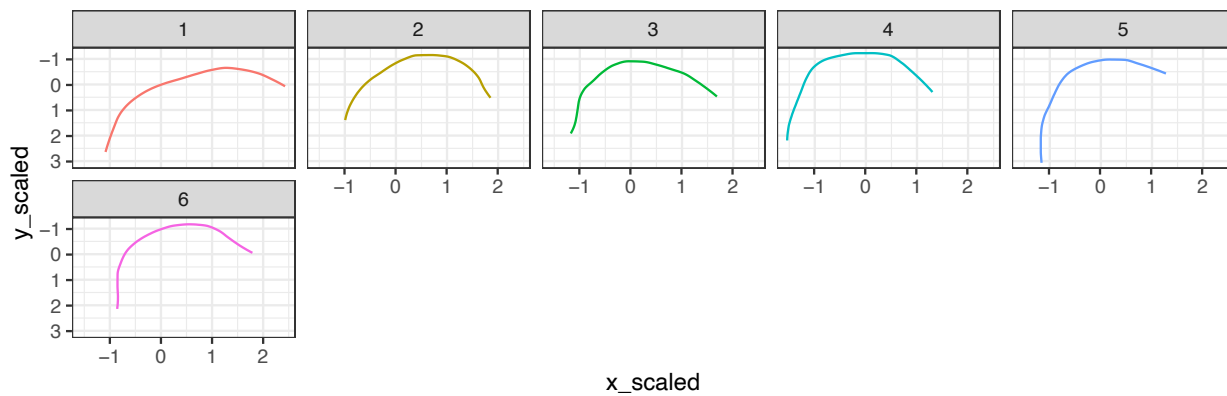

Scaled x/y – Subject 16F Target / ae /

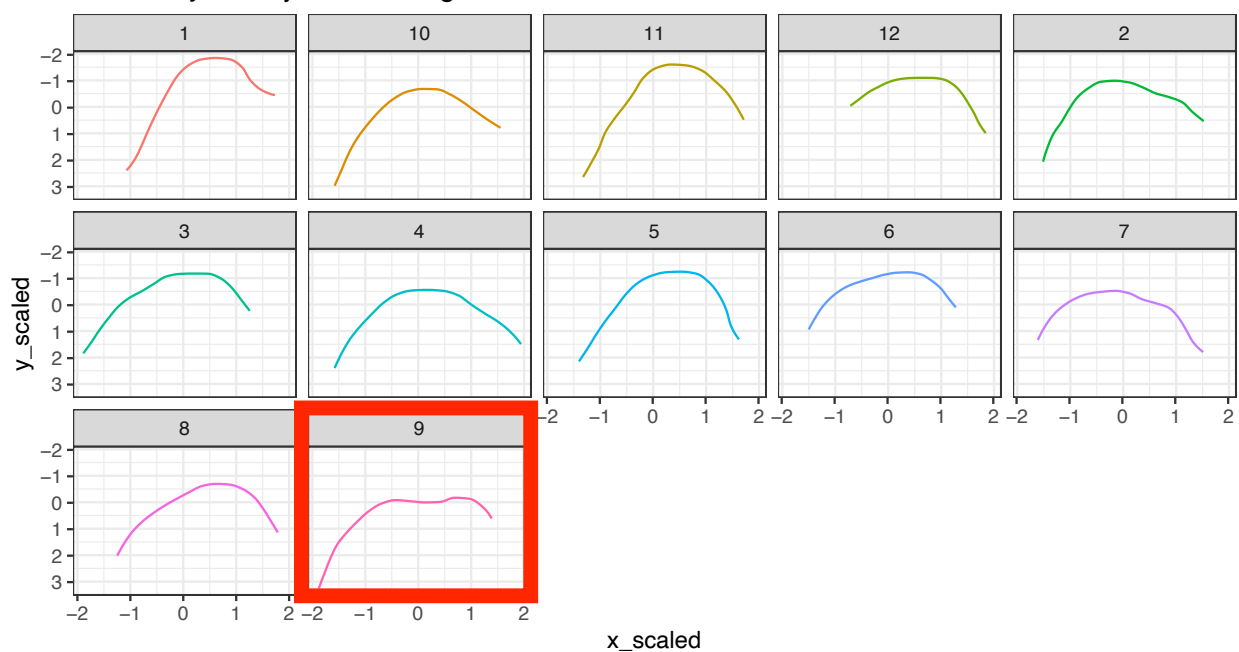

Scaled x/y – Subject 16F Target / j /

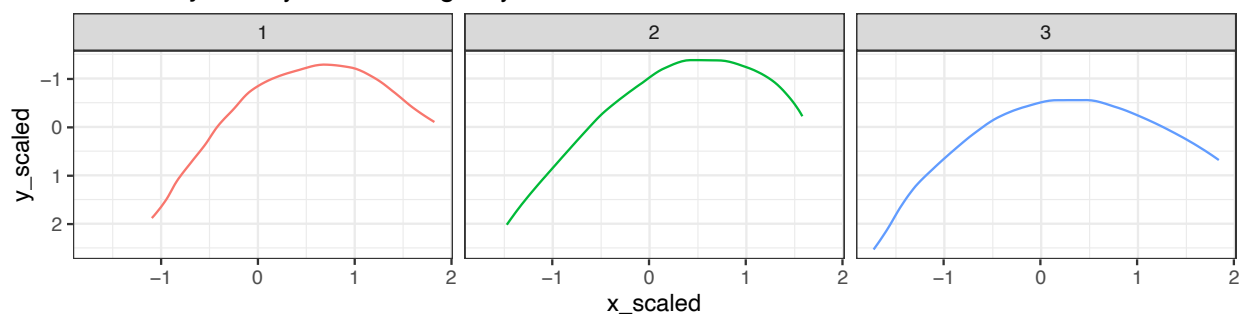

Scaled x/y – Subject 16F Target / k /

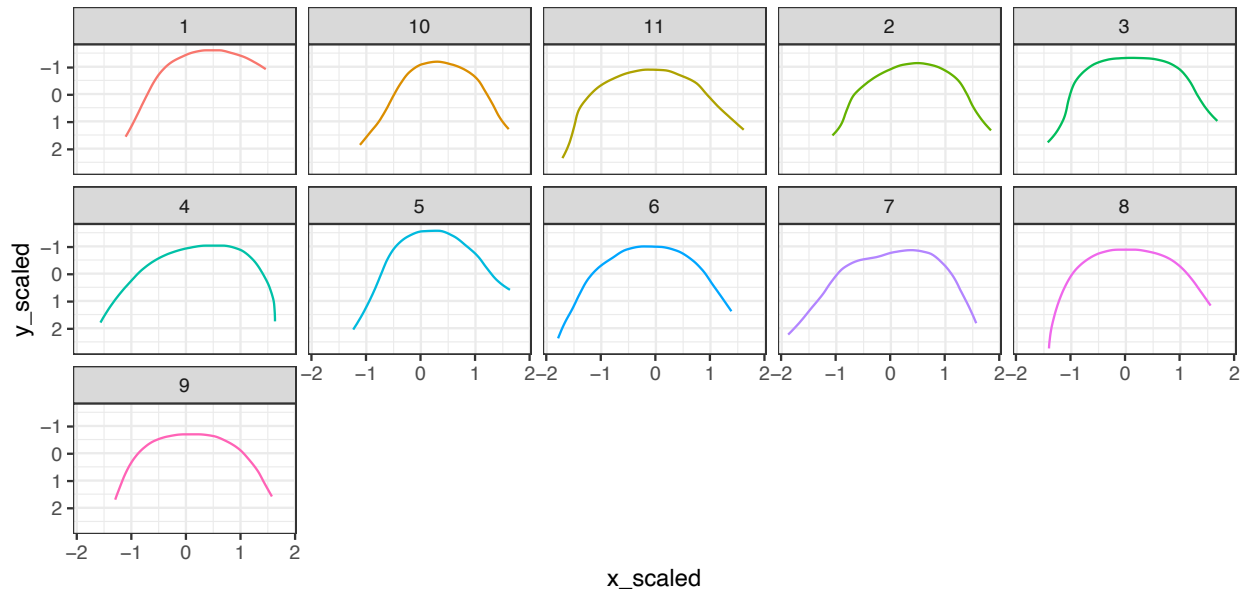

Scaled x/y – Subject 16F Target / l /

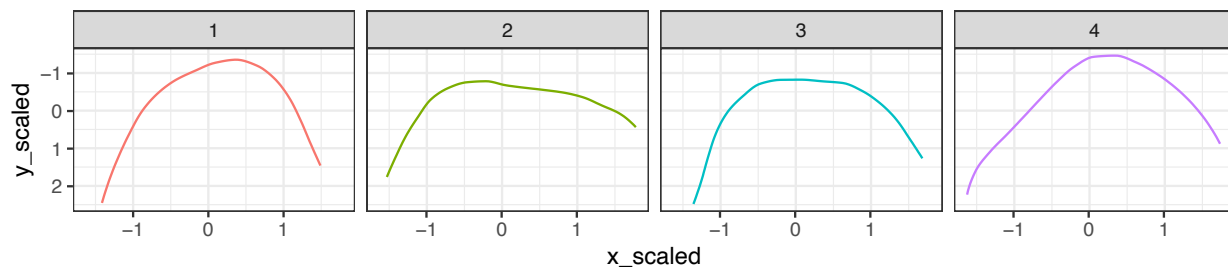

Scaled x/y – Subject 16F Target / r /

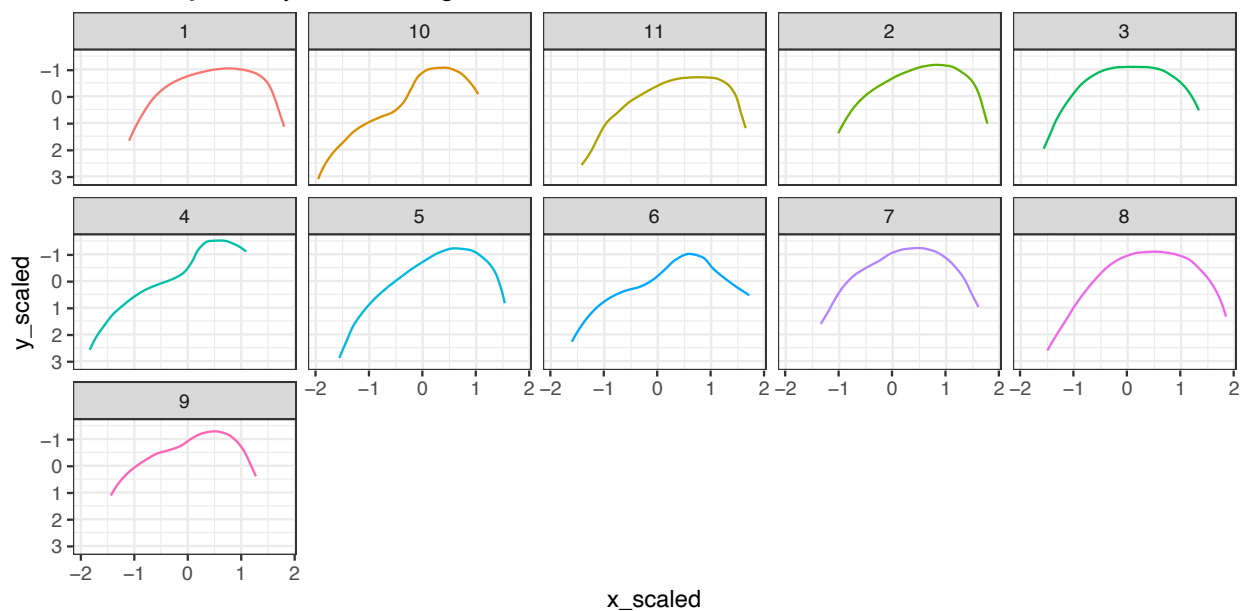

Scaled x/y – Subject 16F Target / t /

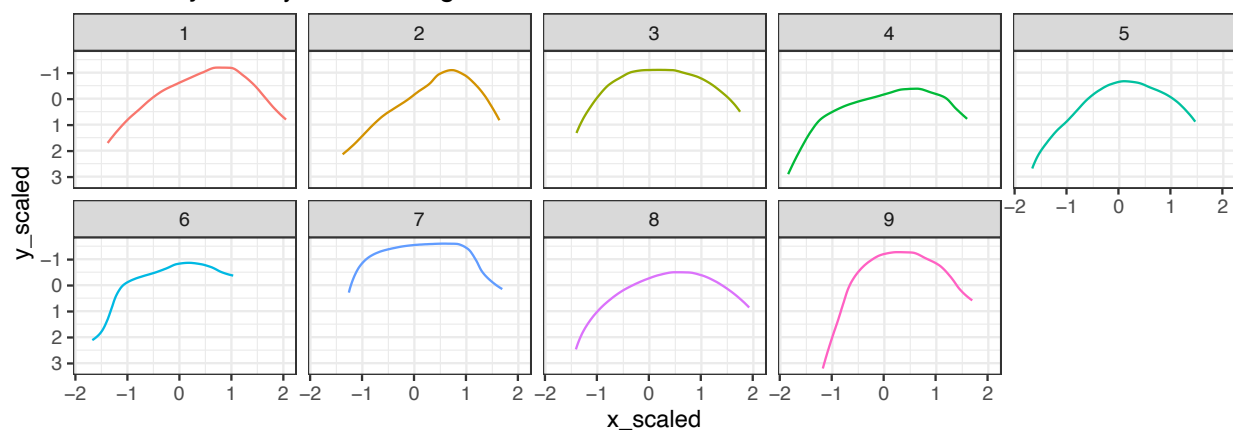

Scaled x/y – Subject 16F Target / w /

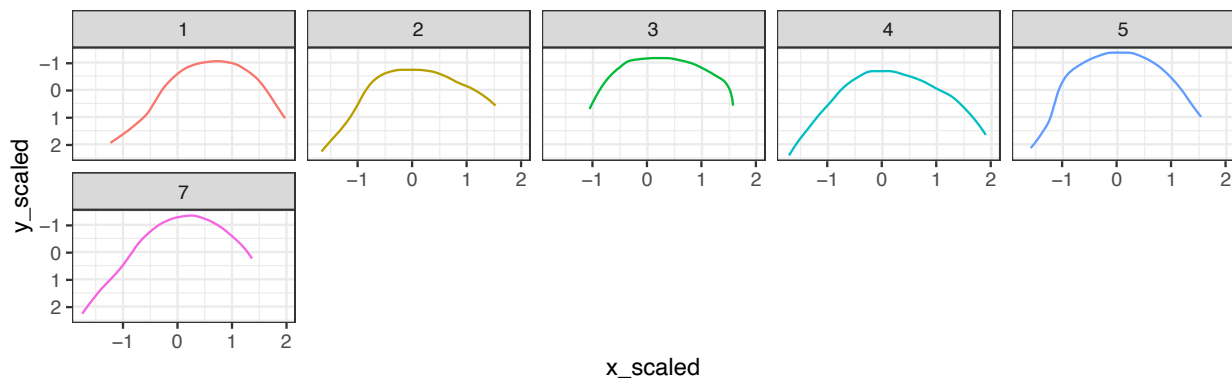

Scaled x/y – Subject 17M Target / ae /

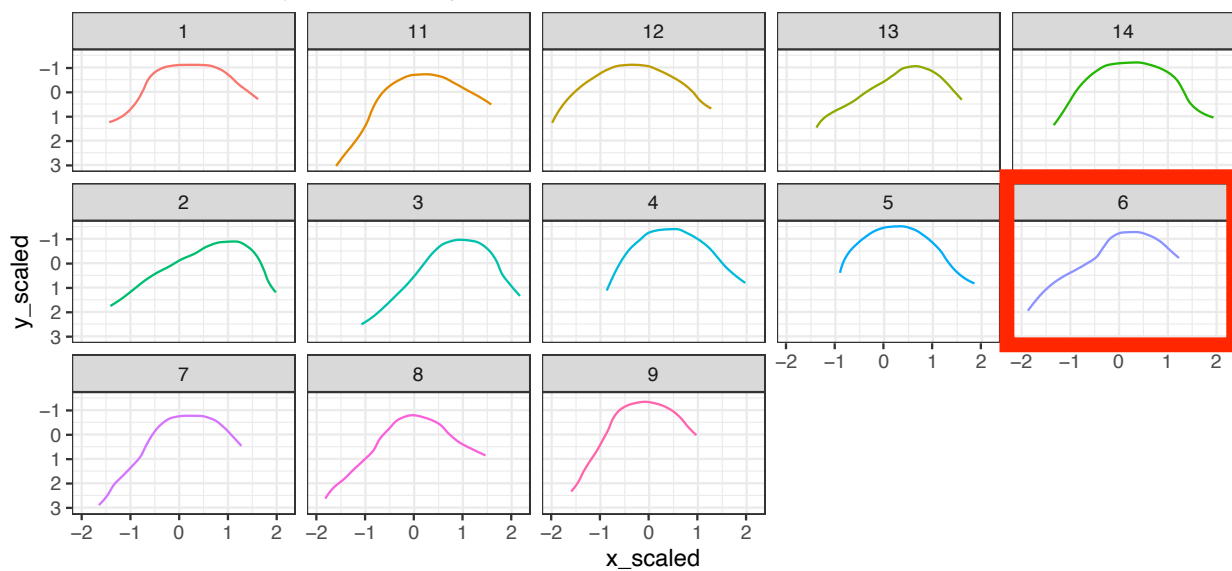



Scaled x/y – Subject 17M Target / j /

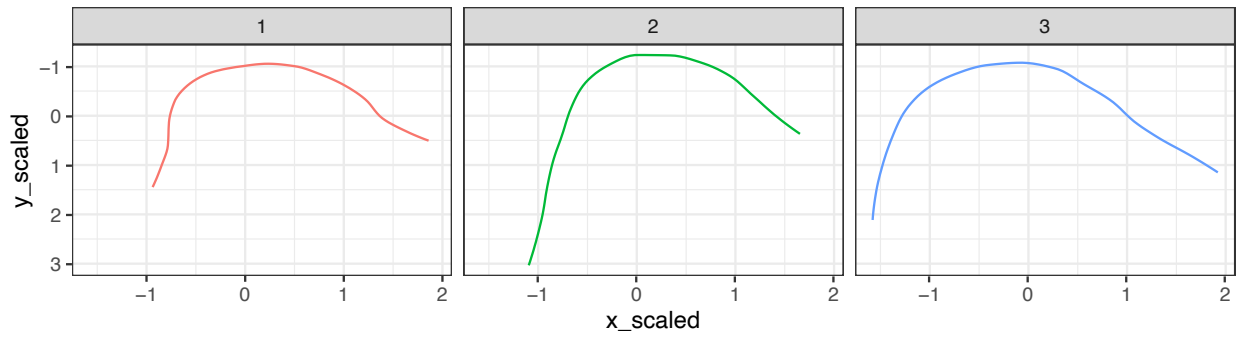

Scaled x/y – Subject 17M Target / k /

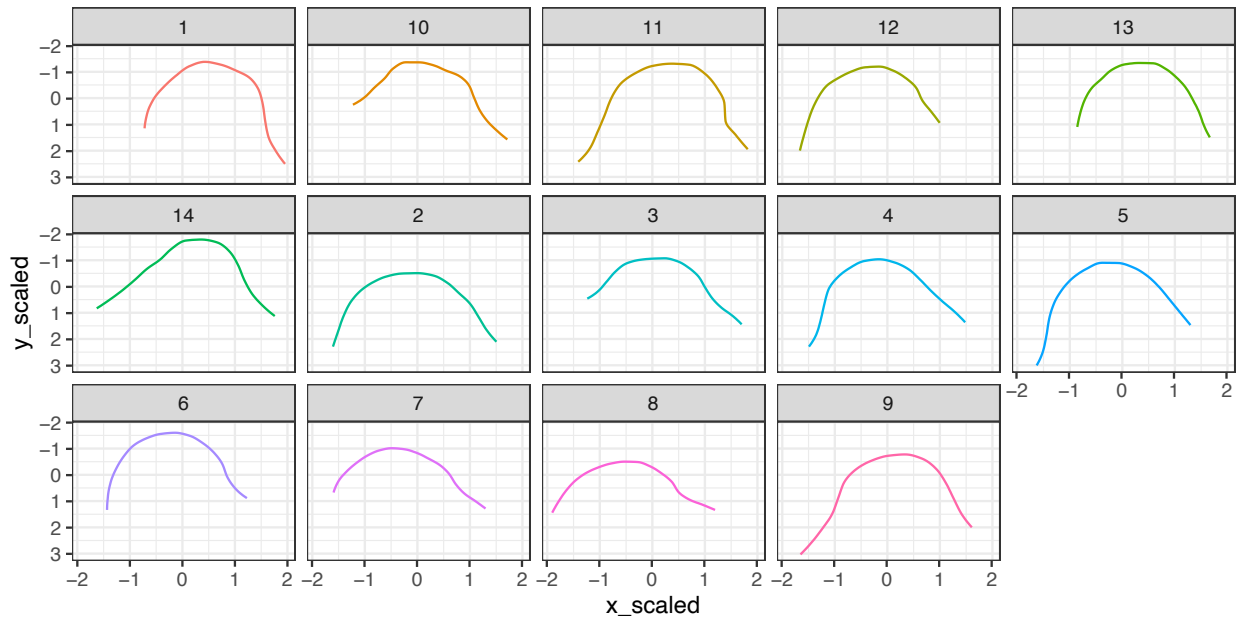

Scaled x/y – Subject 17M Target / l /

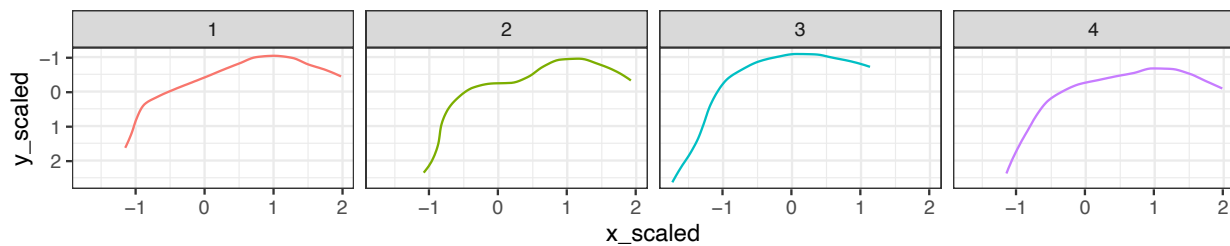

Scaled x/y – Subject 17M Target / r /

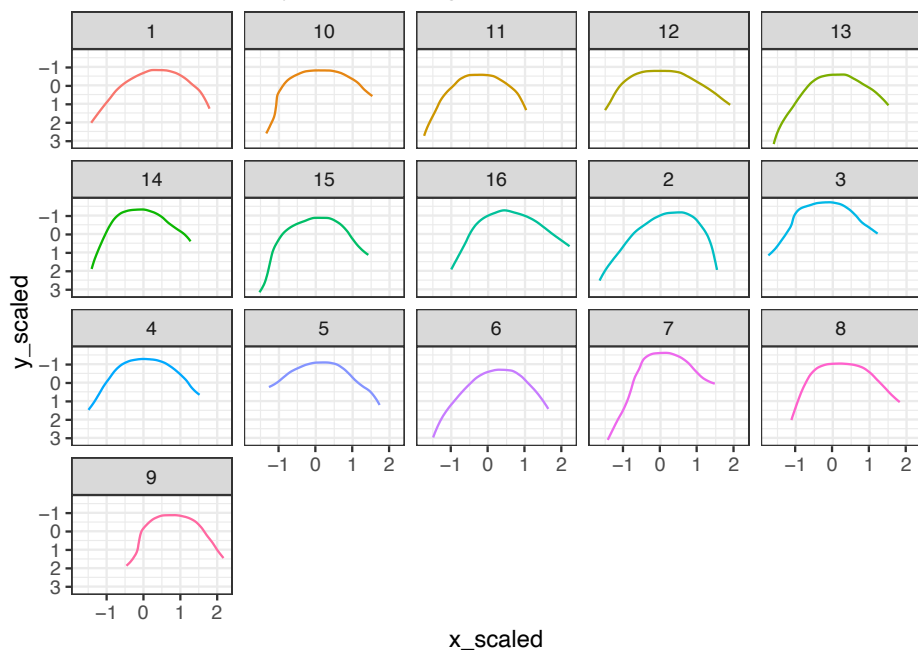

Scaled x/y – Subject 17M Target / t /

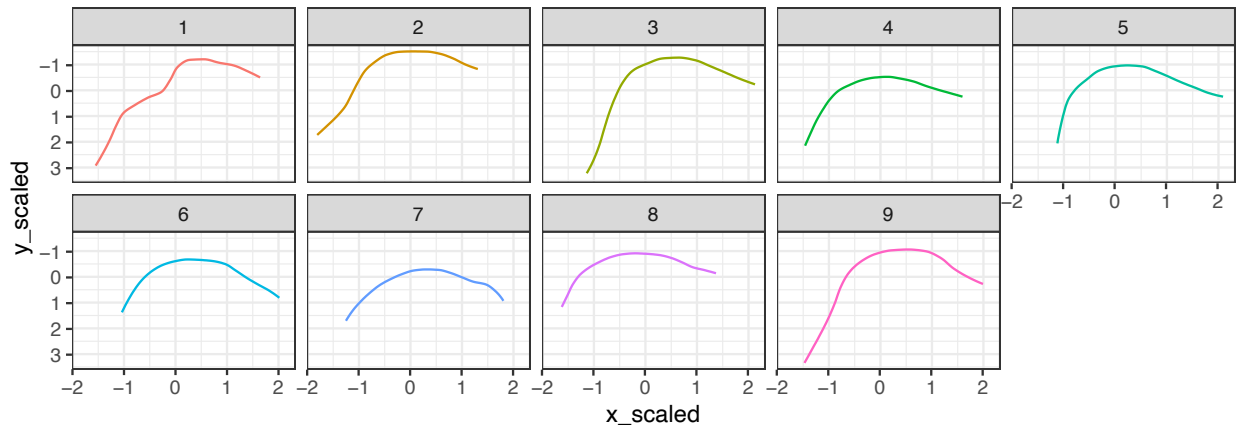

Scaled x/y – Subject 17M Target / w /

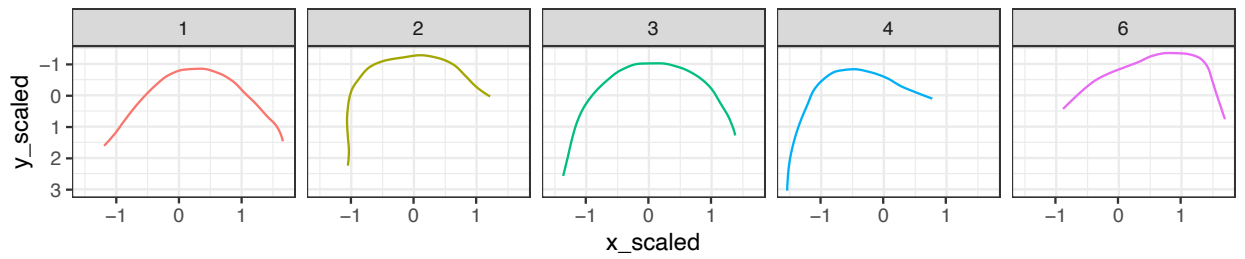

Scaled x/y – Subject 18M Target / ae /

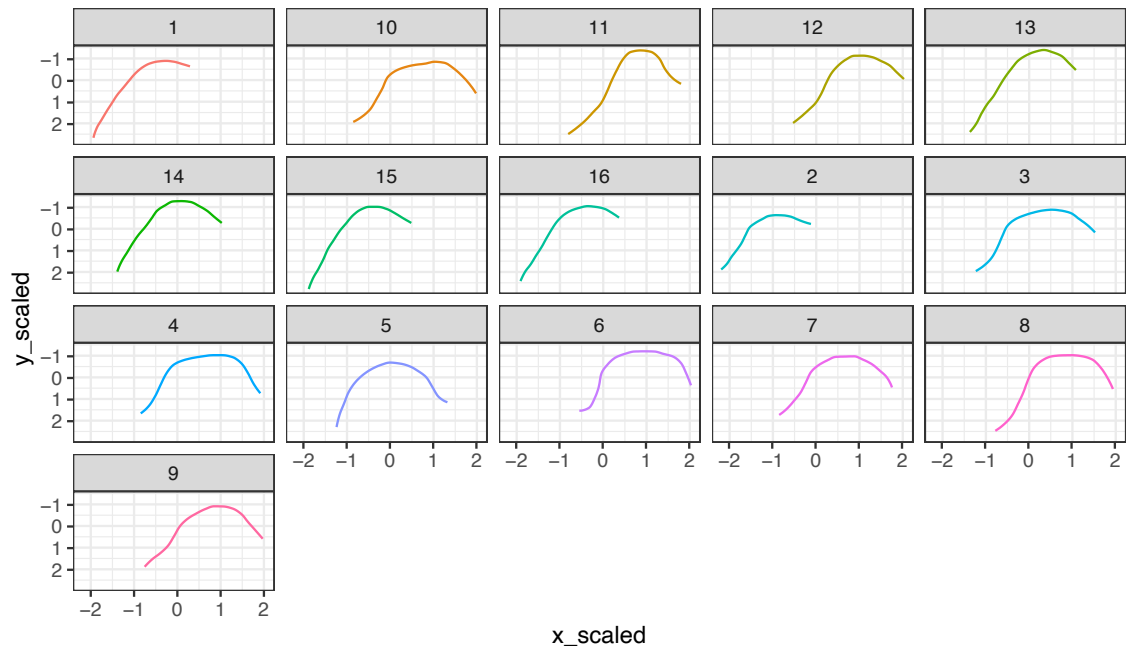

Scaled x/y – Subject 18M Target / j /

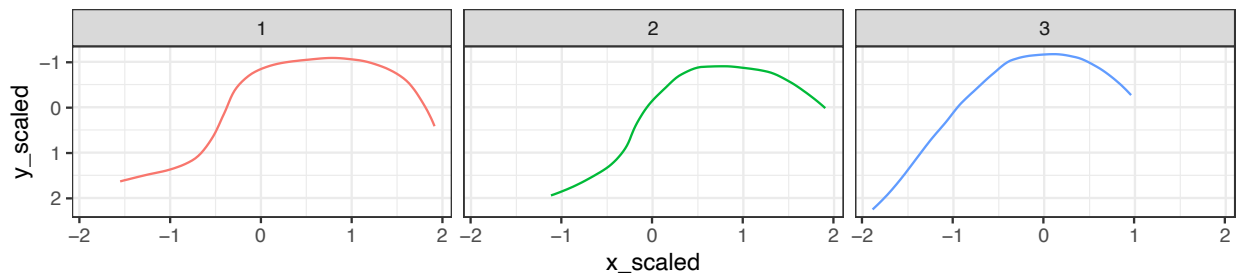

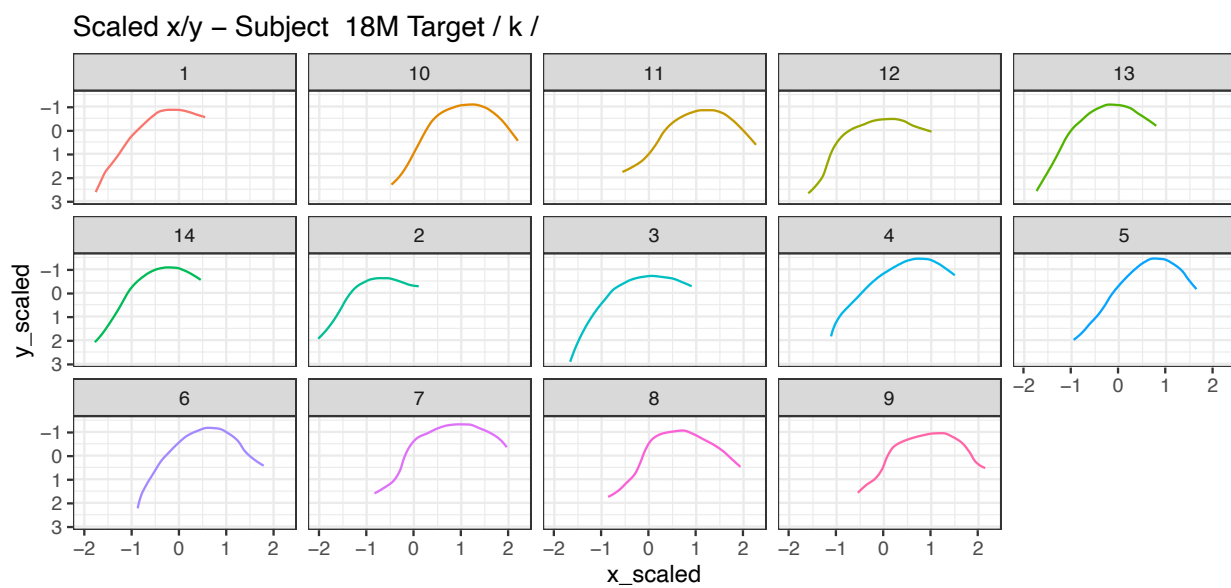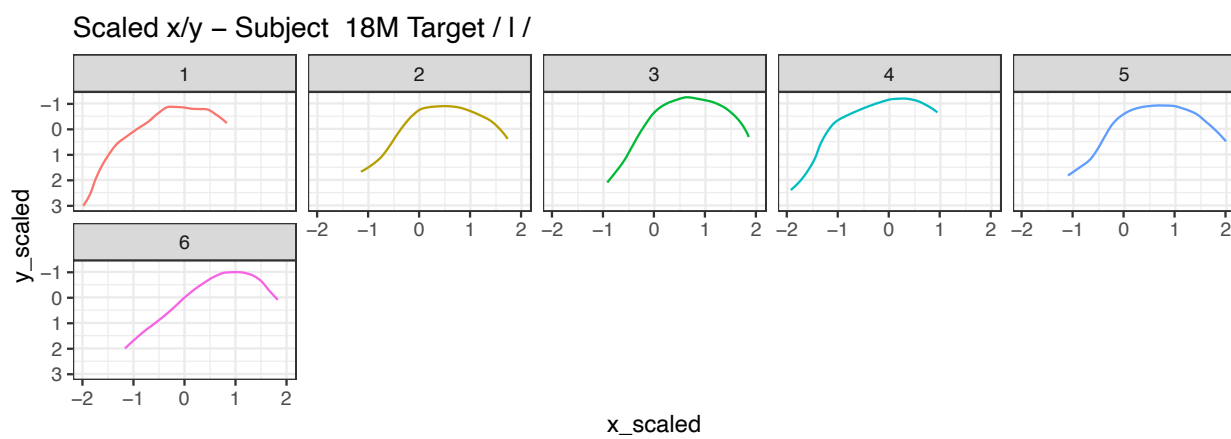

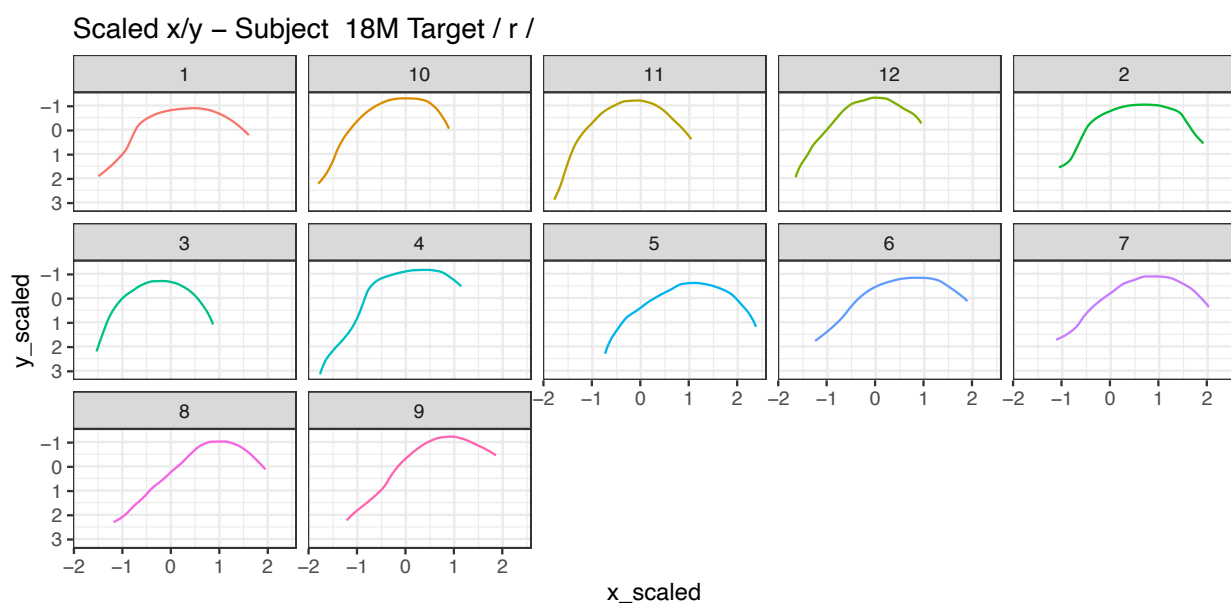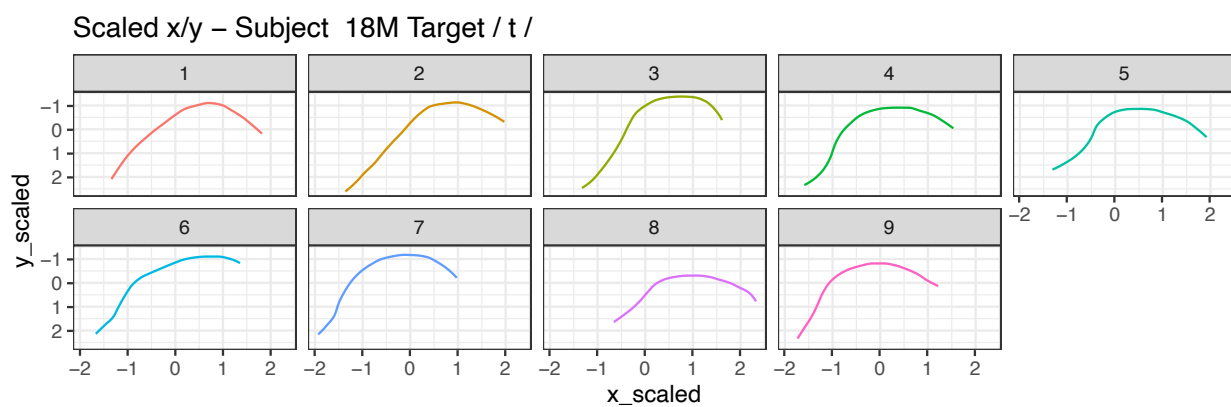

Scaled x/y – Subject 18M Target / w /

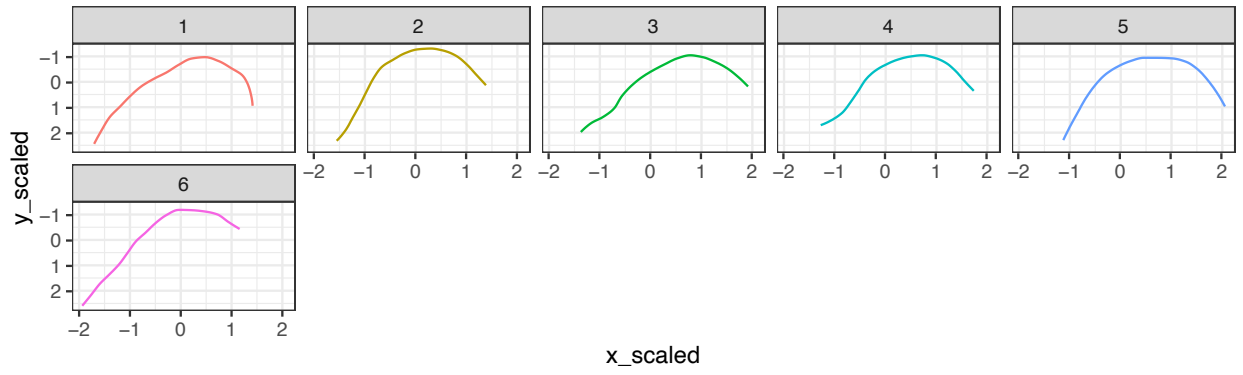

Scaled x/y – Subject 19F Target / ae /

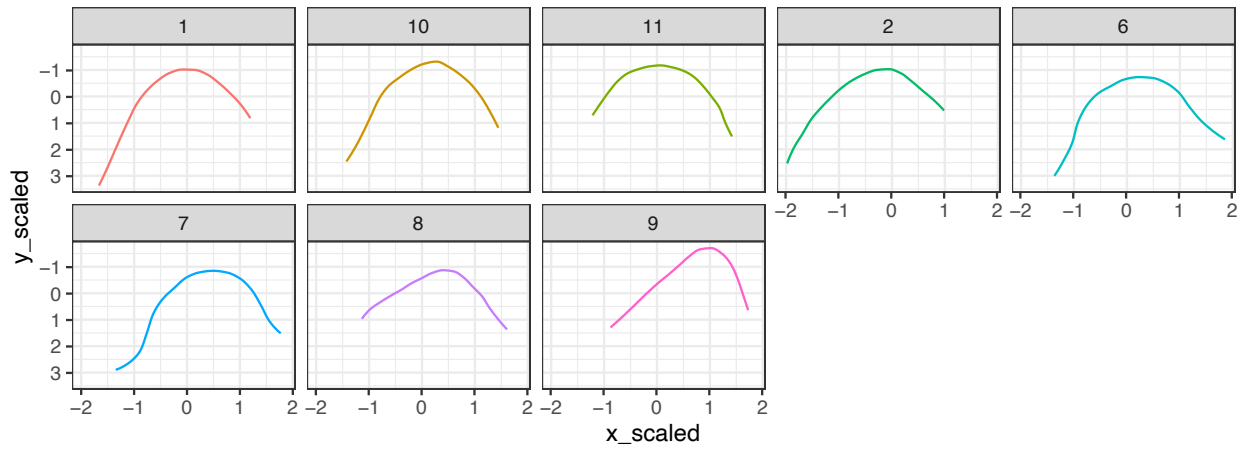

Scaled x/y – Subject 19F Target / j /

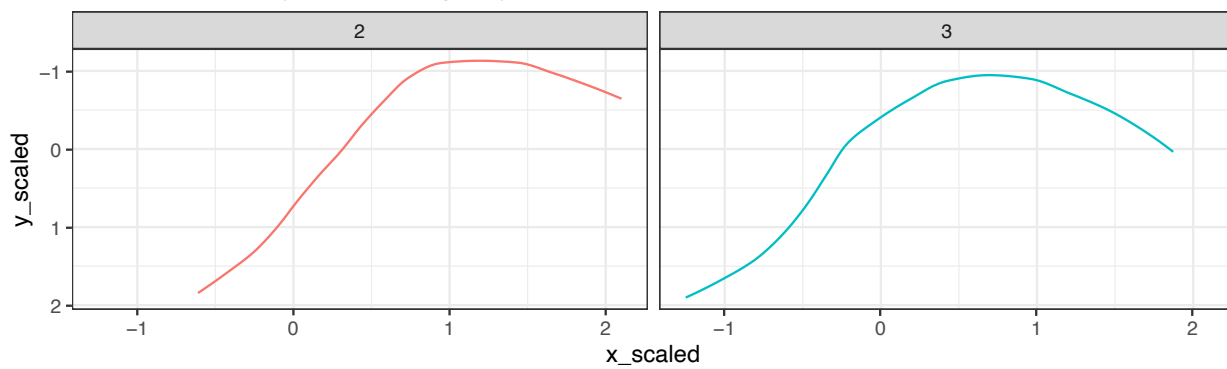

Scaled x/y – Subject 19F Target / k /

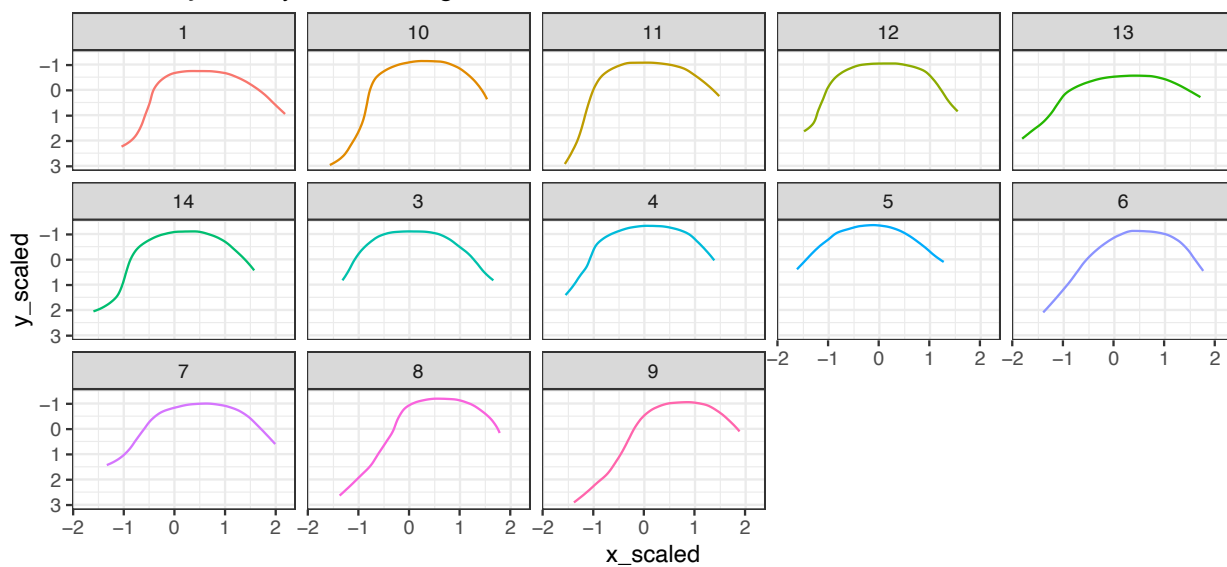



Scaled x/y – Subject 19F Target / l /

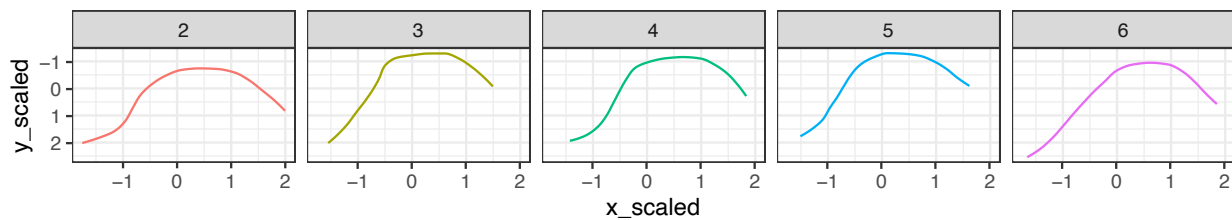

Scaled x/y – Subject 19F Target / r /

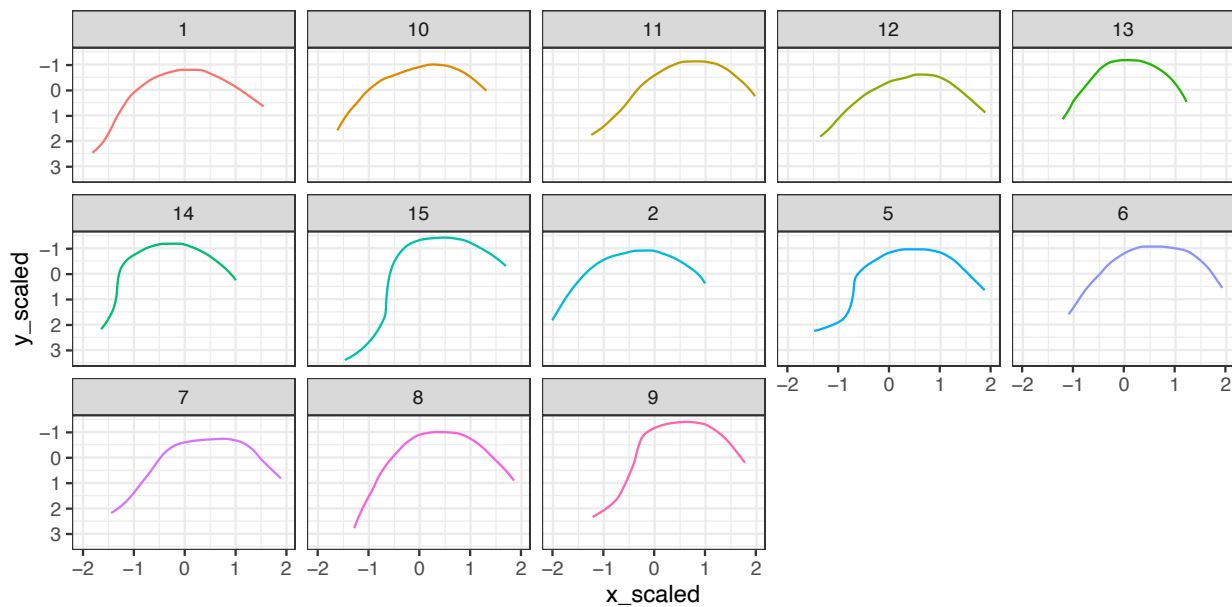

Scaled x/y – Subject 19F Target / t /

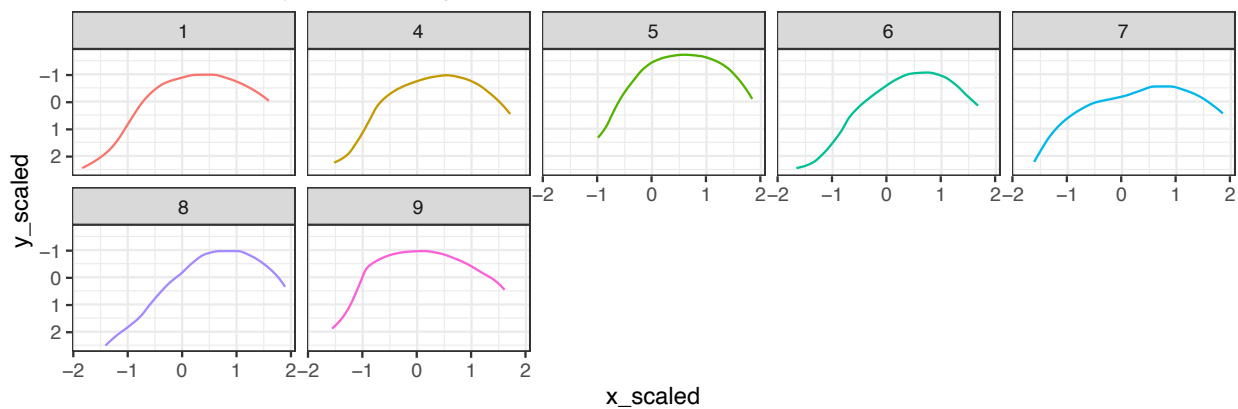

Scaled x/y – Subject 19F Target / w /

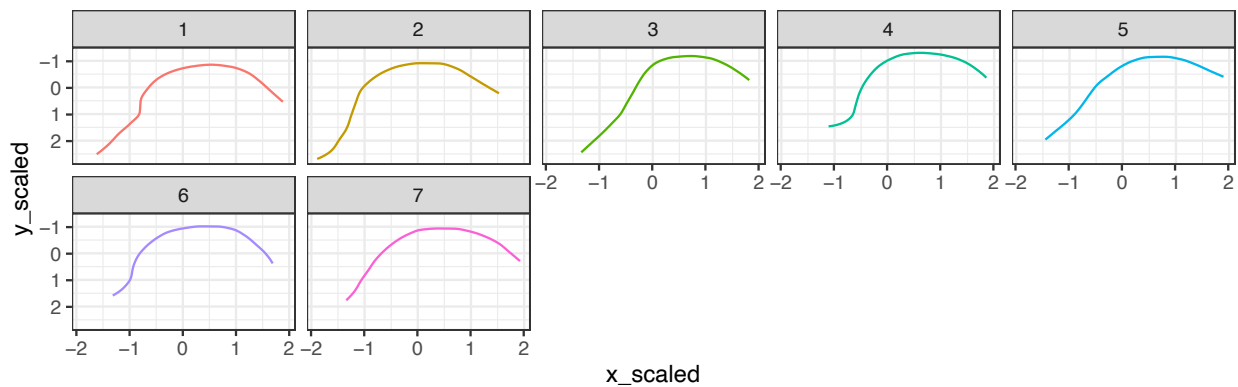

Scaled x/y – Subject 20M Target / ae /

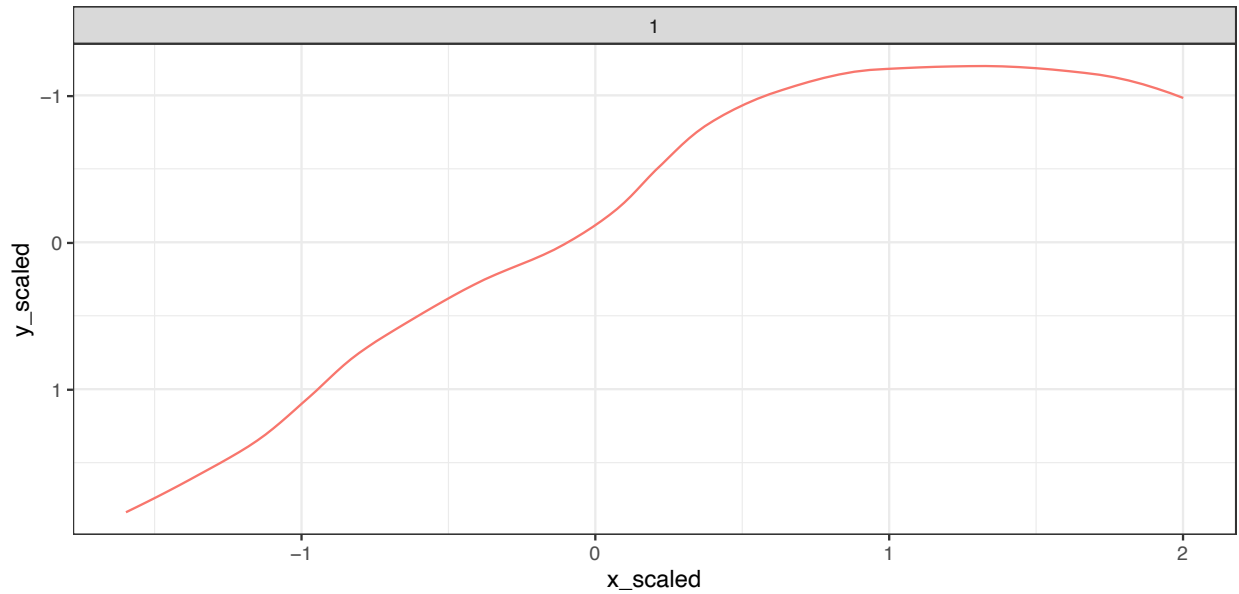

Scaled x/y – Subject 20M Target / j /

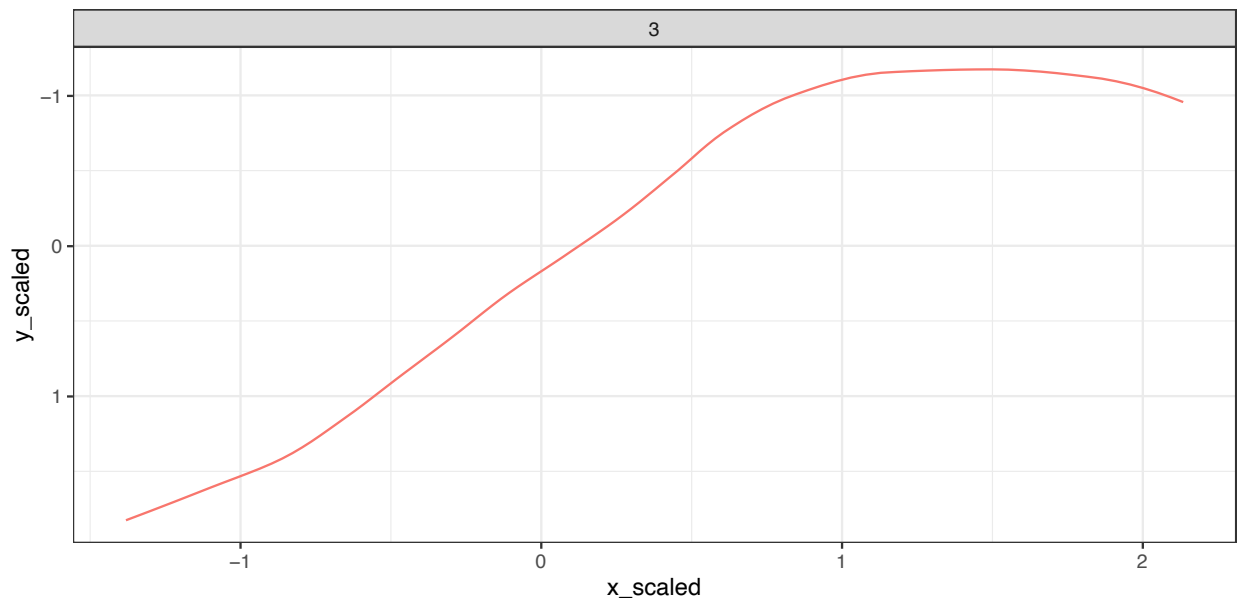

Scaled x/y – Subject 20M Target / k /

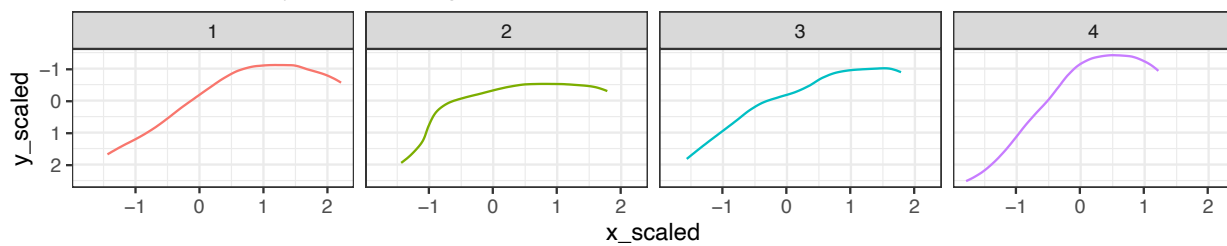

Scaled x/y – Subject 20M Target / l /

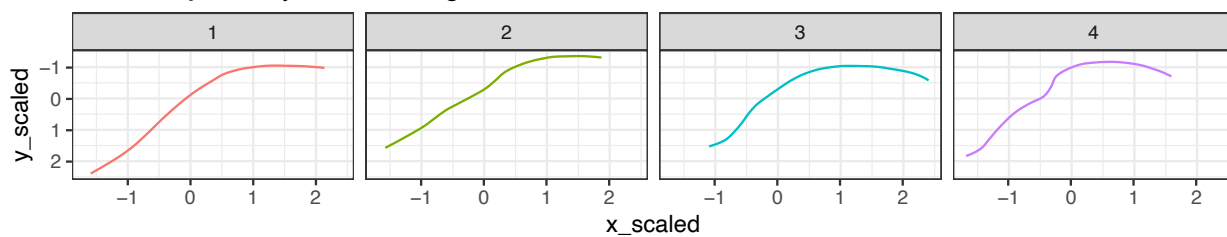

Scaled x/y – Subject 20M Target / r /

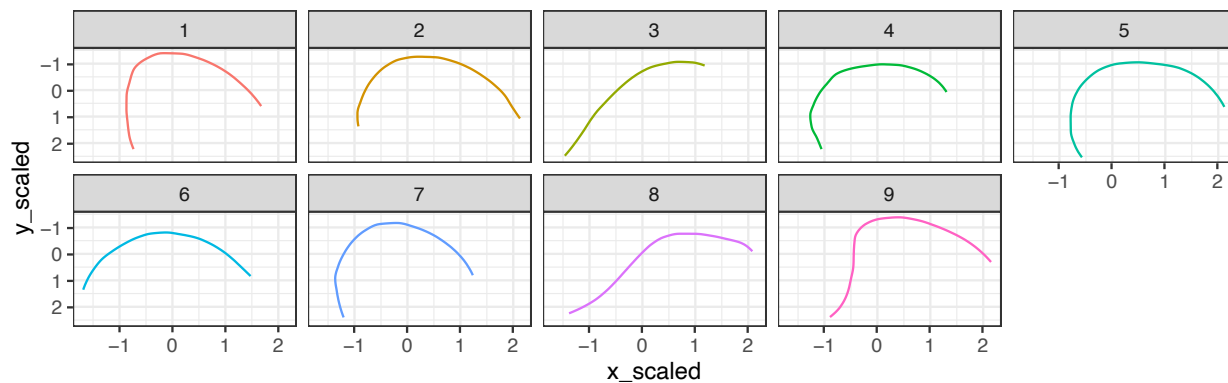

Scaled x/y – Subject 20M Target / t /

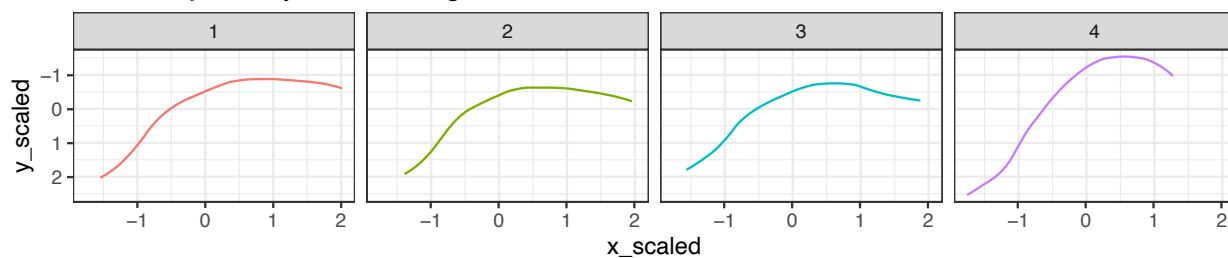

Scaled x/y – Subject 20M Target / w /

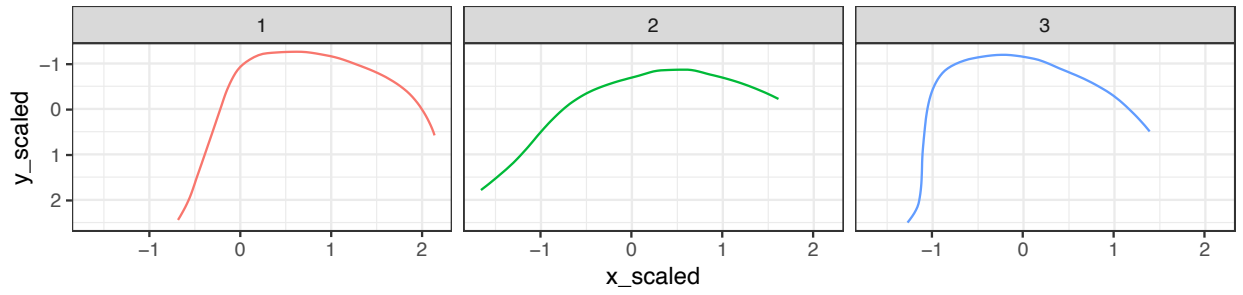

Scaled x/y – Subject 21M Target / ae /

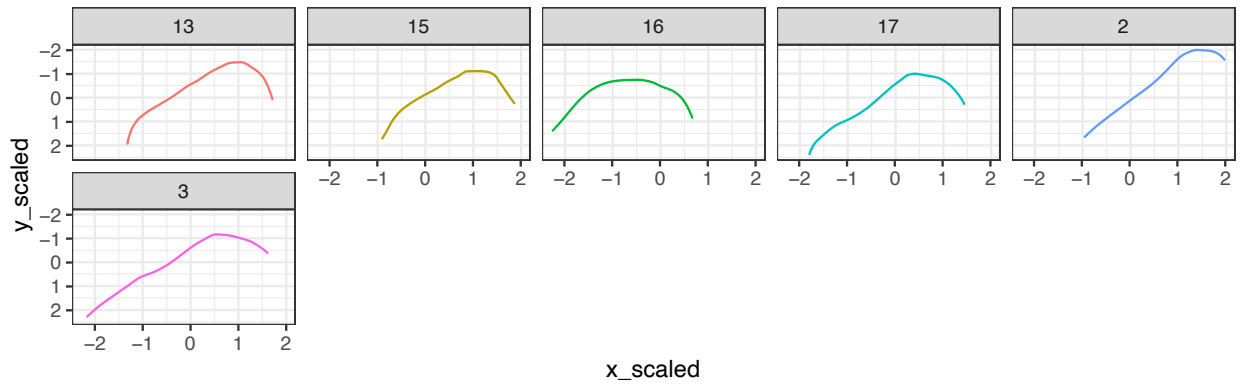

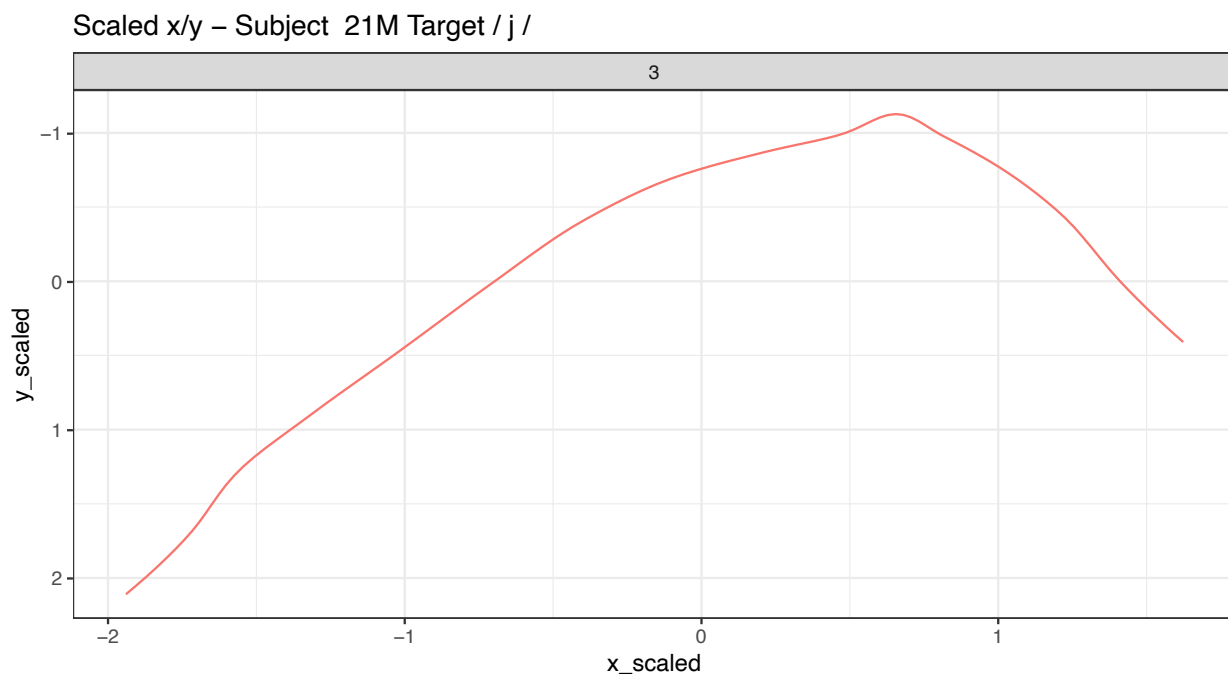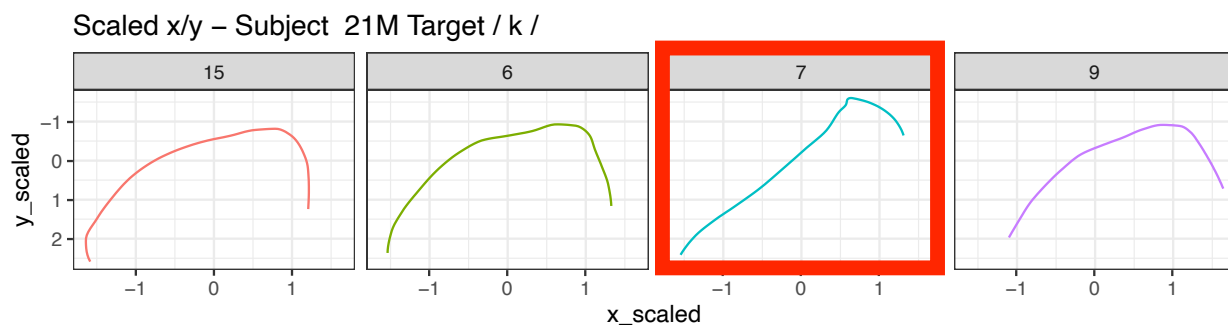

Scaled x/y – Subject 21M Target / r /

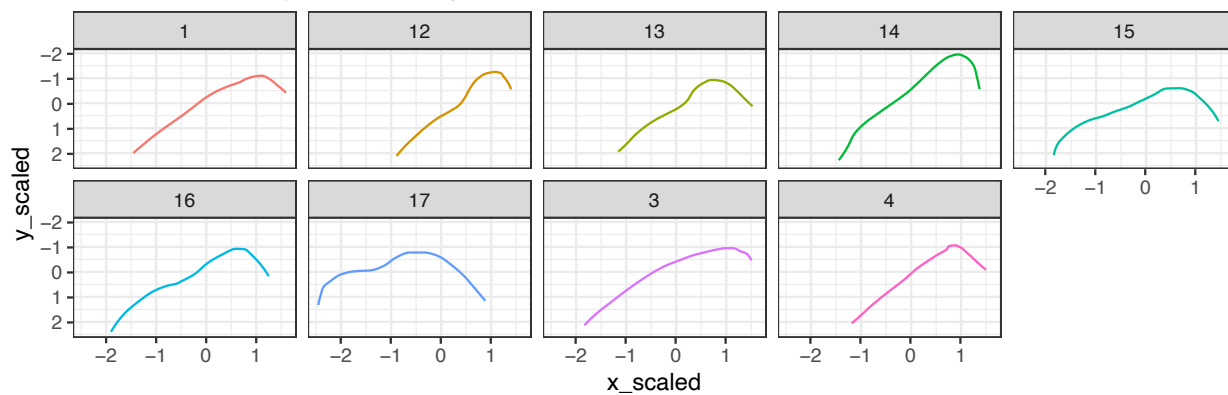

Scaled x/y – Subject 21M Target / t /

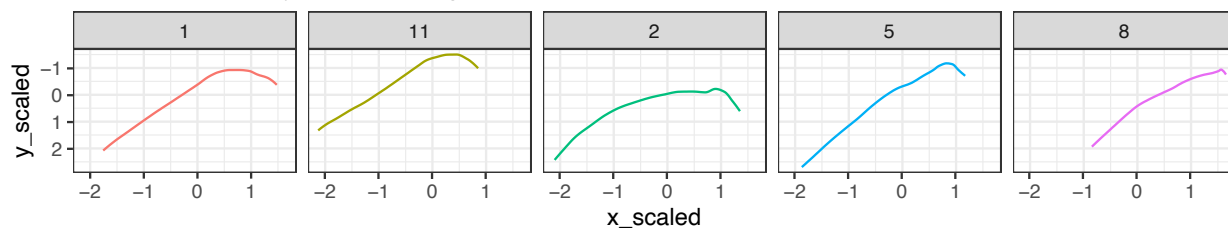



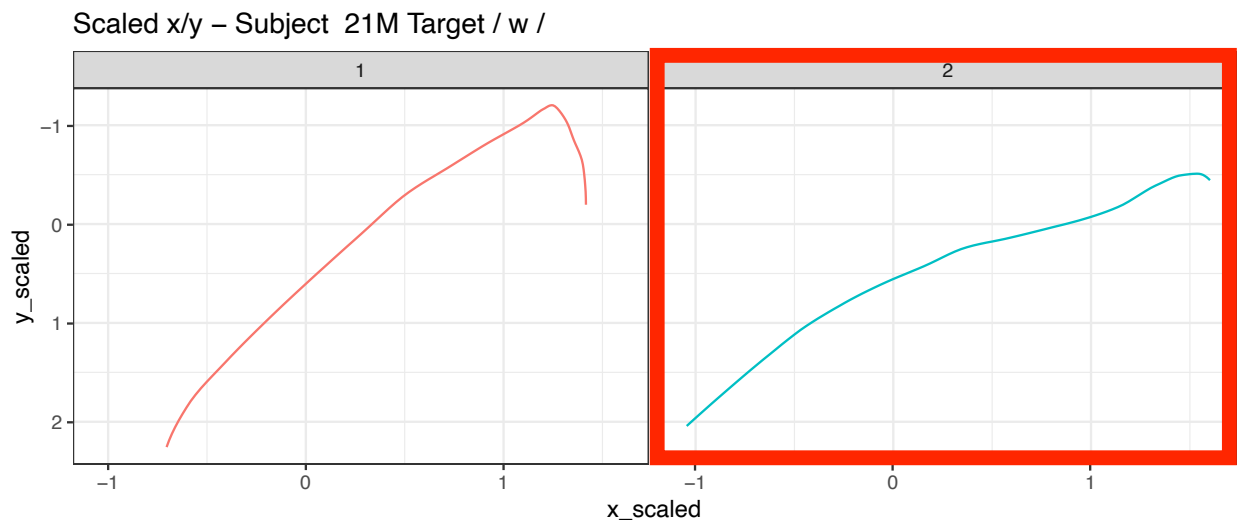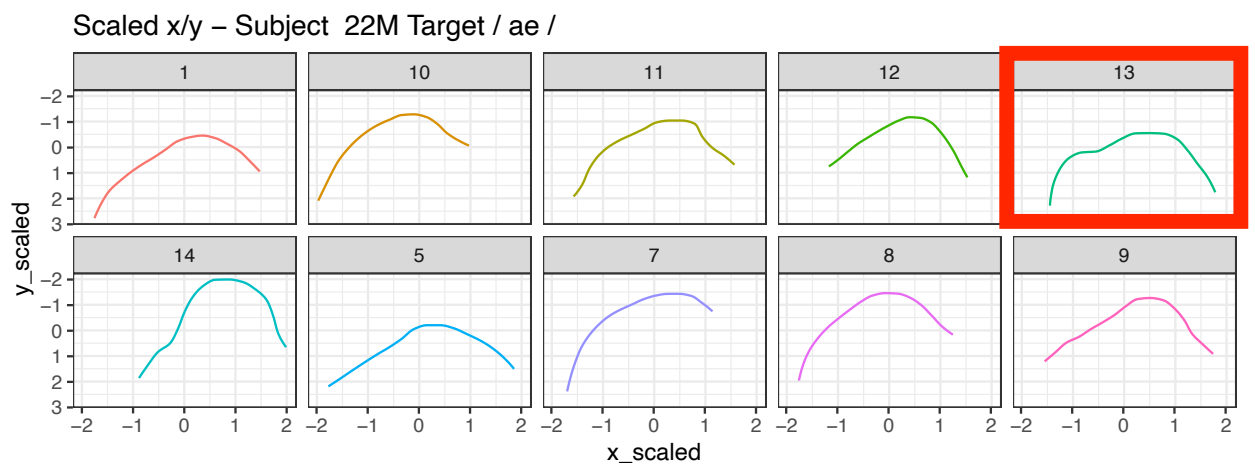

Scaled x/y – Subject 22M Target / j /

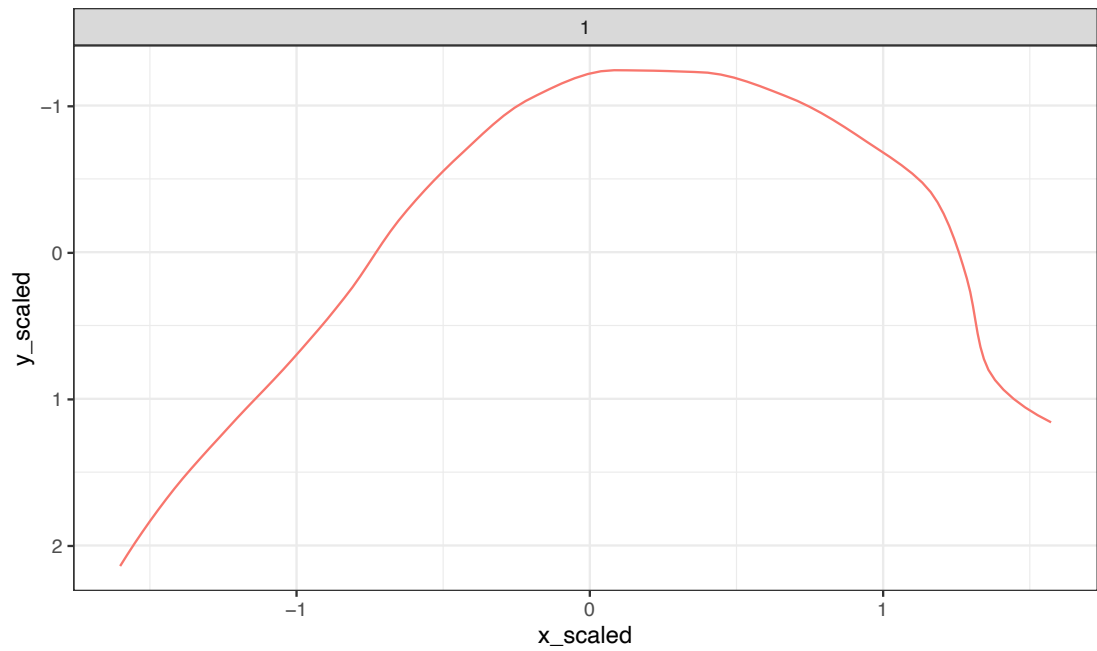

Scaled x/y – Subject 22M Target / k /

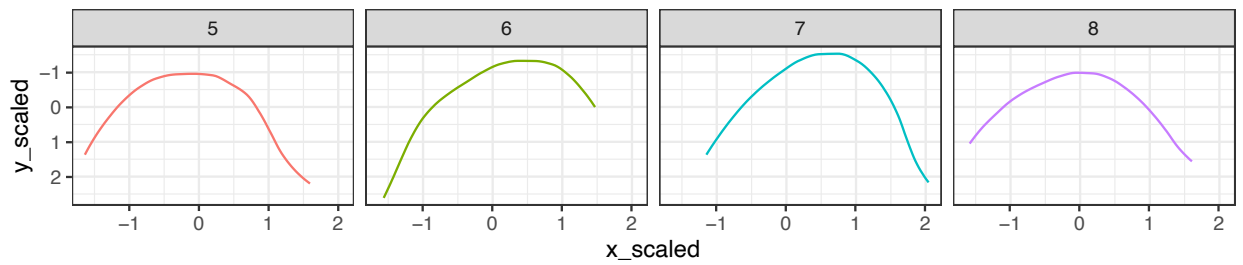

Scaled x/y – Subject 22M Target / l /

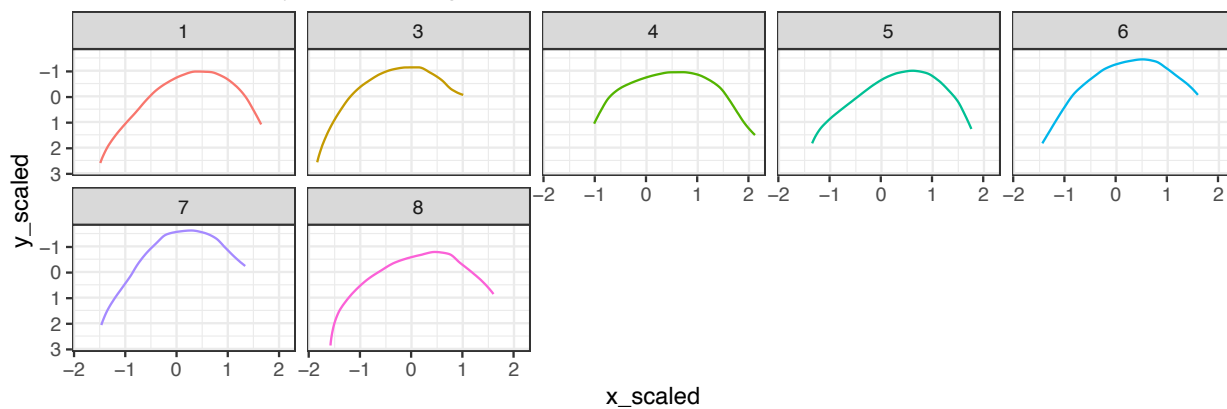

Scaled x/y – Subject 22M Target / r /

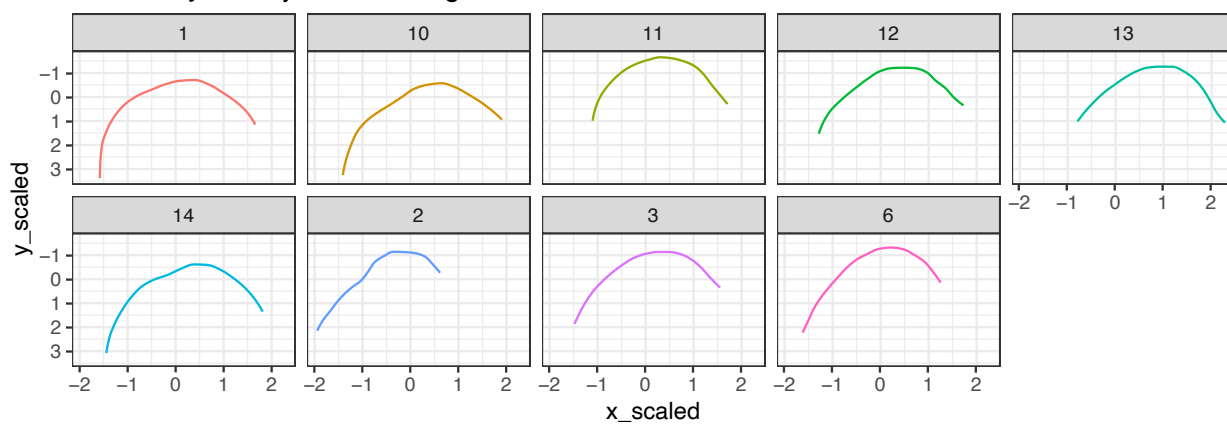

Scaled x/y – Subject 22M Target / t /

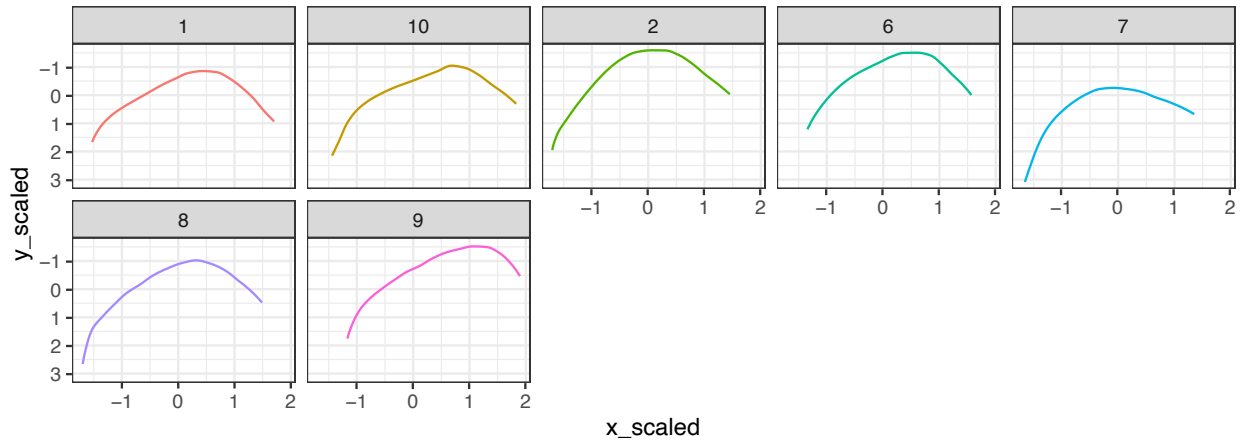

Scaled x/y – Subject 22M Target / w /

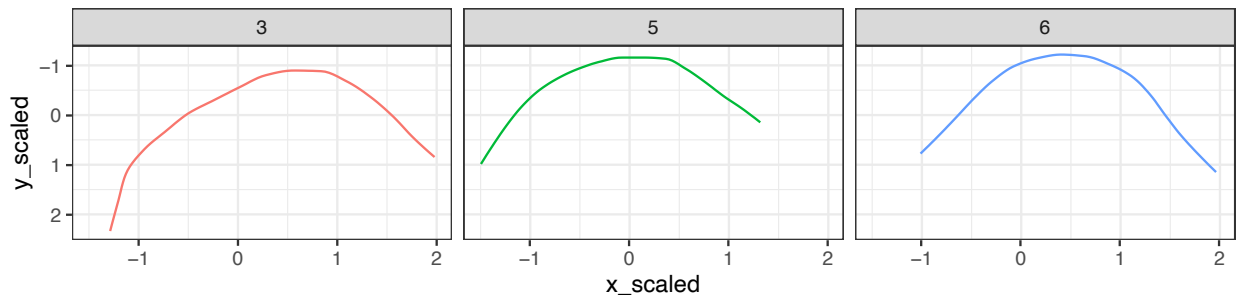

Scaled x/y – Subject 23M Target / ae /

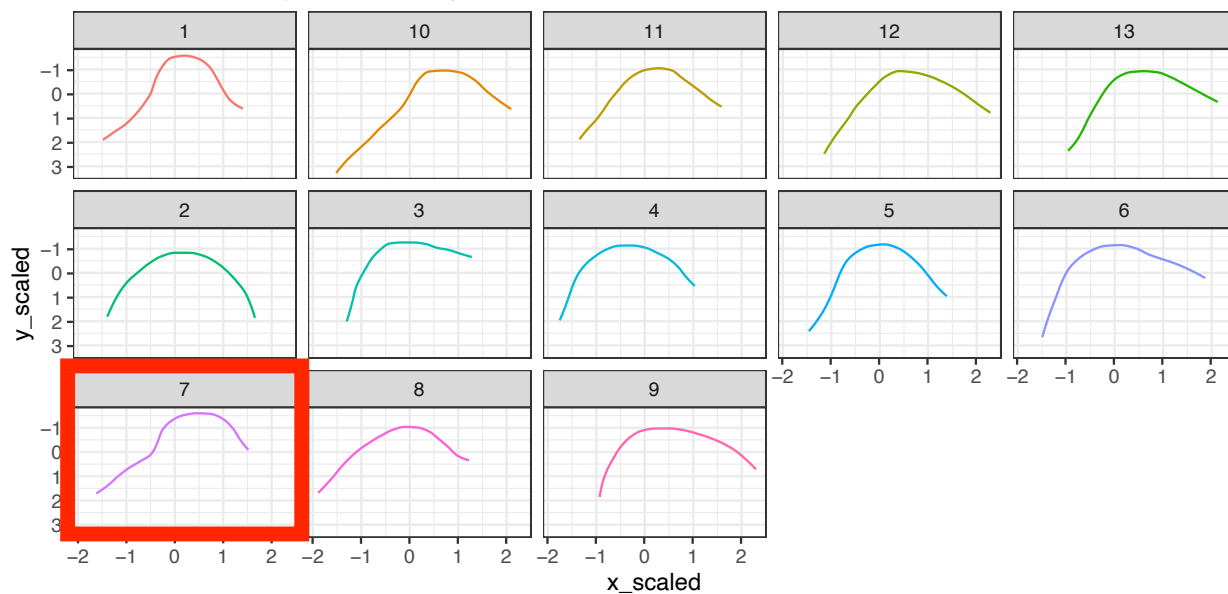

Scaled x/y – Subject 23M Target / j /

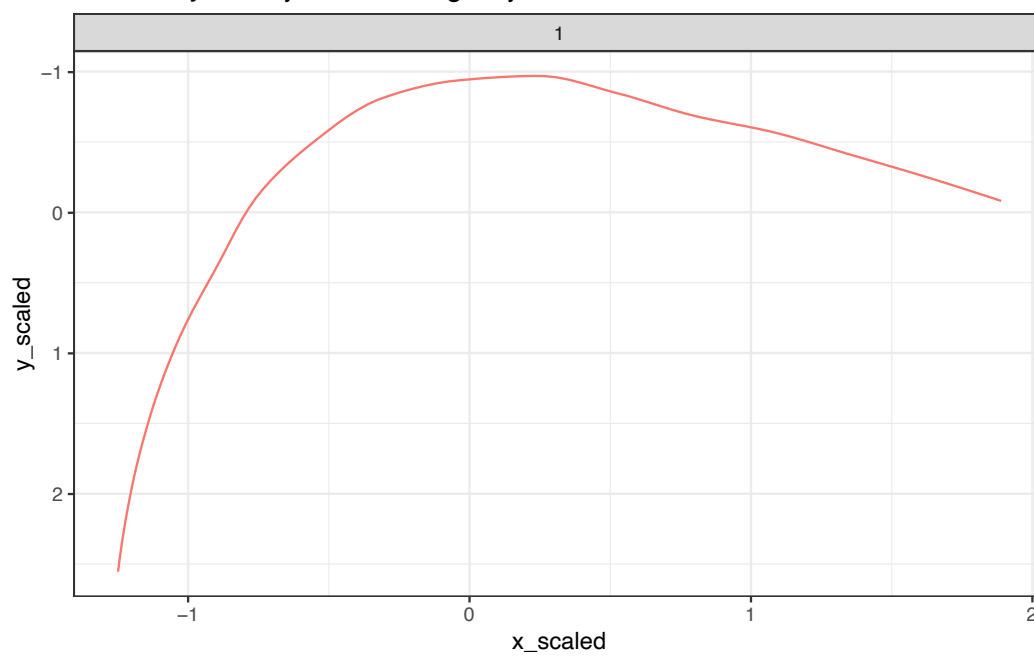

Scaled x/y – Subject 23M Target / k /

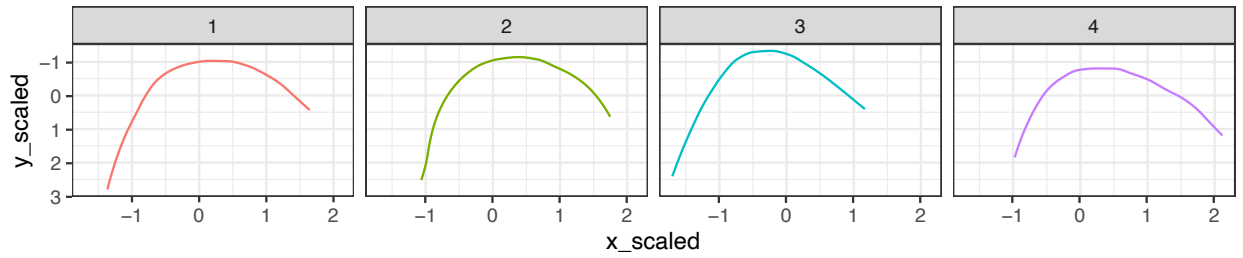

Scaled x/y – Subject 23M Target / l /

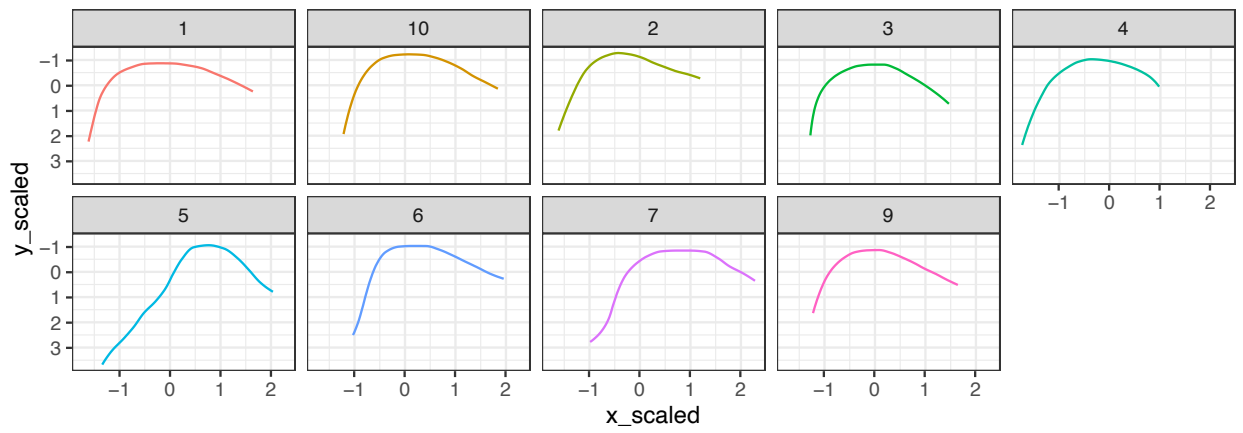

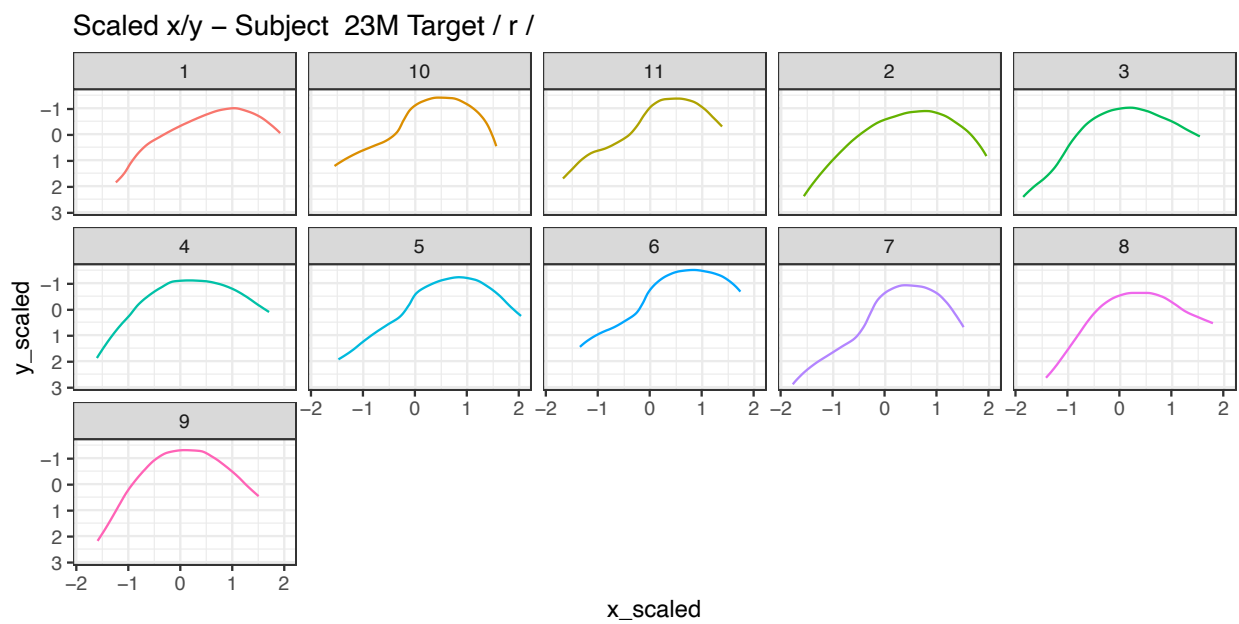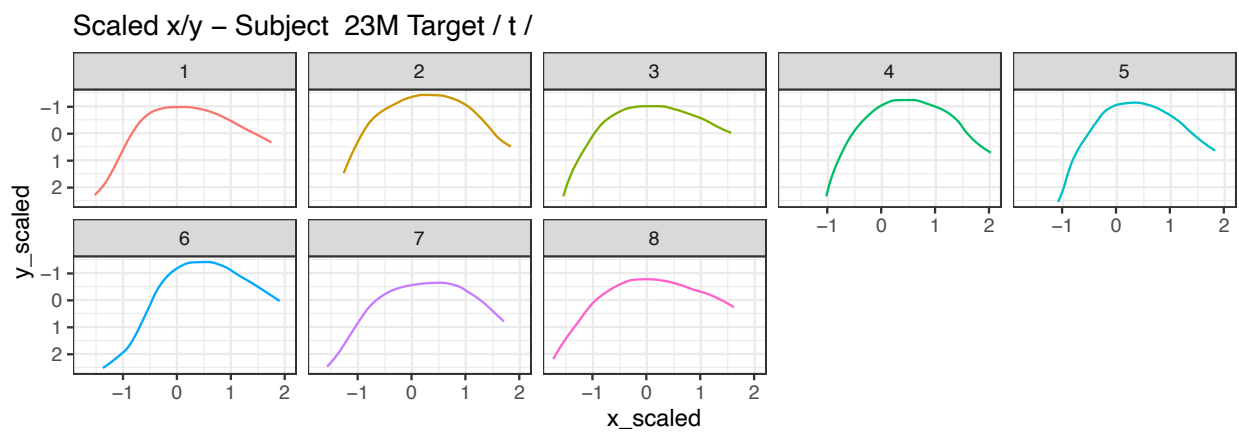

Scaled x/y – Subject 23M Target / w /

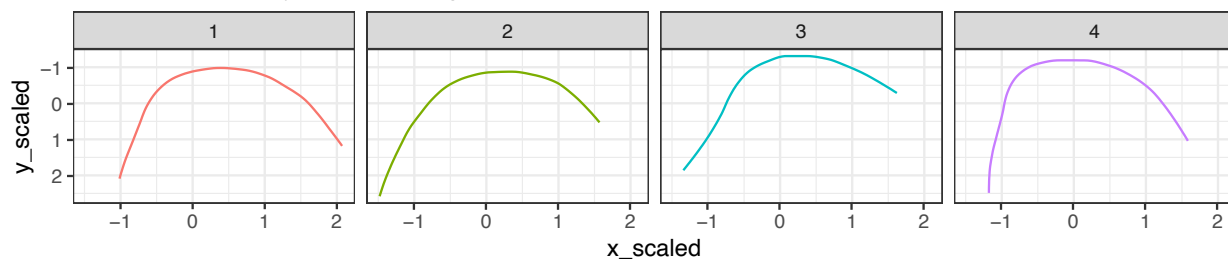

Scaled x/y – Subject 24M Target / ae /

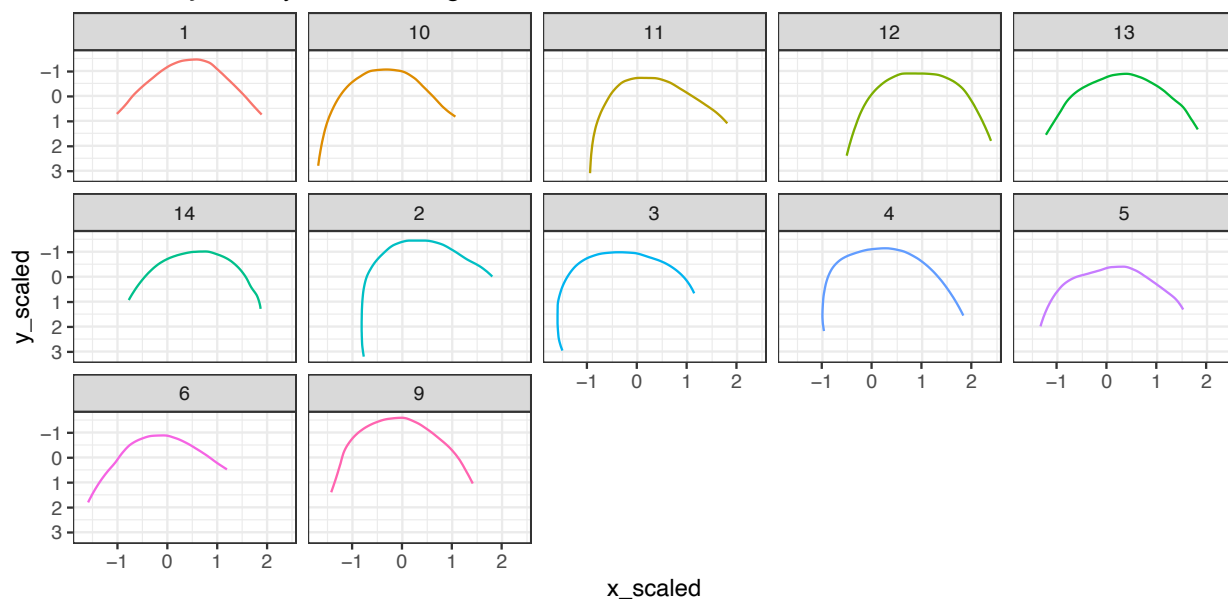



Scaled x/y – Subject 24M Target / j /

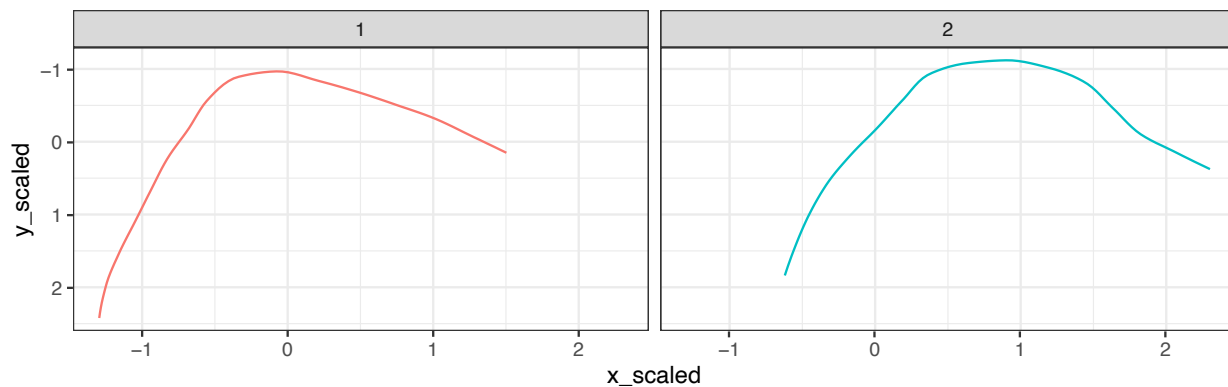

Scaled x/y – Subject 24M Target / k /

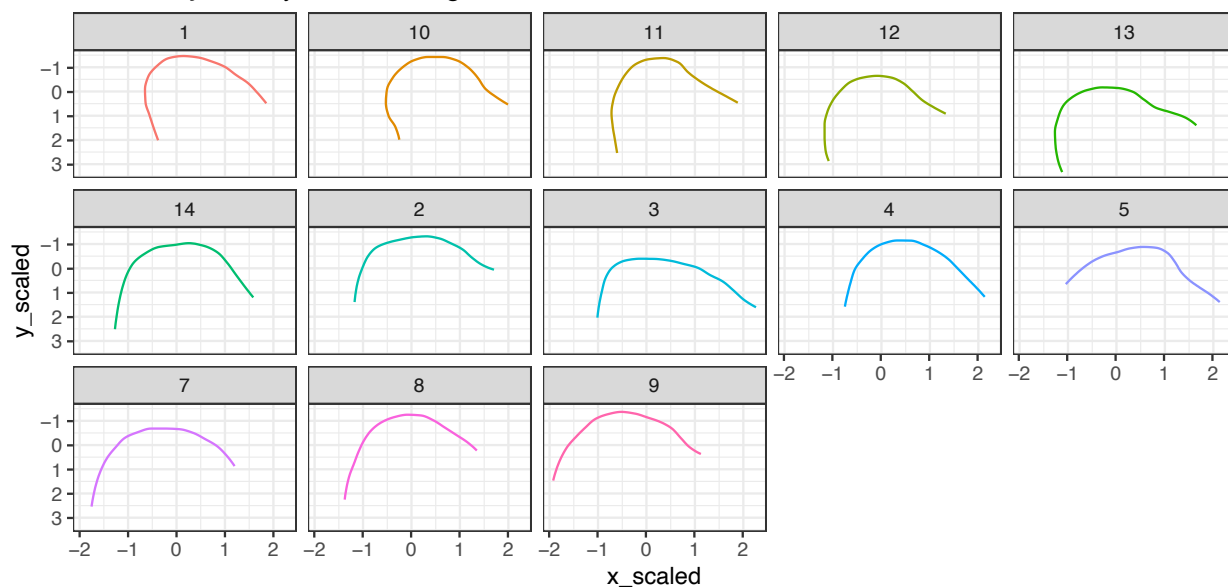

Scaled x/y – Subject 24M Target / l /

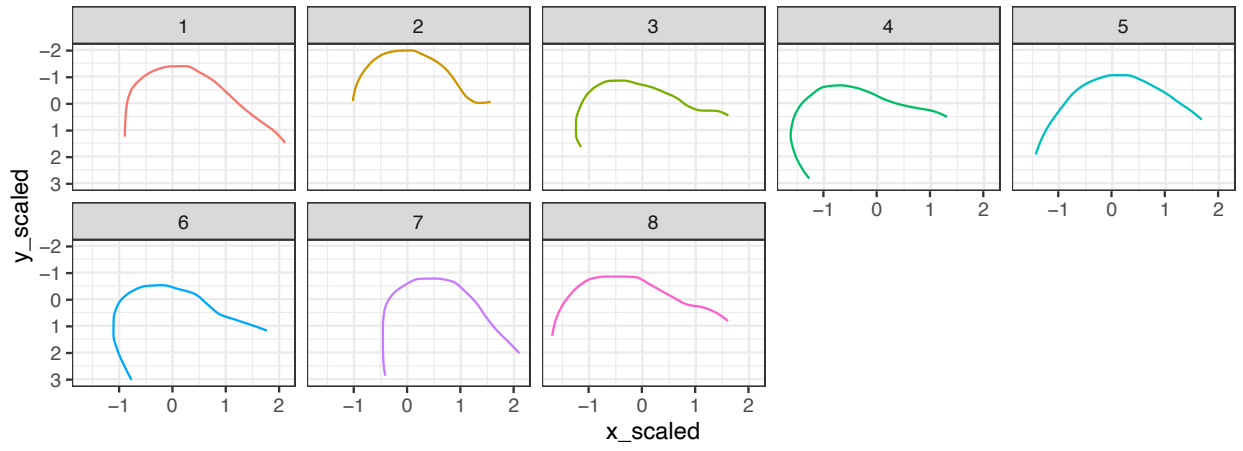

Scaled x/y – Subject 24M Target / r /

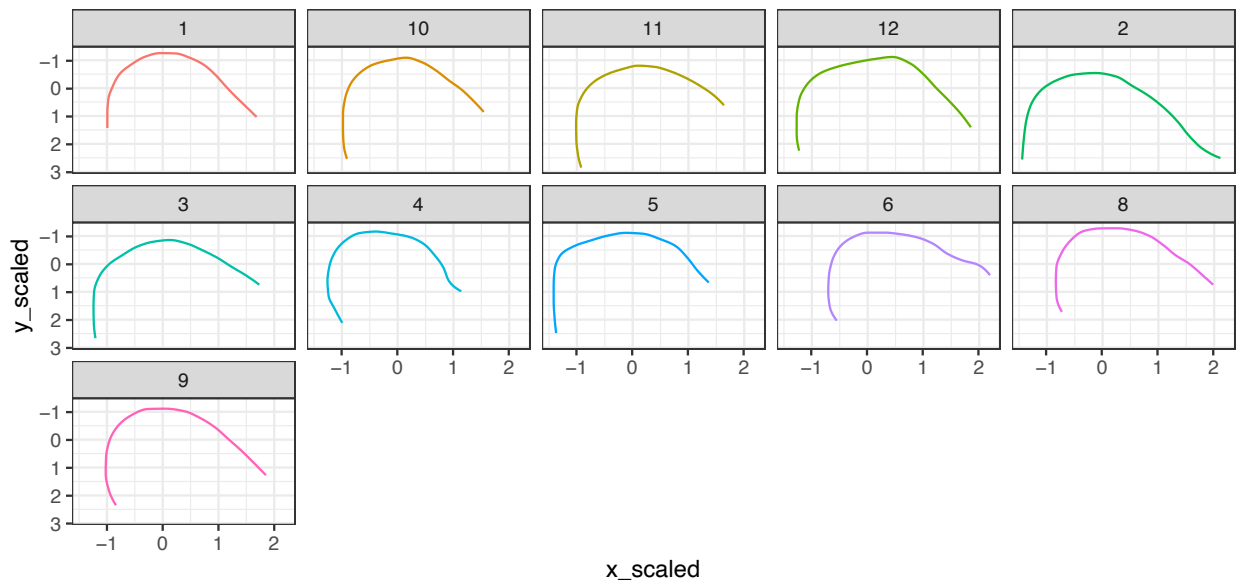

Scaled x/y – Subject 24M Target / t /

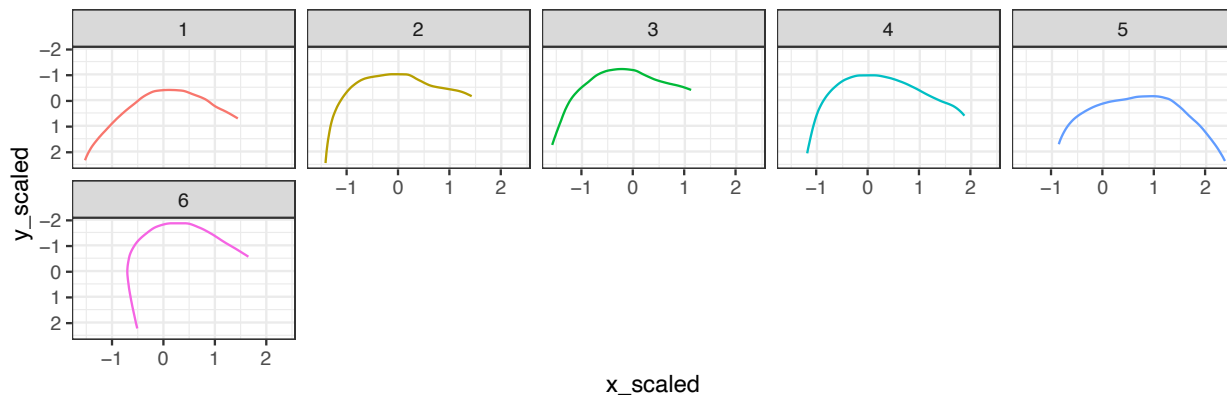

Scaled x/y – Subject 24M Target / w /

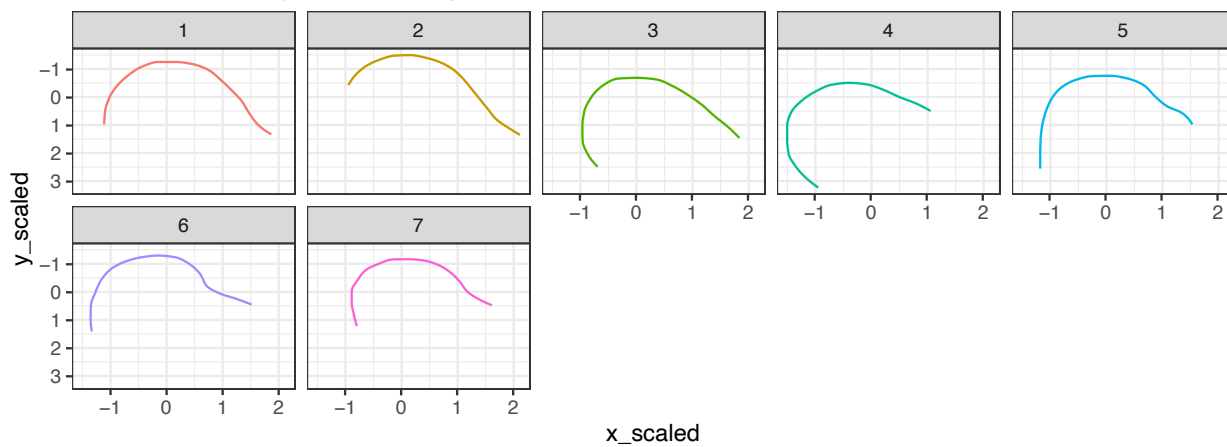

Supplement: Supplementary file 1 [file 1]
