# Supplementary material
Source: publisher figshare collection journal article supplement (https://asha.figshare.com/articles/dataset/_/14880039)
Supplement: Supplementary file 2 [file 1]

**Supplemental Material S1. Complete participant evaluation scores.**

| classification | site     | subject | sex | age  | CELF-P4 receptive tasks | PPVT-4 | SRT PCC (%) | SRT Additions | SAILS (%) | HAPP-3 | HAPP-3 identified candidate patterns                                                                                    |
|----------------|----------|---------|-----|------|-------------------------|--------|-------------|---------------|-----------|--------|-------------------------------------------------------------------------------------------------------------------------|
| TD             | Haskins  | 01F     | F   | 5;6  | 103                     | x      | x           | x             | 86.7      | 97     | <i>did not analyze candidate patterns for eligibility</i>                                                               |
| TD             | Haskins  | 02F     | F   | 5;11 | 100                     | x      | x           | x             | 71.7      | 95     | <i>did not analyze candidate patterns for eligibility</i>                                                               |
| TD             | Haskins  | 03M     | M   | 5;6  | 111                     | x      | x           | x             | 71.7      | 85     | <i>did not analyze candidate patterns for eligibility</i>                                                               |
| TD             | Haskins  | 04F     | F   | 5;6  | 113                     | x      | x           | x             | 86.7      | 97     | <i>did not analyze candidate patterns for eligibility</i>                                                               |
| TD             | Haskins  | 05M     | M   | 4;2  | 121                     | x      | x           | x             | 68.3      | 90     | <i>did not analyze candidate patterns for eligibility</i>                                                               |
| TD             | Haskins  | 06M     | M   | 4;11 | 142                     | x      | x           | x             | 81.7      | 87     | <i>did not analyze candidate patterns for eligibility</i>                                                               |
| TD             | Haskins  | 07F     | F   | 5;11 | 111                     | x      | x           | x             | 83.3      | 88     | <i>did not analyze candidate patterns for eligibility</i>                                                               |
| TD             | Haskins  | 08F     | F   | 5;9  | 95                      | x      | x           | x             | 75.0      | 88     | <i>did not analyze candidate patterns for eligibility</i>                                                               |
| TD             | Molloy   | 09F     | F   | 4;3  | 103                     | x      | x           | x             | 74.6      | 112    | <i>did not analyze candidate patterns for eligibility</i>                                                               |
| TD             | Molloy   | 10F     | F   | 6;0  | 117                     | x      | x           | x             | 76.7      | 85     | <i>did not analyze candidate patterns for eligibility</i>                                                               |
| TD             | Molloy   | 11F     | F   | 4;9  | 100                     | x      | x           | x             | 53.3      | 81     | <i>did not analyze candidate patterns for eligibility</i>                                                               |
| TD             | Molloy   | 12M     | M   | 6;3  | 105                     | x      | x           | x             | 90.0      | 100    | <i>did not analyze candidate patterns for eligibility</i>                                                               |
| TD             | Molloy   | 13F     | F   | 4;3  | 112                     | x      | x           | x             | 70.0      | 103    | <i>did not analyze candidate patterns for eligibility</i>                                                               |
| TD             | Molloy   | 14F     | F   | 4;5  | 125                     | x      | x           | x             | 85.0      | 100    | <i>did not analyze candidate patterns for eligibility</i>                                                               |
| TD             | Syracuse | 15M     | M   | 5;3  | 118                     | x      | x           | x             | 78.3      | 100    | <i>did not analyze candidate patterns for eligibility</i>                                                               |
| TD             | Syracuse | 16F     | F   | 5;5  | 115                     | x      | x           | x             | 70        | 84     | <i>did not analyze candidate patterns for eligibility</i>                                                               |
| TD             | Syracuse | 17M     | M   | 4;6  | 103                     | x      | x           | x             | 80        | 99     | <i>did not analyze candidate patterns for eligibility</i>                                                               |
| SSD            | Haskins  | 18M     | M   | 4;2  | 127                     | 136    | 68          | 3             | 70.0      | <55    | <i>consonant clusters, prevocalic liquids; stridents</i>                                                                |
| SSD            | Haskins  | 19F     | F   | 5;0  | 93                      | 99     | 84          | 0             | 58.3      | <55    | <i>consonant clusters; prevocalic liquids; stridents</i>                                                                |
| SSD            | Haskins  | 20M     | M   | 5;4  | 98                      | 113    | 88          | x             | 75.00     | <55    | <i>consonant clusters, prevocalic liquids; velars</i>                                                                   |
| SSD            | Molloy   | 21M     | M   | 4;0  | 90                      | x      | x           | x             | 71.7      | 74     | <i>stridents; supplemental patterns: frontal lisp (67%); th/f (60%)</i>                                                 |
| SSD            | Syracuse | 22M     | M   | 5;3  | 71                      | 75     | 62          | 5             | 51.7      | 56     | <i>prevocalic liquids; no supplemental patterns &gt;40%</i>                                                             |
| SSD            | Syracuse | 23M     | M   | 4;0  | 85                      | 106    | 76          | 3             | 70.0      | 74     | <i>consonant sequences/clusters; no supplemental patterns &gt;40%</i>                                                   |
| SSD            | Syracuse | 24M     | M   | 5;11 | 103                     | x      | x           | x             | x         | 61     | <i>prevocalic liquids; th substitutions (80%) identified on supplemental patterns worksheet; no 3rd pattern &gt;40%</i> |
