# Supplementary material
Source: publisher figshare collection journal article supplement (https://asha.figshare.com/articles/dataset/_/14880039)
Supplement: Supplementary file 3 [file 1]

**Supplemental Material S3.** Complete model outputs.

Linear mixed model fit by maximum likelihood . t-tests use Satterthwaite's method ['lmerModLmerTest']

Formula: MCI ~ scale(age\_mos, scale = F) \* target\_IPA + (1 | word) + (1 + target\_IPA | subject)

Data: fuldat\_TD

| AIC    | BIC  | logLik | deviance | df.resid |
|--------|------|--------|----------|----------|
| 1289.4 | 1494 | -600.7 | 1201.4   | 728      |

Scaled residuals:

| Min     | 1Q     | Median  | 3Q     | Max    |
|---------|--------|---------|--------|--------|
| -2.3787 | -0.679 | -0.1384 | 0.5806 | 6.2247 |

Random effects:

| Groups                  | Name        | Variance    | Std.Dev.  | Corr  |       |       |      |       |      |
|-------------------------|-------------|-------------|-----------|-------|-------|-------|------|-------|------|
| subject                 | (Intercept) | 0.046610563 | 0.2158948 |       |       |       |      |       |      |
| target_IPAw             |             | 0.049283873 | 0.2219997 | -0.84 |       |       |      |       |      |
| target_IPAt             |             | 0.016539473 | 0.1286059 | -0.22 | 0.58  |       |      |       |      |
| target_IPAk             |             | 0.013140982 | 0.1146341 | -0.29 | 0.67  | 0.72  |      |       |      |
| target_IPAj             |             | 0.013168355 | 0.1147535 | 0.06  | -0.31 | -0.46 | 0.04 |       |      |
| target_IPAI             |             | 0.108144983 | 0.328854  | -0.77 | 0.89  | 0.37  | 0.77 | 0.14  |      |
| target_IPA <sub>l</sub> |             | 0.084438359 | 0.2905828 | -0.34 | 0.62  | 0.7   | 0.28 | -0.92 | 0.21 |
| word                    | (Intercept) | 0.000000129 | 0.0003594 |       |       |       |      |       |      |
| Residual                |             | 0.25506936  | 0.5050439 |       |       |       |      |       |      |

Number of obs: 772, groups: subject, 17; word, 16

Fixed effects:

|                                                | Estimate        | Std. Error      | df               | t value      | Pr(> t )              |
|------------------------------------------------|-----------------|-----------------|------------------|--------------|-----------------------|
| (Intercept)                                    | 2.442003        | 0.067167        | 16.945151        | 36.357       | 0.0000000000000002*** |
| scale(age_mos,scale=F)                         | -0.006541       | 0.008427        | 17.900938        | -0.776       | 0.447735              |
| <b>target_IPAw</b>                             | <b>0.218886</b> | <b>0.089134</b> | <b>23.021234</b> | <b>2.456</b> | <b>0.022032*</b>      |
| target_IPAt                                    | -0.061809       | 0.068753        | 15.183661        | -0.899       | 0.382687              |
| <b>target_IPAk</b>                             | <b>0.300681</b> | <b>0.066517</b> | <b>25.854092</b> | <b>4.52</b>  | <b>0.000121***</b>    |
| target_IPAj                                    | 0.091522        | 0.096015        | 60.902563        | 0.953        | 0.344252              |
| target_IPAI                                    | 0.173385        | 0.10838         | 17.003203        | 1.6          | 0.12806               |
| <b>target_IPA<sub>l</sub></b>                  | <b>0.430374</b> | <b>0.093457</b> | <b>17.023663</b> | <b>4.605</b> | <b>0.000251***</b>    |
| scale(age_mos,scale=F):target_IPAw             | 0.005079        | 0.011454        | 25.261336        | 0.443        | 0.661202              |
| scale(age_mos,scale=F):target_IPAt             | -0.004923       | 0.0088          | 15.888447        | -0.559       | 0.583686              |
| scale(age_mos,scale=F):target_IPAk             | -0.005559       | 0.008651        | 27.640997        | -0.643       | 0.525799              |
| scale(age_mos,scale=F):target_IPAj             | 0.00786         | 0.012968        | 79.823227        | 0.606        | 0.546168              |
| scale(age_mos,scale=F):target_IPAI             | 0.003433        | 0.013514        | 17.340128        | 0.254        | 0.802439              |
| scale(age_mos,scale=F):target_IPA <sub>l</sub> | 0.015082        | 0.011686        | 17.977279        | 1.291        | 0.213188              |

---  
 Signif. codes: 0 '\*\*\*' 0.001 '\*\*' 0.01 '\*' 0.05 '.' 0.1 ' ' 1

**Cumulative Link Mixed Model fitted with the Laplace approximation**

formula: NINFL ~ scale(age\_mos, scale = F) \* target\_IPA + (1 | word) + (1 + target\_IPA | subject)

data: fuldat\_TD

| link threshold | nobs | logLik | AIC     | niter       | max.grad | cond.H   |
|----------------|------|--------|---------|-------------|----------|----------|
| logit flexible | 772  | -968.1 | 2028.19 | 9369(37434) | 2.24E-03 | 4.00E+03 |

Random effects:

| Groups                  | Name        | Variance | Std.Dev. | Corr   |       |        |       |       |       |
|-------------------------|-------------|----------|----------|--------|-------|--------|-------|-------|-------|
| subject                 | (Intercept) | 2.1313   | 1.4599   |        |       |        |       |       |       |
| target_IPAw             |             | 0.8418   | 0.9175   | -0.478 |       |        |       |       |       |
| target_IPAt             |             | 0.1903   | 0.4363   | -0.266 | 0.507 |        |       |       |       |
| target_IPAk             |             | 0.7749   | 0.8803   | -0.68  | 0.852 | 0.387  |       |       |       |
| target_IPAj             |             | 0.6781   | 0.8235   | -0.355 | 0.79  | -0.121 | 0.665 |       |       |
| target_IPAI             |             | 1.6397   | 1.2805   | -0.882 | 0.398 | 0.626  | 0.538 | 0.015 |       |
| target_IPA <sub>l</sub> |             | 1.7977   | 1.3408   | -0.877 | 0.494 | 0.408  | 0.452 | 0.316 | 0.864 |
| word                    | (Intercept) | 0        | 0        |        |       |        |       |       |       |

Number of groups: subject 17, word 16

Coefficients:

|                                                | Estimate         | Std. Error      | z value       | Pr(> z )         |
|------------------------------------------------|------------------|-----------------|---------------|------------------|
| scale(age_mos,scale=F)                         | -0.004417        | 0.049752        | -0.089        | 0.92926          |
| target_IPAw                                    | 0.022284         | 0.383818        | 0.058         | 0.9537           |
| target_IPAt                                    | 0.118134         | 0.284695        | 0.415         | 0.67818          |
| target_IPAk                                    | 0.304924         | 0.333408        | 0.915         | 0.36042          |
| target_IPAj                                    | 0.089685         | 0.435712        | 0.206         | 0.83692          |
| <b>target_IPAI</b>                             | <b>0.881444</b>  | <b>0.425303</b> | <b>2.073</b>  | <b>0.03822*</b>  |
| <b>target_IPA<sub>l</sub></b>                  | <b>1.270267</b>  | <b>0.411853</b> | <b>3.084</b>  | <b>0.00204**</b> |
| scale(age_mos,scale=F):target_IPAw             | 0.034313         | 0.048428        | 0.709         | 0.47862          |
| <b>scale(age_mos,scale=F):target_IPAt</b>      | <b>-0.077731</b> | <b>0.035844</b> | <b>-2.169</b> | <b>0.03011*</b>  |
| scale(age_mos,scale=F):target_IPAt             | -0.024905        | 0.042557        | -0.585        | 0.55841          |
| scale(age_mos,scale=F):target_IPAt             | -0.03396         | 0.057163        | -0.594        | 0.55246          |
| scale(age_mos,scale=F):target_IPAI             | -0.027915        | 0.052384        | -0.533        | 0.5941           |
| scale(age_mos,scale=F):target_IPA <sub>l</sub> | 0.034009         | 0.050773        | 0.67          | 0.50297          |

---  
 Signif. codes: 0 '\*\*\*' 0.001 '\*\*' 0.01 '\*' 0.05 '.' 0.1 ' ' 1

Threshold coefficients:

|     | Estimate | Std. Error | z value |
|-----|----------|------------|---------|
| 1 2 | -0.4175  | 0.4042     | -1.033  |
| 2 3 | 1.073    | 0.4056     | 2.645   |
| 3 4 | 2.9925   | 0.42       | 7.126   |
| 4 5 | 4.6848   | 0.4683     | 10.003  |

Linear mixed model fit by maximum likelihood . t-tests use Satterthwaite's method ['lmerModLmerTest']

Formula: MCI ~ classification \* target\_IPA + (1 | word) + (1 + target\_IPA | subject)

Data: fuldat

|        |        |        |          |          |
|--------|--------|--------|----------|----------|
| AIC    | BIC    | logLik | deviance | df.resid |
| 1758.1 | 1977.9 | -835   | 1670.1   | 1048     |

Scaled residuals:

|         |         |         |       |        |
|---------|---------|---------|-------|--------|
| Min     | 1Q      | Median  | 3Q    | Max    |
| -2.5116 | -0.6986 | -0.1117 | 0.596 | 6.4042 |

Random effects:

| Groups     | Name        | Variance | Std.Dev. | Corr  |       |      |       |       |      |
|------------|-------------|----------|----------|-------|-------|------|-------|-------|------|
| subject    | (Intercept) | 0.03746  | 0.19355  |       |       |      |       |       |      |
| target_IPA |             | 0.076236 | 0.27611  | -0.52 |       |      |       |       |      |
| target_IPA |             | 0.017909 | 0.13382  | -0.1  | 0.79  |      |       |       |      |
| target_IPA |             | 0.043052 | 0.20749  | -0.03 | 0.79  | 0.89 |       |       |      |
| target_IPA |             | 0.007515 | 0.08669  | 0.19  | -0.48 | -0.3 | -0.06 |       |      |
| target_IPA |             | 0.114693 | 0.33866  | -0.63 | 0.93  | 0.66 | 0.77  | -0.15 |      |
| target_IPA |             | 0.081878 | 0.28614  | -0.33 | 0.71  | 0.55 | 0.33  | -0.95 | 0.42 |
| word       | (Intercept) | 0.00152  | 0.03898  |       |       |      |       |       |      |
| Residual   |             | 0.244766 | 0.49474  |       |       |      |       |       |      |

Number of obs: 1092, groups: subject, 24; word, 16

Fixed effects:

|                              | Estimate       | Std. Error     | df              | t value       | Pr(> t )                           |
|------------------------------|----------------|----------------|-----------------|---------------|------------------------------------|
| <b>(Intercept)</b>           | <b>2.44347</b> | <b>0.06484</b> | <b>24.31562</b> | <b>37.686</b> | <b>&lt; 0.0000000000000002 ***</b> |
| classificationSSD            | 0.06039        | 0.11615        | 23.28148        | 0.52          | 0.608031                           |
| <b>target_IPA</b>            | <b>0.23011</b> | <b>0.10241</b> | <b>27.64664</b> | <b>2.247</b>  | <b>0.032823 *</b>                  |
| target_IPA                   | -0.05244       | 0.074          | 17.93219        | -0.709        | 0.487599                           |
| <b>target_IPA</b>            | <b>0.30624</b> | <b>0.08123</b> | <b>28.21832</b> | <b>3.77</b>   | <b>0.000768 ***</b>                |
| target_IPA                   | 0.06587        | 0.09602        | 106.96647       | 0.686         | 0.494198                           |
| target_IPA                   | 0.15931        | 0.11149        | 28.09393        | 1.429         | 0.164029                           |
| <b>target_IPA</b>            | <b>0.42599</b> | <b>0.09405</b> | <b>27.85165</b> | <b>4.529</b>  | <b>0.000101 ***</b>                |
| classificationSSD:target_IPA | 0.02157        | 0.18179        | 30.89465        | 0.119         | 0.906316                           |
| classificationSSD:target_IPA | -0.09469       | 0.12901        | 22.65759        | -0.734        | 0.470504                           |
| classificationSSD:target_IPA | -0.27862       | 0.14617        | 27.62854        | -1.906        | 0.067091 .                         |
| classificationSSD:target_IPA | 0.04403        | 0.18953        | 190.20549       | 0.232         | 0.816547                           |
| classificationSSD:target_IPA | -0.04975       | 0.2008         | 24.61624        | -0.248        | 0.806366                           |
| classificationSSD:target_IPA | -0.16532       | 0.16622        | 25.79062        | -0.995        | 0.329188                           |

---  
Signif. codes: 0 '\*\*\*' 0.001 '\*\*' 0.01 '\*' 0.05 '.' 0.1 ' ' 1

**Cumulative Link Mixed Model fitted with the Laplace approximation**

formula: NINFL ~ classification \* target\_IPA + (1 | word) + (1 + target\_IPA | subject)

data: fuldat

| link  | threshold | nobs | logLik   | AIC     | niter       | max.grad | cond.H   |
|-------|-----------|------|----------|---------|-------------|----------|----------|
| logit | flexible  | 1092 | -1369.84 | 2831.68 | 7910(31550) | 2.01E-03 | 8.40E+02 |

Random effects:

| Groups                  | Name        | Variance | Std.Dev. | Corr   |       |       |       |        |       |
|-------------------------|-------------|----------|----------|--------|-------|-------|-------|--------|-------|
| subject                 | (Intercept) | 1.8087   | 1.3449   |        |       |       |       |        |       |
| target_IPAw             |             | 1.1964   | 1.0938   | -0.522 |       |       |       |        |       |
| target_IPAt             |             | 0.7795   | 0.8829   | -0.366 | 0.363 |       |       |        |       |
| target_IPAk             |             | 0.9444   | 0.9718   | -0.633 | 0.775 | 0.52  |       |        |       |
| target_IPAj             |             | 0.8513   | 0.9227   | -0.145 | 0.539 | -0.47 | 0.474 |        |       |
| target_IPAI             |             | 1.7554   | 1.3249   | -0.834 | 0.55  | 0.818 | 0.716 | -0.17  |       |
| target_IPA <sub>l</sub> |             | 1.9543   | 1.398    | -0.779 | 0.528 | 0.254 | 0.229 | -0.035 | 0.623 |
| word                    | (Intercept) | 0        | 0        |        |       |       |       |        |       |

Number of groups: subject 24, word 16

Coefficients:

|                                                 | Estimate        | Std. Error     | z value       | Pr(> z )        |
|-------------------------------------------------|-----------------|----------------|---------------|-----------------|
| classificationSSD                               | 0.6264          | 0.69121        | 0.906         | 0.3648          |
| target_IPAw                                     | 0.05817         | 0.41006        | 0.142         | 0.8872          |
| target_IPAt                                     | 0.201           | 0.33854        | 0.594         | 0.5527          |
| target_IPAk                                     | 0.34176         | 0.34649        | 0.986         | 0.324           |
| target_IPAj                                     | -0.01392        | 0.45178        | -0.031        | 0.9754          |
| <b>target_IPAI</b>                              | <b>0.98233</b>  | <b>0.43179</b> | <b>2.275</b>  | <b>0.0229*</b>  |
| <b>target_IPA<sub>l</sub></b>                   | <b>1.26569</b>  | <b>0.42028</b> | <b>3.012</b>  | <b>0.0026**</b> |
| classificationSSD:target_IPAw                   | -0.21983        | 0.74962        | -0.293        | 0.7693          |
| classificationSSD:target_IPAt                   | -0.68676        | 0.61296        | -1.12         | 0.2625          |
| classificationSSD:target_IPAk                   | -0.8752         | 0.64001        | -1.367        | 0.1715          |
| classificationSSD:target_IPAj                   | 0.43282         | 0.83869        | 0.516         | 0.6058          |
| classificationSSD:target_IPAI                   | -1.04922        | 0.79027        | -1.328        | 0.1843          |
| <b>classificationSSD:target_IPA<sub>l</sub></b> | <b>-1.60918</b> | <b>0.76509</b> | <b>-2.103</b> | <b>0.0354*</b>  |

---  
 Signif. codes: 0 '\*\*\*' 0.001 '\*\*' 0.01 '\*' 0.05 '.' 0.1 ' ' 1

Threshold coefficients:

|     | Estimate | Std. Error | z value |
|-----|----------|------------|---------|
| 1 2 | -0.5254  | 0.376      | -1.397  |
| 2 3 | 1.1667   | 0.3774     | 3.091   |
| 3 4 | 3.0968   | 0.3895     | 7.952   |
| 4 5 | 4.8102   | 0.433      | 11.109  |

**Linear mixed model fit by maximum likelihood . t-tests use Satterthwaite's method ['lmerModLmerTest']**

Formula: MCI ~ transcription\_accuracy\_binary \* classification \* target + (1 | word) + (1 + target\_IPA | subject)

Data: fuldat\_rl

| AIC   | BIC   | logLik | deviance | df.resid |
|-------|-------|--------|----------|----------|
| 647.2 | 696.9 | -310.6 | 621.2    | 326      |

Scaled residuals:

| Min     | 1Q     | Median | 3Q     | Max    |
|---------|--------|--------|--------|--------|
| -2.0299 | -0.677 | -0.114 | 0.5619 | 5.0734 |

Random effects:

Groups

subject

target\_IPA<sub>i</sub>

word

Residual

| Name                    | Variance | Std.Dev. | Corr  |
|-------------------------|----------|----------|-------|
| (Intercept)             | 0.04842  | 0.22     |       |
| target_IPA <sub>i</sub> | 0.07321  | 0.2706   | -0.49 |
| (Intercept)             | 0        | 0        |       |
| Residual                | 0.32936  | 0.5739   |       |

Number of obs: 339, groups: subject, 24; word, 6

Fixed effects:

|                                                                | Estimate       | Std. Error     | df               | t value       | Pr(> t )                         |
|----------------------------------------------------------------|----------------|----------------|------------------|---------------|----------------------------------|
| <b>(Intercept)</b>                                             | <b>2.74181</b> | <b>0.18117</b> | <b>156.23608</b> | <b>15.134</b> | <b>&lt;0.0000000000000002***</b> |
| transcription_accuracy_binarycorrect                           | -0.1583        | 0.19124        | 258.82902        | -0.828        | 0.409                            |
| classificationSSD                                              | -0.05577       | 0.24718        | 67.64444         | -0.226        | 0.822                            |
| targetr                                                        | 0.02148        | 0.19992        | 121.5473         | 0.107         | 0.915                            |
| transcription_accuracy_binarycorrect:classificationSSD         | -0.02722       | 0.29131        | 119.66471        | -0.093        | 0.926                            |
| transcription_accuracy_binarycorrect:targetr                   | 0.37888        | 0.23244        | 227.26371        | 1.63          | 0.104                            |
| classificationSSD:targetr                                      | 0.09385        | 0.28321        | 53.23579         | 0.331         | 0.742                            |
| transcription_accuracy_binarycorrect:classificationSSD:targetr | -0.30396       | 0.35788        | 161.70451        | -0.849        | 0.397                            |

---

Signif. codes: 0 '\*\*\*' 0.001 '\*\*' 0.01 '\*' 0.05 '.' 0.1 ' ' 1

**Cumulative Link Mixed Model fitted with the Laplace approximation**

formula: as.factor(NINFL) ~ transcription\_accuracy\_binary \* classification \* target + (1 | word) + (1 + target\_IPA | subject)

data: fuldat\_rl

| link  | threshold | nobs | logLik | AIC | niter      | max.grad | cond.H   |
|-------|-----------|------|--------|-----|------------|----------|----------|
| logit | flexible  | 339  | -458   | 946 | 1129(2342) | 1.24E-04 | 6.50E+02 |

Random effects:

| Groups     | Name        | Variance | Std.Dev. | Corr   |
|------------|-------------|----------|----------|--------|
| subject    | (Intercept) | 0.4549   | 0.6745   |        |
| target_IPA |             | 0.191    | 0.437    | -0.771 |
| word       | (Intercept) | 0        | 0        |        |

Number of groups: subject 24, word 6

Coefficients:

|                                                                | Estimate      | Std. Error   | z value      | Pr(> z )          |
|----------------------------------------------------------------|---------------|--------------|--------------|-------------------|
| transcription_accuracy_binarycorrect                           | -0.4297       | 0.6063       | -0.709       | 0.47846           |
| classificationSSD                                              | -0.427        | 0.8243       | -0.518       | 0.60446           |
| targetr                                                        | -0.6167       | 0.5949       | -1.037       | 0.29988           |
| transcription_accuracy_binarycorrect:classificationSSD         | 0.1743        | 0.9696       | 0.18         | 0.85733           |
| <b>transcription_accuracy_binarycorrect:targetr</b>            | <b>1.8623</b> | <b>0.703</b> | <b>2.649</b> | <b>0.00807 **</b> |
| classificationSSD:targetr                                      | -0.3104       | 0.8695       | -0.357       | 0.72106           |
| transcription_accuracy_binarycorrect:classificationSSD:targetr | -0.6478       | 1.1422       | -0.567       | 0.57062           |

---

Signif. codes: 0 '\*\*\*' 0.001 '\*\*' 0.01 '\*' 0.05 '.' 0.1 ' ' 1

Threshold coefficients:

|     | Estimate | Std. Error | z value |
|-----|----------|------------|---------|
| 1 2 | -1.5979  | 0.579      | -2.76   |
| 2 3 | -0.2379  | 0.5754     | -0.413  |
| 3 4 | 1.7137   | 0.587      | 2.919   |
| 4 5 | 3.3308   | 0.6449     | 5.165   |
